# Supplementary material
Source: PubMed Central journal article supplement (PMC2268591)
Supplement: pnas_0711982105_12.pdf [file pnas_0711982105_12.pdf]

**Table 1. Genome properties of *P. aeruginosa* strains and their genomes**

| Properties                         | PA2192                        | C3719            | PAO1       | PA14                              | PACS2           |
|------------------------------------|-------------------------------|------------------|------------|-----------------------------------|-----------------|
| Origin                             | Cystic Fibrosis               | Cystic Fibrosis  | Burn wound | Burn victim                       | Cystic Fibrosis |
| O-antigen biosynthetic genes *     | O1 <sup>†</sup>               | O3 <sup>‡</sup>  | O5         | 10                                | O1              |
| Genome size (bp)                   | 6,905,121                     | 6,222,097        | 6,264,404  | 6,537,648                         | 6,492,423       |
| ORFs                               | 6,191                         | 5,578            | 5,571      | 5,905                             | 5,676           |
| tRNAs                              | 46 <sup>§</sup>               | 40 <sup>§</sup>  | 64         | 63                                | 65 ****         |
| rRNAs                              | 4                             | 4                | 4          | 4                                 | 4               |
| GC content (%)                     | 66.2                          | 66.5             | 66.6       | 66.3                              | 66              |
| Leading strand - No. of Genes (%)  | 3386 (55)                     | 3043 (55)        | 3127 (56)  | 3212 (54)                         | 3088 (54)       |
| Leading strand - % essential genes | 65                            | 66               | 67         | 66                                | 58              |
| Total RGPs                         | 35                            | 31               | 32         | 37                                | 27              |
| No of Unique RGPs (RGP No.)        | 6 (RGP12, 17, 19, 30, 35, 42) | 3 (RGP8, 16, 46) | 1 (RGP34)  | 7 (RGP10, 11, 26, 32, 33, 38, 50) | 1(RGP62)        |
| Reference                          | This Study                    | This Study       | 1, 2       | 3, 4                              |                 |

\* As shown by Raymond *et al.* (5)

<sup>†</sup> PA2G\_02562 is a pseudogene (four nucleotide insertions creating a premature termination codon)

‡ *PACG\_02083* is a pseudogene (a single nucleotide insertion that results in a premature stop codon). The cluster also contains a 1137-bp insertion sequence.

§ Based on the information from the draft genomes PA2192 and PAC3719

#### References

1. Holloway BW (1955) *J Gen Microbiol* 13:572–581.
2. Stover CK, Pham XQ, Erwin AL, Mizoguchi SD, Warrenner P, Hickey MJ, Brinkman FS, Hufnagle WO, Kowalik DJ, Lagrou M, et al. (2000) *Nature* 406:959-964.
3. Schroth MN, Cho JJ, Green SK, Kominos SD (1977) in *Pseudomonas aeruginosa: Ecological Aspects and Patient Colonization*, ed. Young VM (Raven, New York).
4. Lee DG, Urbach JM, Wu G, Liberati NT, Feinbaum RL, Miyata S, Diggins LT, He J, Saucier M, Deziel E, et al. (2006) *Genome Biol* 7:R90.
5. Raymond CK, Sims EH, Kas A, Spencer DH, Kuttyavin TV, Ivey RG, Zhou Y, Kaul R, Clendenning JB, Olson MV (2002) *J Bacteriol* 184:3614-3622.
