# Supplementary material
Source: PubMed Central journal article supplement (PMC2268591)
Supplement: pnas_0711982105_13.pdf [file pnas_0711982105_13.pdf]

**Table 2. List of phylogenetically useful genes (PUG)**

| PA Number | Gene         | Alt gene         | Functional Annotation                                      | Functional Category | Parsimony-Informative Sites |
|-----------|--------------|------------------|------------------------------------------------------------|---------------------|-----------------------------|
| PA2002    | <i>atoE</i>  |                  | conserved hypothetical protein                             | b                   | 4                           |
| PA4372    |              |                  | hypothetical protein                                       | b                   | 4                           |
| PA5386    |              |                  | probable 3-hydroxyacyl-CoA dehydrogenase                   | b                   | 4                           |
| PA1164    |              |                  | conserved hypothetical protein                             | c                   | 4                           |
| PA1421    | <i>gbuA</i>  | <i>speB2</i>     | guanidinobutyrase                                          | e                   | 4                           |
| PA3792    | <i>leuA</i>  |                  | 2-isopropylmalate synthase                                 | e                   | 4                           |
| PA1475    | <i>ccmA</i>  | <i>helA/cycV</i> | heme exporter protein CcmA                                 | h                   | 4                           |
| PA2408    |              | <i>znuC</i>      | probable ATP-binding component of ABC transporter          | h                   | 4                           |
| PA2711    | <i>potF4</i> |                  | probable periplasmic spermidine/putrescine-binding protein | h                   | 4                           |
| PA0130    |              | <i>mmsA</i>      | probable aldehyde dehydrogenase                            | i                   | 4                           |
| PA0773    | <i>pdxJ</i>  |                  | pyridoxal phosphate biosynthetic protein PdxJ              | j                   | 4                           |
| PA3625    | <i>surE</i>  |                  | survival protein SurE                                      | k                   | 4                           |
| PA3548    | <i>algI</i>  |                  | alginate o-acetyltransferase AlgI                          | n                   | 4                           |
| PA4956    | <i>rhdA</i>  |                  | thiosulfate:cyanide sulfurtransferase                      | q                   | 4                           |
| PA1524    | <i>xdhA</i>  |                  | xanthine dehydrogenase                                     | r                   | 4                           |
| PA4720    | <i>trmA</i>  |                  | tRNA (uracil-5-)-methyltransferase                         | zB                  | 4                           |
| PA4693    | <i>pssA</i>  |                  | phosphatidylserine synthase                                | b                   | 5                           |

| PA Number | Gene        | Alt gene    | Functional Annotation                                              | Functional Category | Parsimony-Informative Sites |
|-----------|-------------|-------------|--------------------------------------------------------------------|---------------------|-----------------------------|
| PA3897    |             |             | hypothetical protein                                               | d                   | 5                           |
| PA1162    | <i>dapE</i> |             | succinyl-diaminopimelate desuccinylase                             | e                   | 5                           |
| PA3666    | <i>dapD</i> |             | tetrahydrodipicolinate succinylase                                 | e                   | 5                           |
| PA3814    | <i>iscS</i> |             | L-cysteine desulfurase (pyridoxal phosphate-dependent)             | e                   | 5                           |
| PA1651    |             |             | probable transporter                                               | h                   | 5                           |
| PA2341    | <i>mtlK</i> |             | probable ATP-binding component of ABC maltose/mannitol transporter | h                   | 5                           |
| PA5095    |             | <i>proW</i> | probable permease of ABC transporter                               | h                   | 5                           |
| PA4438    |             | <i>yhcM</i> | conserved hypothetical protein                                     | i                   | 5                           |
| PA2826    |             |             | probable glutathione peroxidase                                    | k                   | 5                           |
| PA2843    |             |             | probable aldolase                                                  | o                   | 5                           |
| PA1687    | <i>speE</i> |             | spermidine synthase                                                | q                   | 5                           |
| PA5260    | <i>hemC</i> | <i>popE</i> | porphobilinogen deaminase                                          | q                   | 5                           |
| PA0441    | <i>dht</i>  | <i>hyuA</i> | dihydropyrimidinase                                                | r                   | 5                           |
| PA0590    | <i>apaH</i> |             | bis(5'-nucleosyl)-tetraphosphatase                                 | r                   | 5                           |
| PA3751    | <i>purT</i> |             | phosphoribosylglycinamide formyltransferase 2                      | r                   | 5                           |
| PA5387    |             |             | conserved hypothetical protein                                     | c                   | 6                           |
| PA0229    | <i>pcaT</i> | <i>kgtP</i> | dicarboxylic acid transporter PcaT                                 | d                   | 6                           |

| PA Number | Gene        | Alt gene         | Functional Annotation                                            | Functional Category | Parsimony-Informative Sites |
|-----------|-------------|------------------|------------------------------------------------------------------|---------------------|-----------------------------|
| PA0392    |             | <i>yggT</i>      | conserved hypothetical protein                                   | d                   | 6                           |
| PA0440    | <i>dypA</i> |                  | probable oxidoreductase                                          | e                   | 6                           |
| PA3108    | <i>purF</i> |                  | amidophosphoribosyltransferase                                   | e                   | 6                           |
| PA5373    | <i>betB</i> |                  | betaine aldehyde dehydrogenase                                   | e                   | 6                           |
| PA5451    | <i>wzm</i>  |                  | membrane subunit of A-band<br>LPS efflux transporter             | g                   | 6                           |
| PA0301    | <i>spuE</i> | <i>potF3</i>     | polyamine transport protein                                      | h                   | 6                           |
| PA1207    | <i>kefB</i> | <i>trkB/kefC</i> | glutathione-regulated<br>potassium-efflux system protein<br>KefB | h                   | 6                           |
| PA3865    |             | <i>hisJ</i>      | probable amino acid binding<br>protein                           | h                   | 6                           |
| PA5479    | <i>gltP</i> |                  | proton-glutamate symporter                                       | h                   | 6                           |
| PA2776    | <i>ordL</i> |                  | conserved hypothetical protein                                   | i                   | 6                           |
| PA0182    |             | <i>yjgI</i>      | probable short-chain<br>dehydrogenase                            | j                   | 6                           |
| PA4606    | <i>cstA</i> |                  | conserved hypothetical protein                                   | k                   | 6                           |
| PA3970    | <i>amn</i>  |                  | AMP nucleosidase                                                 | r                   | 6                           |
| PA0211    | <i>mdcD</i> |                  | malonate decarboxylase beta<br>subunit                           | s                   | 6                           |
| PA5028    |             |                  | conserved hypothetical protein                                   | y                   | 6                           |
| PA2545    | <i>xthA</i> |                  | exodeoxyribonuclease III                                         | a                   | 7                           |
| PA1640    |             |                  | conserved hypothetical protein                                   | b                   | 7                           |
| PA2001    | <i>atoB</i> |                  | acetyl-CoA acetyltransferase                                     | b                   | 7                           |
| PA0240    | <i>opdF</i> |                  | probable porin                                                   | d                   | 7                           |
| PA2751    |             | <i>yfkH</i>      | conserved hypothetical protein                                   | d                   | 7                           |
| PA5172    | <i>arcB</i> |                  | ornithine carbamoyltransferase,                                  | e                   | 7                           |

| PA Number | Gene        | Alt gene    | Functional Annotation                                    | Functional Category | Parsimony-Informative Sites |
|-----------|-------------|-------------|----------------------------------------------------------|---------------------|-----------------------------|
|           |             |             | catabolic                                                |                     |                             |
| PA2278    | <i>arsB</i> |             | ArsB protein                                             | h                   | 7                           |
| PA3920    |             | <i>yvgX</i> | probable metal transporting P-type ATPase                | h                   | 7                           |
| PA1318    | <i>cyoB</i> |             | cytochrome o ubiquinol oxidase subunit I                 | i                   | 7                           |
| PA5192    | <i>pckA</i> |             | phosphoenolpyruvate carboxykinase                        | i                   | 7                           |
| PA0500    | <i>bioB</i> |             | biotin synthase                                          | j                   | 7                           |
| PA2611    | <i>cysG</i> |             | siroheme synthase                                        | j                   | 7                           |
| PA0181    |             | <i>yeaT</i> | probable transcriptional regulator                       | l                   | 7                           |
| PA4367    |             |             | conserved hypothetical protein                           | m                   | 7                           |
| PA2823    |             |             | conserved hypothetical protein                           | o                   | 7                           |
| PA4974    | <i>opmH</i> |             | probable outer membrane protein precursor                | x                   | 7                           |
| PA1528    | <i>zipA</i> |             | cell division protein ZipA                               | y                   | 7                           |
| PA3617    | <i>recA</i> |             | RecA protein                                             | a                   | 8                           |
| PA3164    |             |             | 3-phosphoshikimate 1-carboxyvinyltransferase             | e                   | 8                           |
| PA4696    | <i>ilvI</i> |             | acetolactate synthase large subunit                      | e                   | 8                           |
| PA3047    | <i>dacB</i> | <i>pbp</i>  | probable D-alanyl-D-alanine carboxypeptidase             | g                   | 8                           |
| PA3186    | <i>oprB</i> |             | Glucose/carbohydrate outer membrane porin OprB precursor | h                   | 8                           |

| PA Number | Gene         | Alt gene    | Functional Annotation                                               | Functional Category | Parsimony-Informative Sites |
|-----------|--------------|-------------|---------------------------------------------------------------------|---------------------|-----------------------------|
| PA2623    | <i>icdA</i>  |             | isocitrate dehydrogenase                                            | i                   | 8                           |
| PA5034    | <i>hemE</i>  |             | uroporphyrinogen decarboxylase                                      | j                   | 8                           |
| PA4184    |              |             | probable transcriptional regulator                                  | l                   | 8                           |
| PA5550    | <i>glmR</i>  |             | GlmR transcriptional regulator                                      | l                   | 8                           |
| PA3828    |              | <i>yjgP</i> | conserved hypothetical protein                                      | d                   | 9                           |
| PA4370    | <i>icmP</i>  |             | Insulin-cleaving metalloproteinase outer membrane protein precursor | d                   | 9                           |
| PA2249    | <i>bkdB</i>  |             | branched-chain alpha-keto acid dehydrogenase (lipoamide component)  | e                   | 9                           |
| PA2309    |              |             | hypothetical protein                                                | h                   | 9                           |
| PA2250    | <i>lpdV</i>  |             | lipoamide dehydrogenase-Val                                         | i                   | 9                           |
| PA4470    | <i>fumC1</i> |             | fumarate hydratase                                                  | i                   | 9                           |
| PA2903    | <i>cobJ</i>  | <i>cbiH</i> | precorrin-3 methylase CobJ                                          | j                   | 9                           |
| PA5237    |              | <i>yigC</i> | conserved hypothetical protein                                      | j                   | 9                           |
| PA4398    |              |             | probable two-component sensor                                       | m                   | 9                           |
| PA2494    | <i>mexF</i>  |             | Resistance-Nodulation-Cell Division (RND) multidrug efflux          | zA                  | 9                           |
| PA2840    | <i>deaD</i>  |             | probable ATP-dependent RNA helicase                                 | zB                  | 9                           |
| PA0507    |              | <i>fad?</i> | probable acyl-CoA dehydrogenase                                     | b                   | 10                          |
| PA5546    |              |             | conserved hypothetical protein                                      | b                   | 10                          |

| PA Number | Gene        | Alt gene    | Functional Annotation                                                                       | Functional Category | Parsimony-Informative Sites |
|-----------|-------------|-------------|---------------------------------------------------------------------------------------------|---------------------|-----------------------------|
| PA3424    |             |             | hypothetical protein                                                                        | e                   | 10                          |
| PA3624    | <i>pcm</i>  |             | L-isoaspartate protein carboxylmethyltransferase type II                                    | f                   | 10                          |
| PA3824    | <i>queA</i> |             | S-adenosylmethionine:trna ribosyltransferase-isomerase                                      | f                   | 10                          |
| PA0185    | <i>atsB</i> |             | probable permease of ABC transporter                                                        | h                   | 10                          |
| PA0281    | <i>cysW</i> |             | sulfate transport protein CysW                                                              | h                   | 10                          |
| PA3677    |             |             | probable Resistance-Nodulation-Cell Division (RND) efflux membrane fusion protein precursor | h                   | 10                          |
| PA2867    |             |             | probable chemotaxis transducer                                                              | u                   | 10                          |
| PA1730    |             |             | conserved hypothetical protein                                                              | c                   | 11                          |
| PA1566    |             |             | conserved hypothetical protein                                                              | e                   | 11                          |
| PA4548    | <i>dada</i> | <i>yfiT</i> | probable D-amino acid oxidase                                                               | e                   | 11                          |
| PA4344    |             |             | probable hydrolase                                                                          | f                   | 11                          |
| PA0464    | <i>creC</i> | <i>phoM</i> | two-component sensor CreC                                                                   | m                   | 11                          |
| PA2346    |             |             | conserved hypothetical protein                                                              | o                   | 11                          |
| PA3769    | <i>guaA</i> |             | GMP synthase                                                                                | r                   | 11                          |
| PA4701    |             |             | conserved hypothetical protein                                                              | c                   | 12                          |
| PA1638    |             | <i>yneH</i> | conserved hypothetical protein                                                              | e                   | 12                          |
| PA5235    | <i>glpT</i> |             | glycerol-3-phosphate transporter                                                            | h                   | 12                          |
| PA4733    | <i>acsB</i> |             | acetyl-coenzyme A synthetase                                                                | q                   | 12                          |
| PA3950    |             |             | probable ATP-dependent RNA                                                                  | zB                  | 12                          |

| PA Number | Gene         | Alt gene                  | Functional Annotation                                         | Functional Category | Parsimony-Informative Sites |
|-----------|--------------|---------------------------|---------------------------------------------------------------|---------------------|-----------------------------|
|           |              |                           | helicase                                                      |                     |                             |
| PA5443    | <i>uvrD</i>  | <i>recL/rad/pdeB/mutU</i> | DNA helicase II                                               | a                   | 13                          |
| PA0454    |              | <i>yccS</i>               | conserved hypothetical protein                                | d                   | 13                          |
| PA3257    | <i>prc</i>   | <i>tsp</i>                | periplasmic tail-specific protease                            | f                   | 13                          |
| PA1946    | <i>rbsB</i>  |                           | binding protein component precursor of ABC ribose transporter | h                   | 13                          |
| PA3896    |              |                           | probable 2-hydroxyacid dehydrogenase                          | i                   | 13                          |
| PA0757    |              | <i>tctE</i>               | probable two-component sensor                                 | m                   | 13                          |
| PA3710    |              |                           | probable GMC-type oxidoreductase                              | o                   | 13                          |
| PA1101    | <i>fliF</i>  |                           | Flagella M-ring outer membrane protein precursor              | t                   | 13                          |
| PA1886    | <i>polB</i>  | <i>dinA</i>               | DNA polymerase II                                             | a                   | 14                          |
| PA1689    |              |                           | conserved hypothetical protein                                | d                   | 14                          |
| PA1272    | <i>cobO</i>  | <i>cobA/btuR</i>          | cob(I)alamin adenosyltransferase                              | j                   | 14                          |
| PA3821    | <i>secD</i>  |                           | secretion protein SecD                                        | x                   | 14                          |
| PA4483    | <i>gatA</i>  |                           | Glu-tRNA(Gln) amidotransferase subunit A                      | f                   | 15                          |
| PA3759    |              |                           | probable aminotransferase                                     | g                   | 15                          |
| PA3028    | <i>moeA2</i> |                           | molybdenum cofactor biosynthesis protein A2                   | j                   | 15                          |
| PA4692    |              |                           | conserved hypothetical protein                                | o                   | 15                          |
| PA3271    |              | <i>flhS</i>               | probable two-component sensor                                 | m                   | 16                          |

| PA Number | Gene        | Alt gene         | Functional Annotation                                      | Functional Category | Parsimony-Informative Sites |
|-----------|-------------|------------------|------------------------------------------------------------|---------------------|-----------------------------|
| PA0559    |             | <i>yhiN</i>      | conserved hypothetical protein                             | d                   | 17                          |
| PA5529    |             |                  | probable sodium/proton antiporter                          | h                   | 17                          |
| PA1585    | <i>sucA</i> |                  | 2-oxoglutarate dehydrogenase (E1 subunit)                  | i                   | 17                          |
| PA4843    |             |                  | probable two-component response regulator                  | m                   | 17                          |
| PA0183    | <i>atsA</i> |                  | arylsulfatase                                              | q                   | 17                          |
| PA1532    | <i>dnaX</i> |                  | DNA polymerase subunits gamma and tau                      | a                   | 18                          |
| PA4115    |             | <i>ygdH</i>      | conserved hypothetical protein                             | o                   | 21                          |
| PA3893    |             |                  | conserved hypothetical protein                             | x                   | 22                          |
| PA2018    | <i>mexH</i> | <i>amrB/mexY</i> | Resistance-Nodulation-Cell Division (RND) multidrug efflux | zA                  | 23                          |
| PA5447    | <i>wbpZ</i> |                  | glycosyltransferase WbpZ                                   | g                   | 25                          |
| PA3297    | <i>hrpA</i> |                  | probable ATP-dependent helicase                            | a                   | 26                          |
| PA4686    |             |                  | hypothetical protein                                       | c                   | 26                          |
| PA4772    |             |                  | probable ferredoxin                                        | i                   | 27                          |
| PA4513    | <i>piuB</i> |                  | probable oxidoreductase                                    | o                   | 29                          |
| PA3961    | <i>hrpB</i> |                  | probable ATP-dependent helicase                            | a                   | 30                          |
| PA3258    |             |                  | hypothetical protein                                       | o                   | 31                          |
| PA5556    | <i>atpA</i> | <i>papA/uncA</i> | ATP synthase alpha chain                                   | i                   | 55                          |
| PA2393    |             |                  | probable dipeptidase precursor                             | q                   | 118                         |
| PA2403    |             |                  | hypothetical protein                                       | d                   | 138                         |



| <b>PA Number</b> | <b>Gene</b> | <b>Alt gene</b> | <b>Functional Annotation</b>                     | <b>Functional Category</b> | <b>Parsimony-Informative Sites</b> |
|------------------|-------------|-----------------|--------------------------------------------------|----------------------------|------------------------------------|
| PA0595           | <i>ostA</i> | <i>imp</i>      | organic solvent tolerance protein OstA precursor | k                          | 376                                |
