# Supplementary material
Source: PubMed Central journal article supplement (PMC2268591)
Supplement: pnas_0711982105_14.pdf [file pnas_0711982105_14.pdf]

**Table 4. Summary of BLAST results for RGP sequences**

|                                                                           | Core                                              | Accessory    |
|---------------------------------------------------------------------------|---------------------------------------------------|--------------|
| <i>Acidovorax</i>                                                         | 4                                                 | 1            |
| <i>Comamonas</i>                                                          | 0                                                 | 0            |
| <i>Delftia</i>                                                            | 2                                                 | 0            |
| <i>Bordetella</i>                                                         | 168                                               | 21           |
| <i>Burkholderia</i>                                                       | 870                                               | 142          |
| <i>Cupriavidus</i>                                                        | 403                                               | 245          |
| <i>Chromobacterium</i>                                                    | 124                                               | 42           |
| <i>Nitrosomonas</i>                                                       | 56                                                | 1            |
| <i>Azotobacter</i>                                                        | 2802                                              | 188          |
| <i>P. abietaniphila</i>                                                   | 7                                                 | 17           |
| <i>P. entomophila</i>                                                     | 0                                                 | 0            |
| <i>P. fluorescens</i>                                                     | 5994                                              | 343          |
| <i>P. mendocina</i>                                                       | 24                                                | 6            |
| <i>P. putida</i>                                                          | 2944                                              | 208          |
| <i>P. syringae</i>                                                        | 2208                                              | 310          |
| Other Pseudomonads                                                        | 378                                               | 49           |
| <i>E. coli</i>                                                            | 42                                                | 14           |
| <i>Shewanella</i>                                                         | 106                                               | 20           |
| $\gamma$ proteobacterium                                                  | 0                                                 | 0            |
| <i>Xanthomonas</i>                                                        | 136                                               | 35           |
| <i>Sinorhizobium</i>                                                      | 33                                                | 8            |
| Bacteriophage                                                             | 22                                                | 68           |
| Eukaryotes                                                                | 8                                                 | 1            |
| Other                                                                     | 2558                                              | 448          |
|                                                                           |                                                   |              |
| <b><i>Pseudomonas</i> Total</b>                                           | 11555                                             | 933          |
| <b>Others Total1</b>                                                      | 4429                                              | 640          |
| <b>Others Total2</b>                                                      | 2905                                              | 594          |
| <b>Others Total</b>                                                       | 7334                                              | 1234         |
| <b>Remaining genes (No Hits or Paralogs)</b>                              | 1195                                              | 687          |
| <b>Number of Predicted Paralogs</b>                                       | 388                                               | 90           |
| <b>Genome Size (ORFs)</b>                                                 | 23251                                             | 23251        |
| <b>Pseudomonas Percent of Total</b>                                       | 0.50                                              | 0.04         |
| <b>Others Percent</b>                                                     | 0.32                                              | 0.05         |
| <b>CORE or ACCESSORY Size</b>                                             | 20084                                             | 2854         |
| <b>Pseudomonas Percent of CORE or ACCESSORY</b>                           | 0.58                                              | 0.33         |
| <b>Others Percent of CORE or ACCESSORY</b>                                | 0.37                                              | 0.43         |
| <b>Corrected Percentages (Counting Remaining as Non-Pseudomonas Hits)</b> |                                                   |              |
|                                                                           | <b><i>Pseudomonas</i> Percentage</b>              | <b>57.53</b> |
|                                                                           | <b>Others (Non-<i>Pseudomonas</i>) Percentage</b> | <b>64.16</b> |
