# Supplementary material
Source: PubMed Central journal article supplement (PMC2268591)
Supplement: pnas_0711982105_15.pdf [file pnas_0711982105_15.pdf]

**Table 5. Primers used to detect the excision and presence of a circular intermediates of the tRNA-linked RGPs**

| <b>RGP</b> | <b>Primer sequence (5' to3')</b>                                                                             |
|------------|--------------------------------------------------------------------------------------------------------------|
| RGP5       | P1: CCGCTGAACTTCTGGGAATA<br>P2: GCGGAATTCCACACCATC<br>P3: GCCATCCGACTTGACGTAGT<br>P4: ATGTACGGGATGATGGTGGT   |
| RGP8       | P1: CGTCTGTGGGACAAGGAAAC<br>P2: ACTCGGCACAAACCGATAAC<br>P3: ACGCCGAAGGAAAGGAATAC<br>P4: CTACGAGCACGAAAACGTGA |
| RGP17      | P1: GTAGGCCTGGGAGAGAAAGC<br>P2: CCATCTGCTTGAGAGCCTTG<br>P3: GATACGTCCCAAGCGACACT<br>P4: GAATCAAGGCTCTGGAGTCG |
| RGP41      | P1: GACAAGACCAGCCACAACCT<br>P2: GTGGTGATGACCTCCAACCT<br>P3: CGAGCACAGAAATGTCCTGA<br>P4: AGCTACATCGAGGCCGACTA |
| RGP62      | P1: CCAGCAGGAGATGGACAAGT<br>P2: GATCGACACCTCGATCCTGT<br>P3: CAGATCTGGACGGGTGATCT<br>P4: CTGTCAGGTGCTTTGCTCAG |
