# Supplementary material
Source: PubMed Central journal article supplement (PMC2268591)
Supplement: pnas_0711982105_16.pdf [file pnas_0711982105_16.pdf]

**Table 6. Sequences of Direct Repeats (DR) identified in those RGP's that can excise from their chromosomal locations**

| <b>RGP</b>        | <b>Associated tRNA</b> | <b>Strains</b> | <b>Detection of excision</b> | <b>Presence of circular form</b> | <b>Sequence of DR (5'-3')</b>                          |
|-------------------|------------------------|----------------|------------------------------|----------------------------------|--------------------------------------------------------|
| RGP5              | Gly                    | PAO1           | +                            | -                                | TGGAGCGGGCGAAGGGAATCGAACCCCT                           |
|                   |                        | PA14           | +                            | -                                |                                                        |
|                   |                        | PA2192         | +                            | +                                |                                                        |
| RGP8              | Ser                    | C3719          | +                            | +                                | AGGGTTCAAATCCCTATCTCTCCGCCATTACA<br>TATGAGCAAAGCCCCCTG |
| RGP17             | Leu                    | PA2192         | +                            | +                                | TCTCTCCGTCCGCACCAT                                     |
| RGP41<br>(PAPI-1) | Lys                    | PA14           | +                            | +                                | CTTTTAACCAATTGGTCGTAGGTTCCGAATCCT<br>ACACGACCCACCAT    |
|                   |                        | PA2192         | +                            | -                                |                                                        |
|                   |                        | C3719          | +                            | +                                |                                                        |
|                   |                        | PACS2          | +                            | +                                |                                                        |
| RGP62             | Phe                    | PACS2          | +                            | +                                | GTTTCGATTCCGTCCTCCCTGGCACCAT                           |
