# Supplementary material
Source: PubMed Central journal article supplement (PMC2268591)

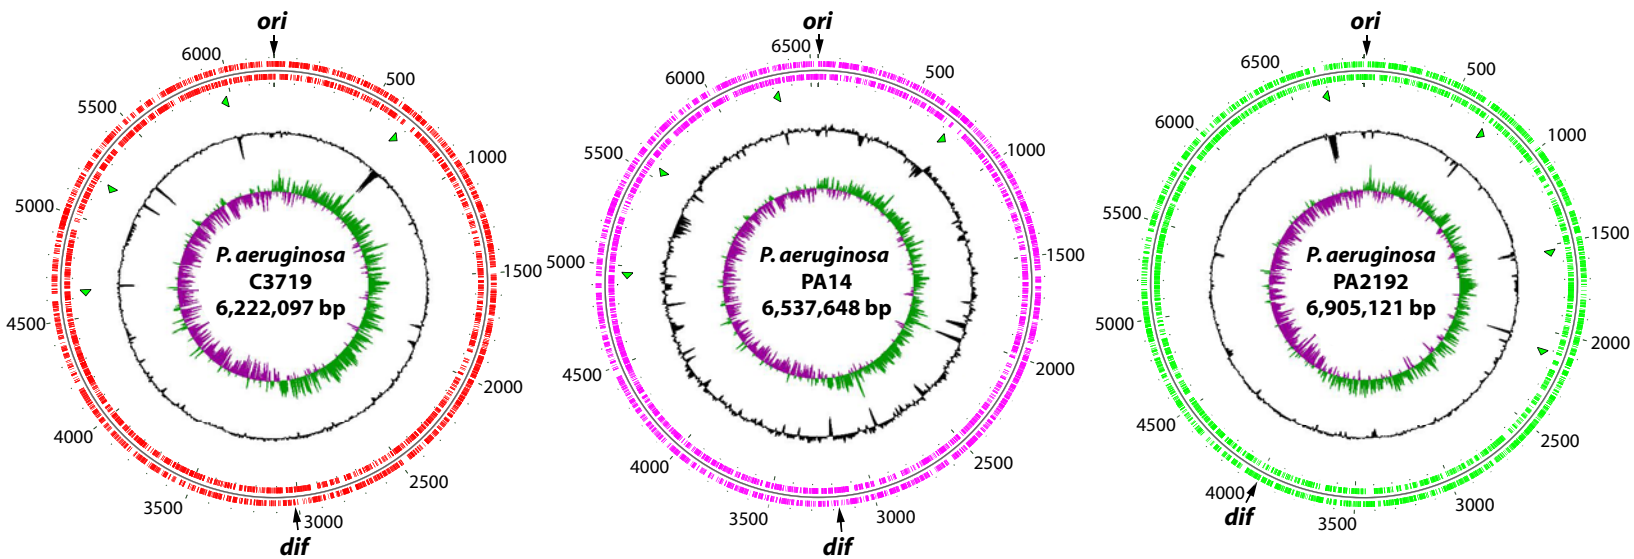

Supplement: pnas_0711982105_1.pdf [file pnas_0711982105_1.pdf]

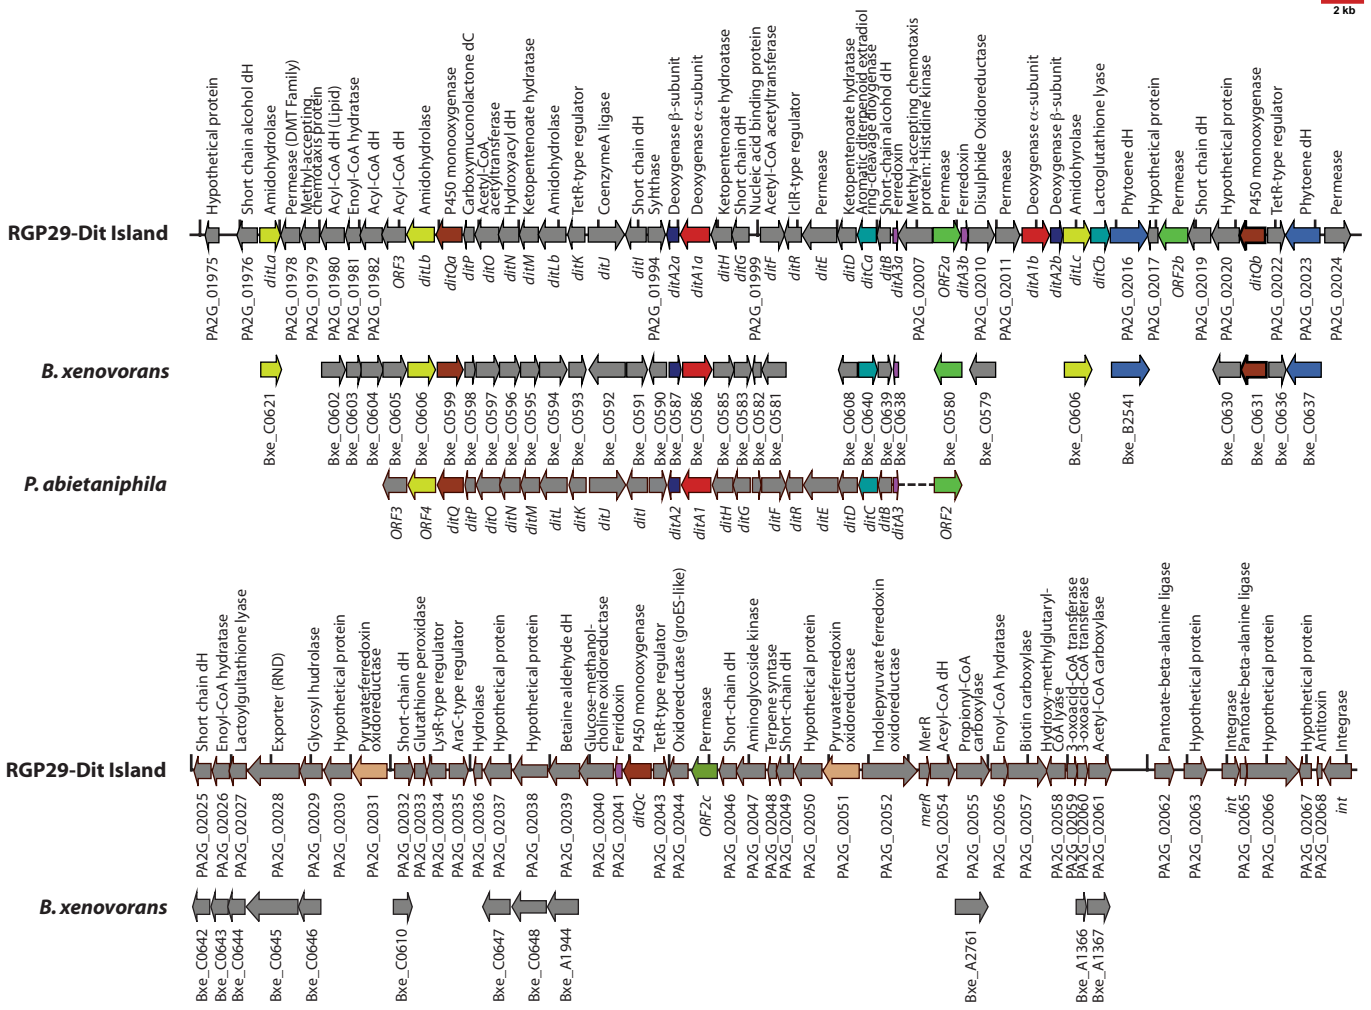

Supplement: pnas_0711982105_11.pdf [file pnas_0711982105_11.pdf]

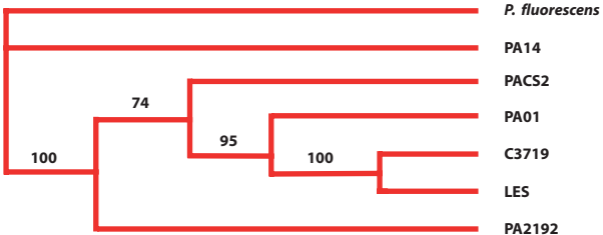

Supplement: pnas_0711982105_2.pdf [file pnas_0711982105_2.pdf]

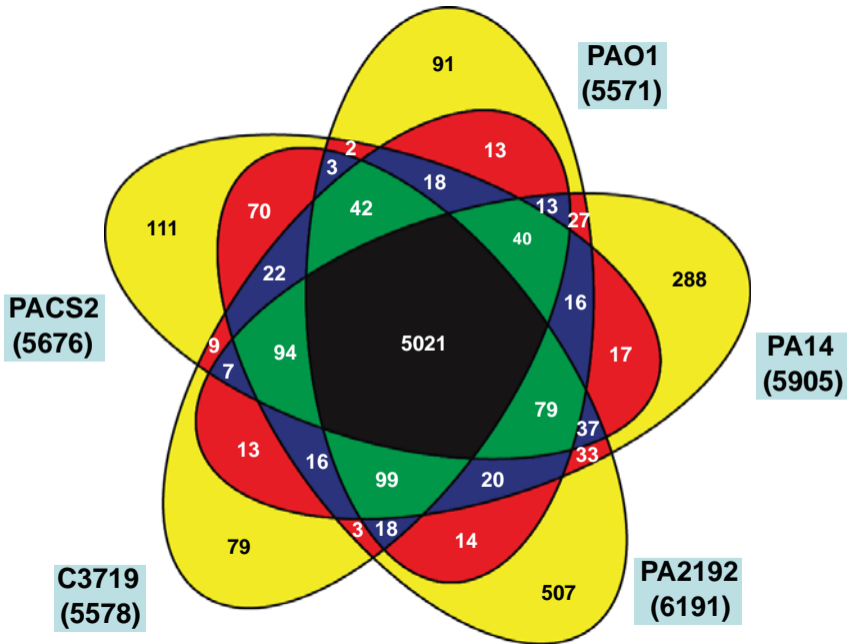

Supplement: pnas_0711982105_3.pdf [file pnas_0711982105_3.pdf]

# RGP1

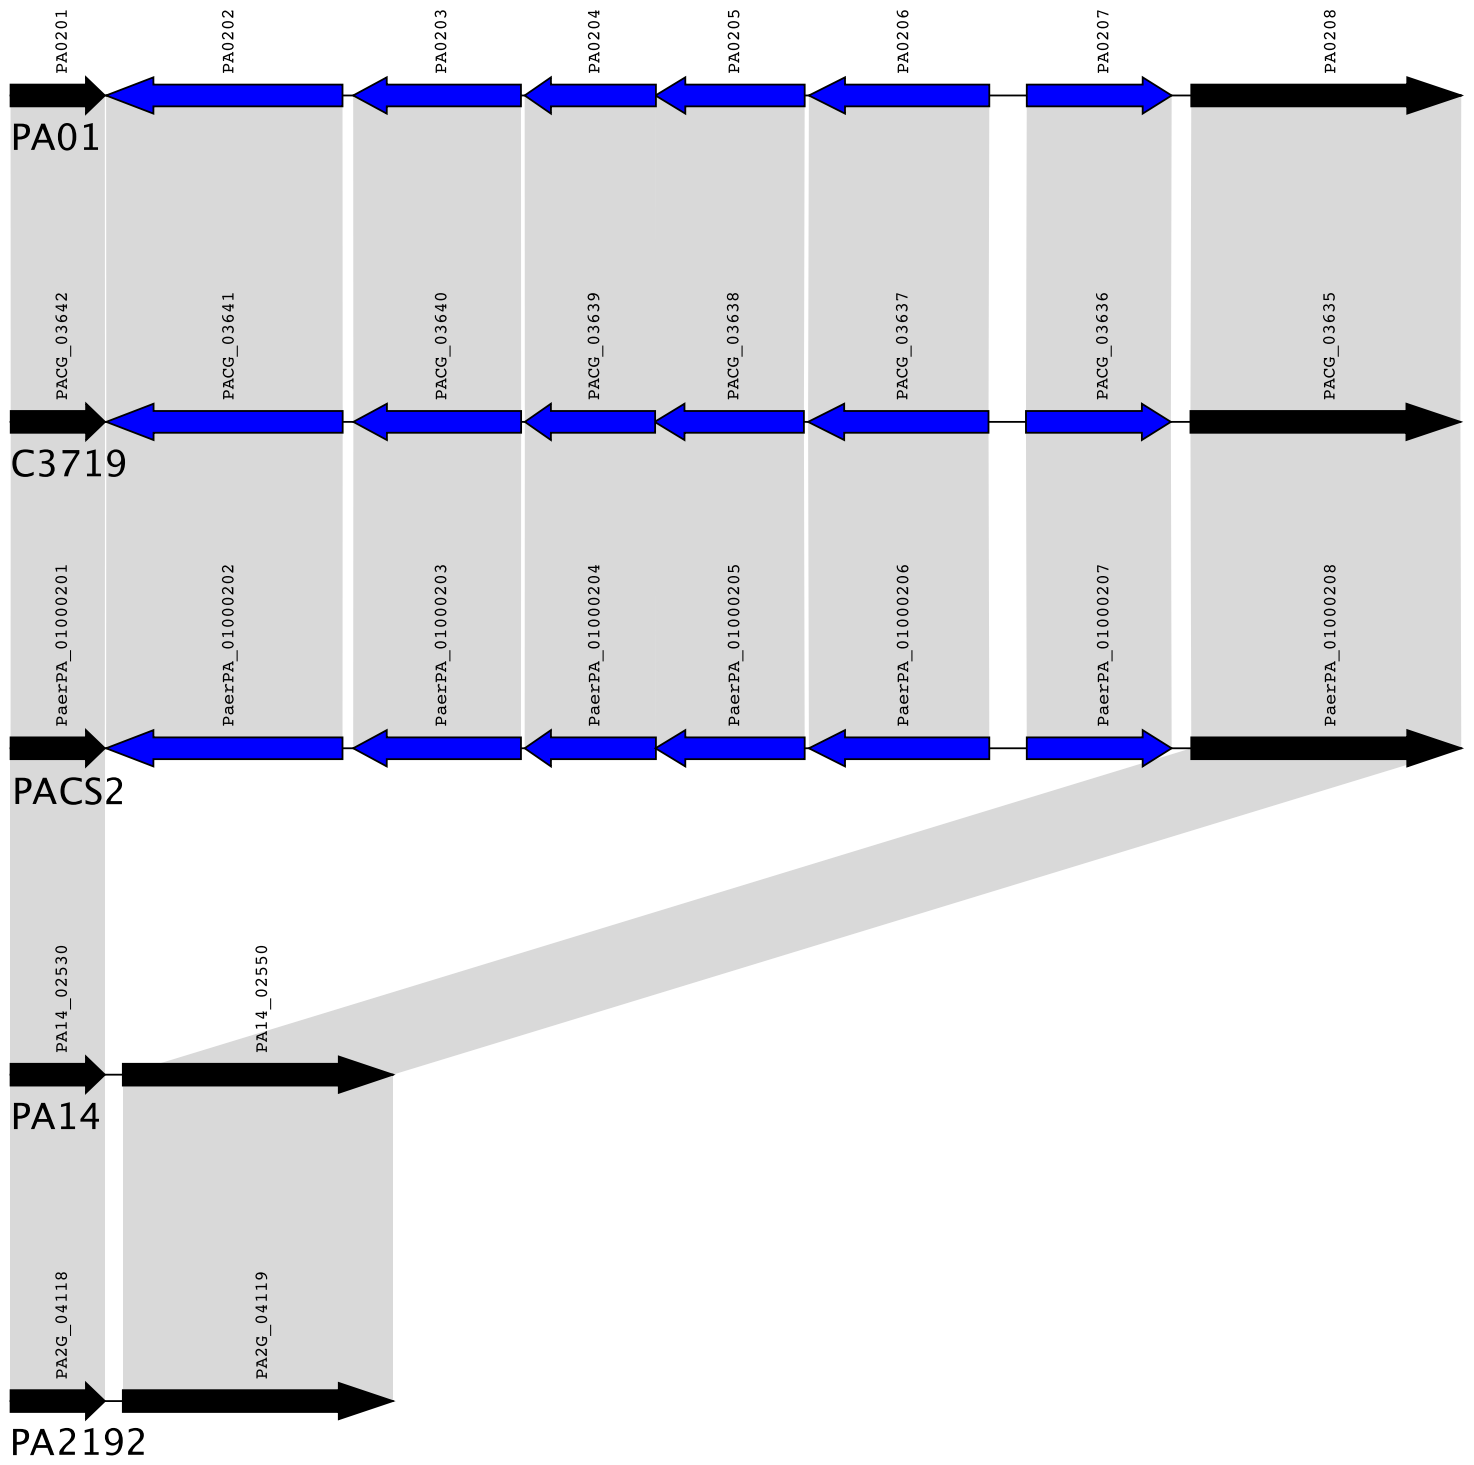

# RGP2

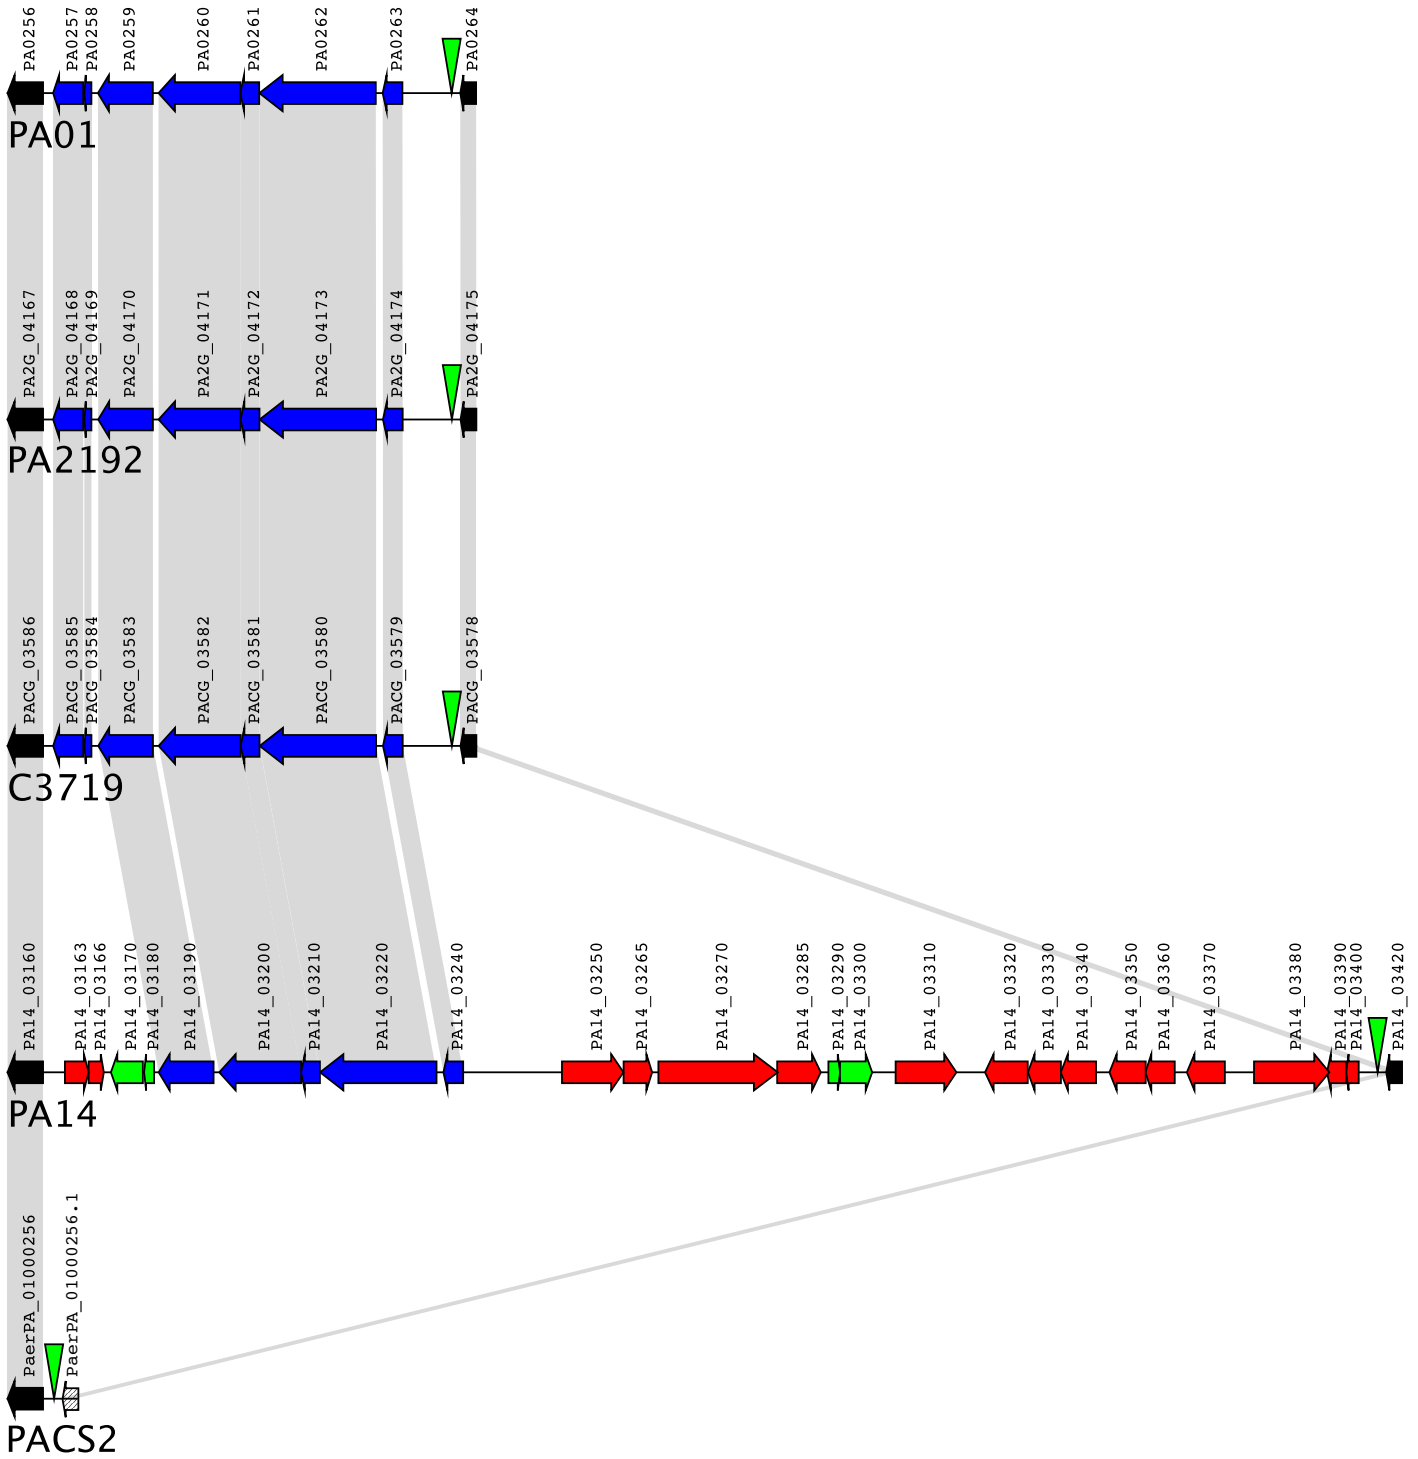

# RGP3

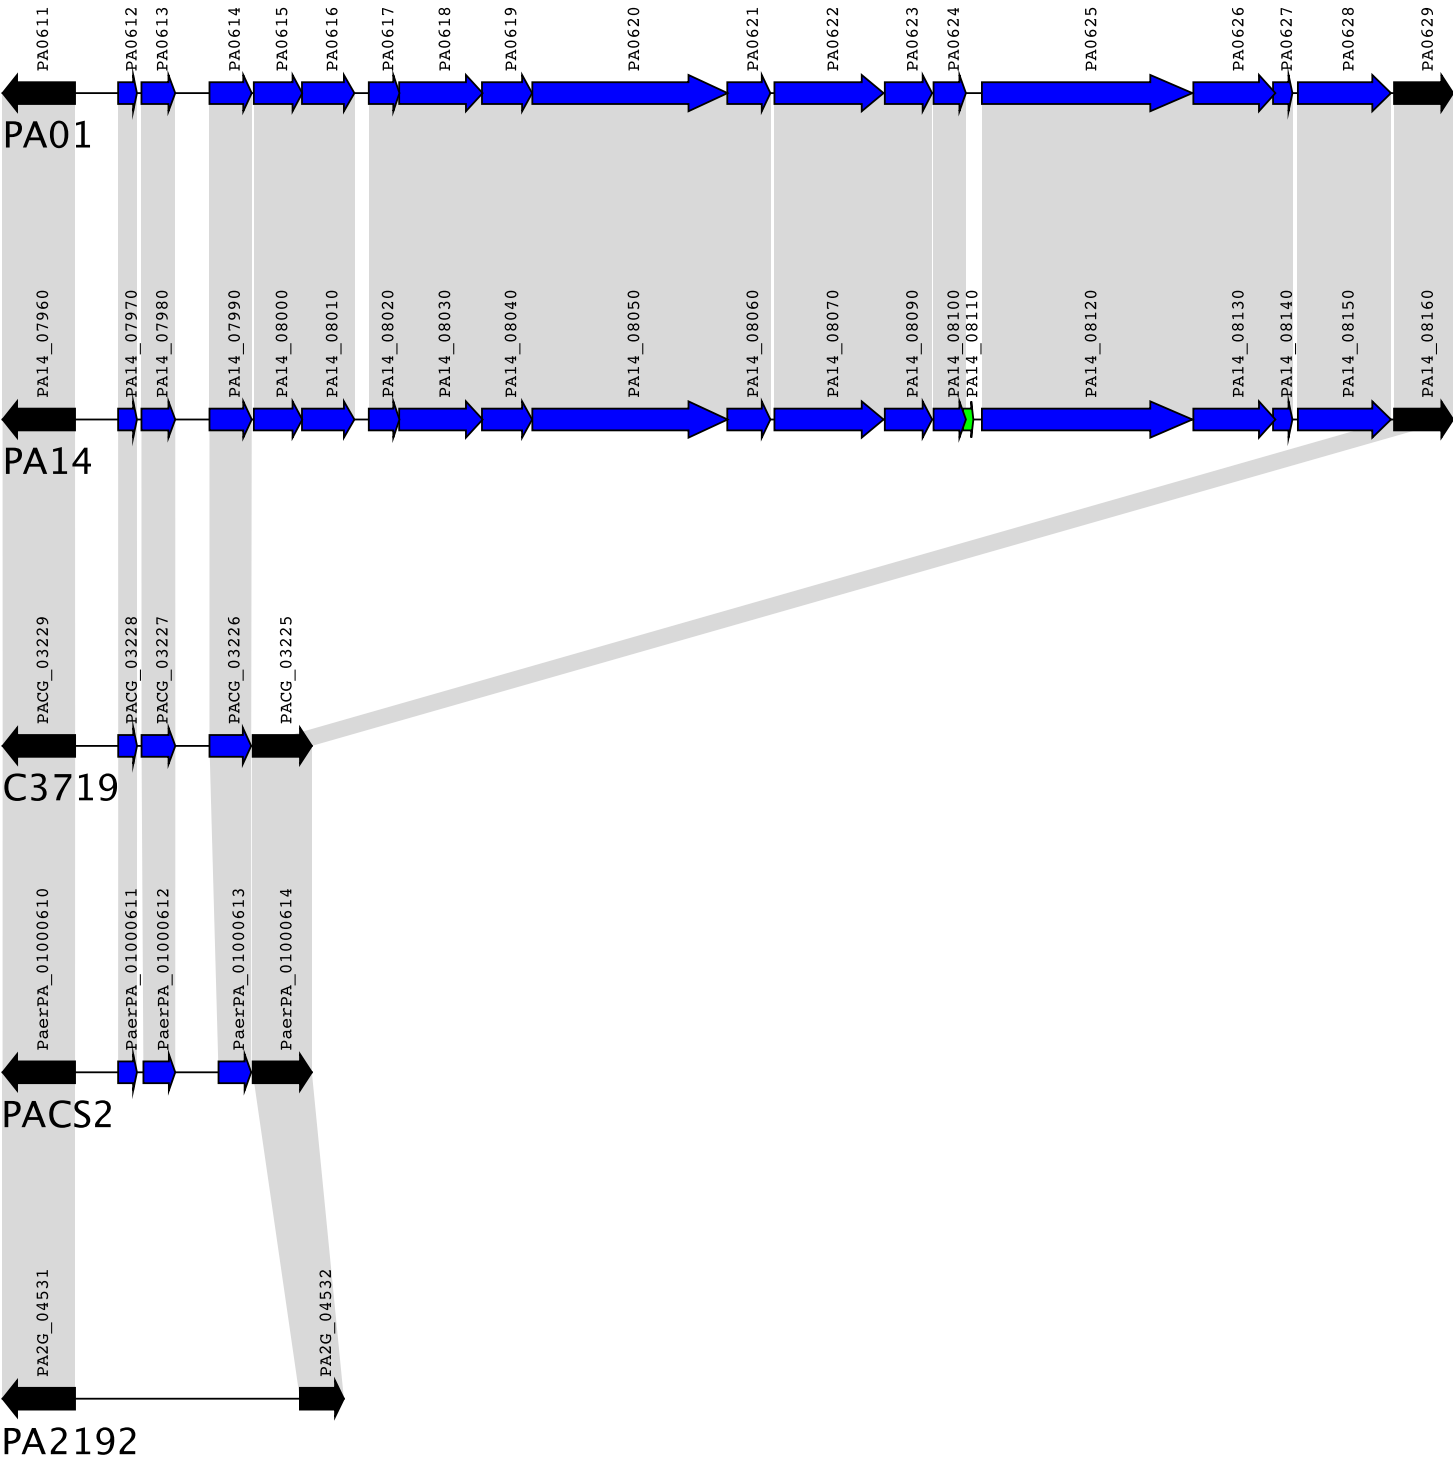

# RGP4

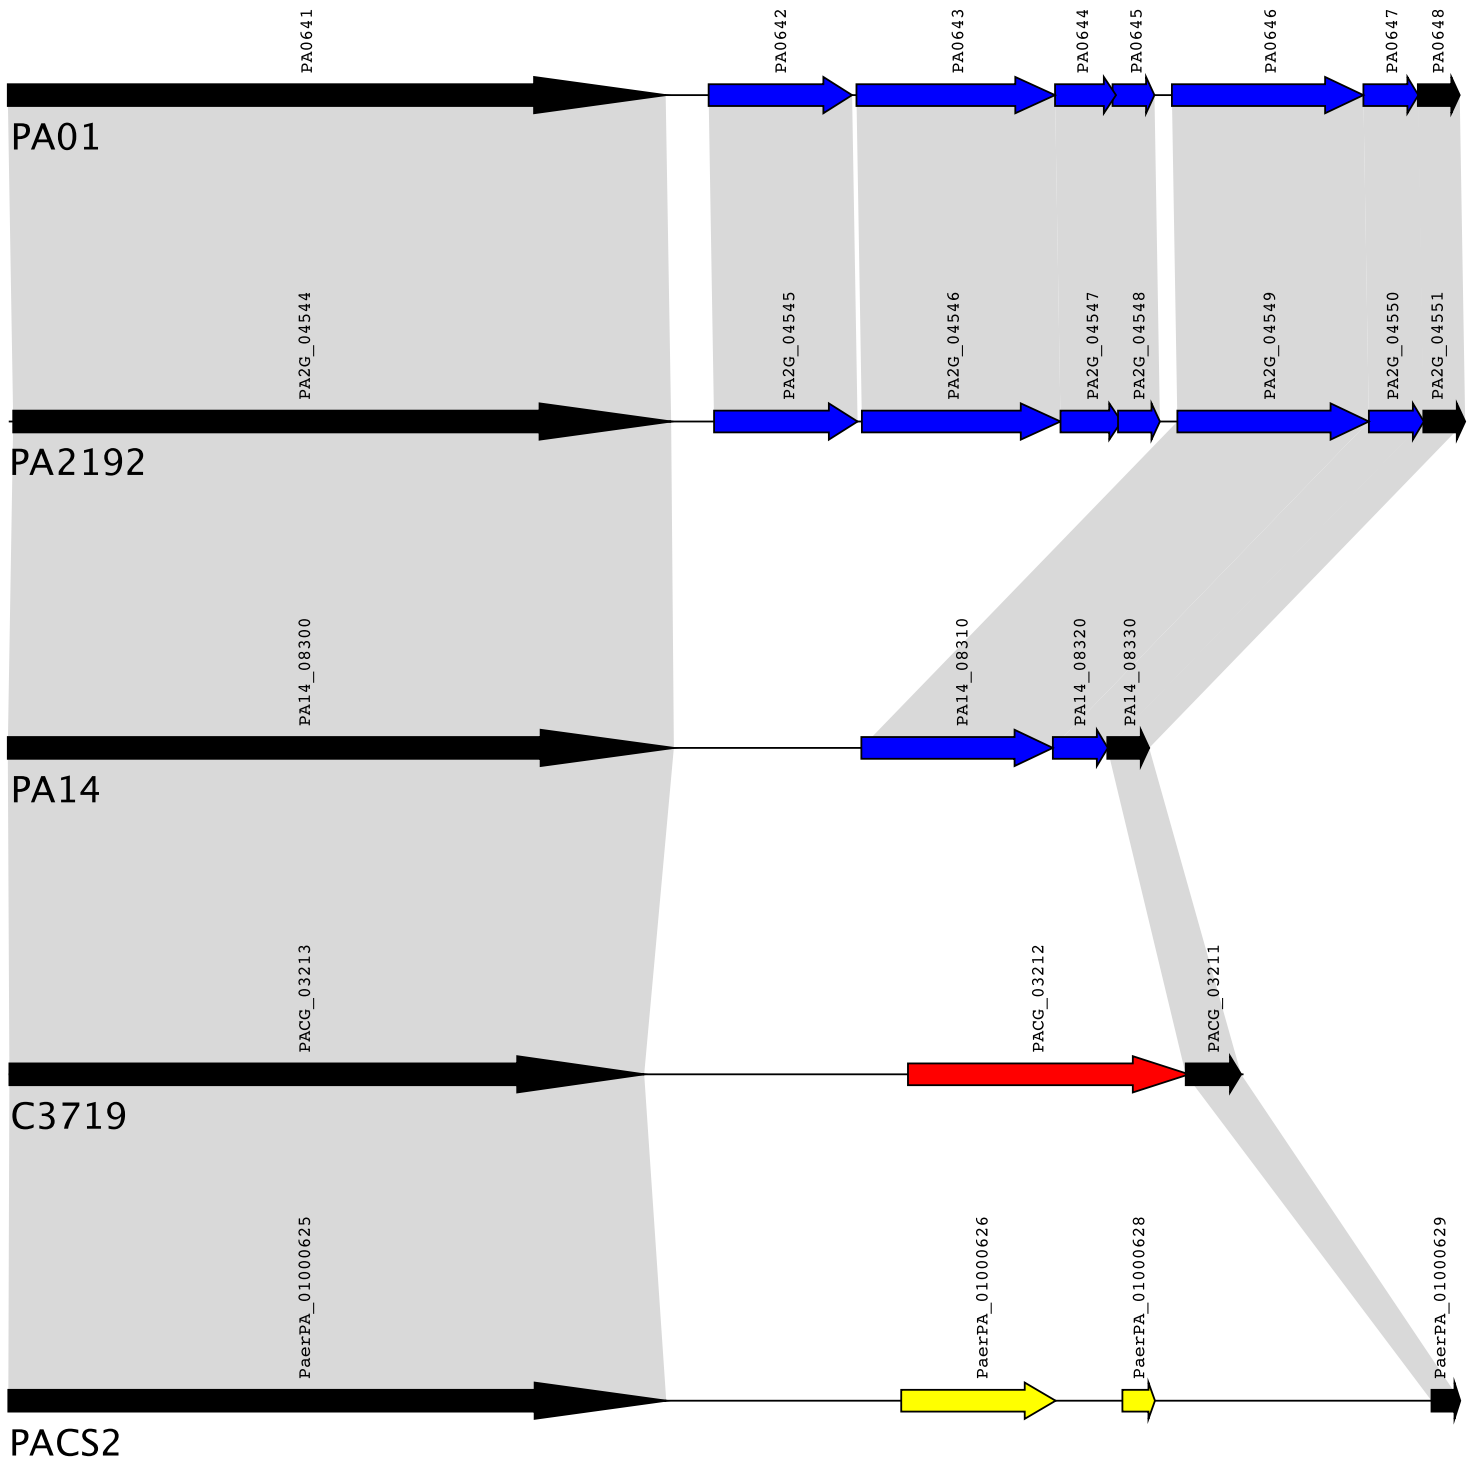

# RGP5

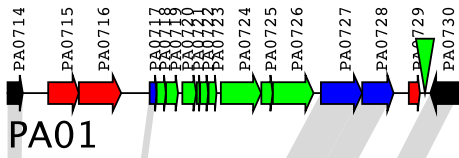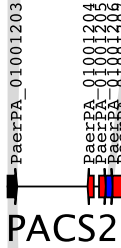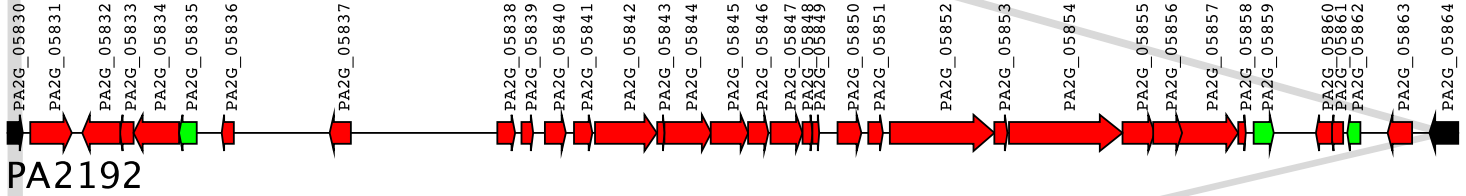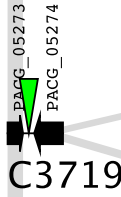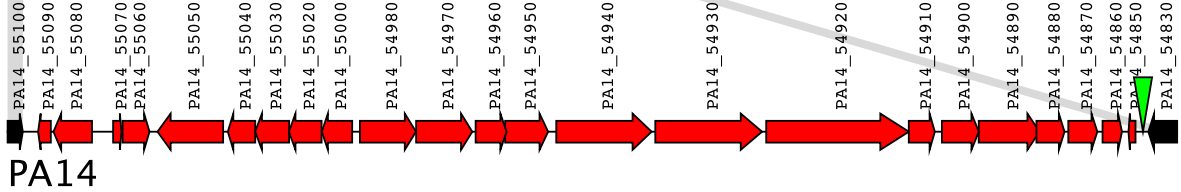

# RGP6

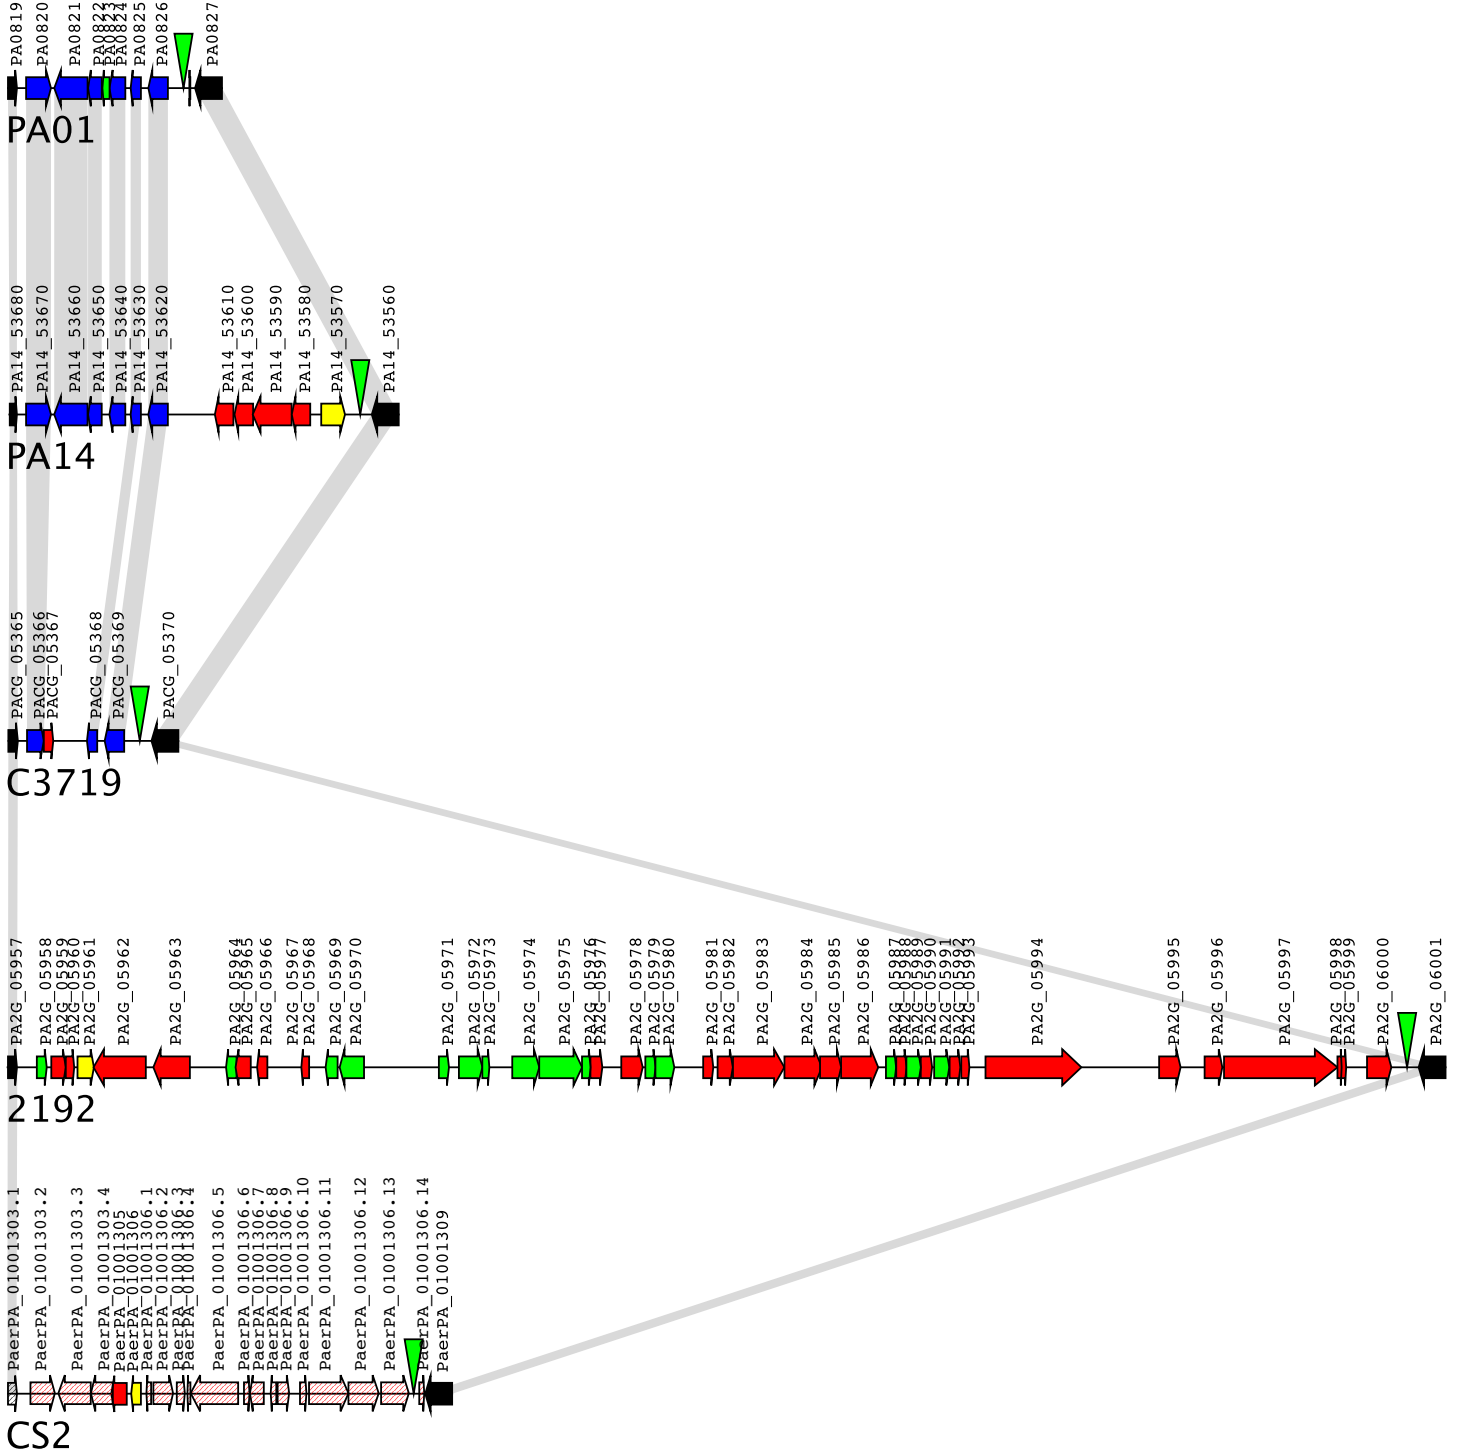

# RGP7

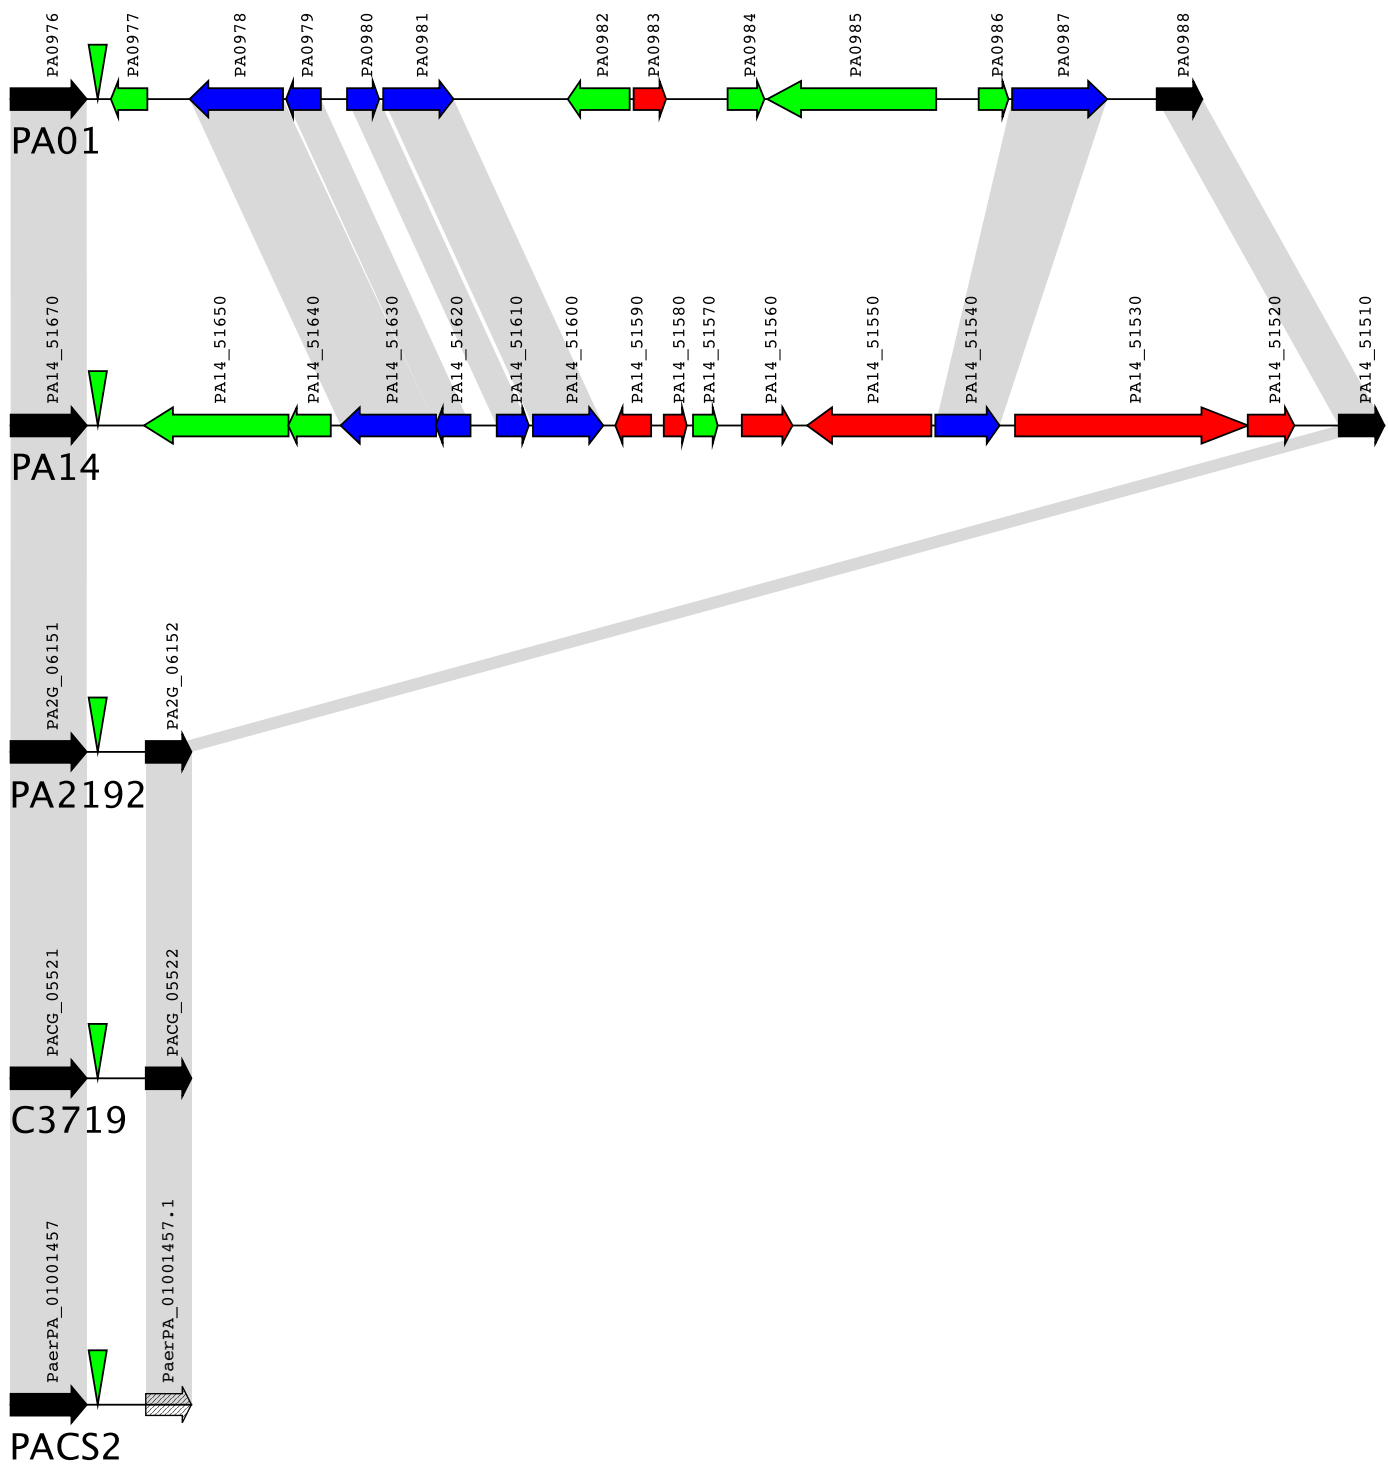

# RGP8

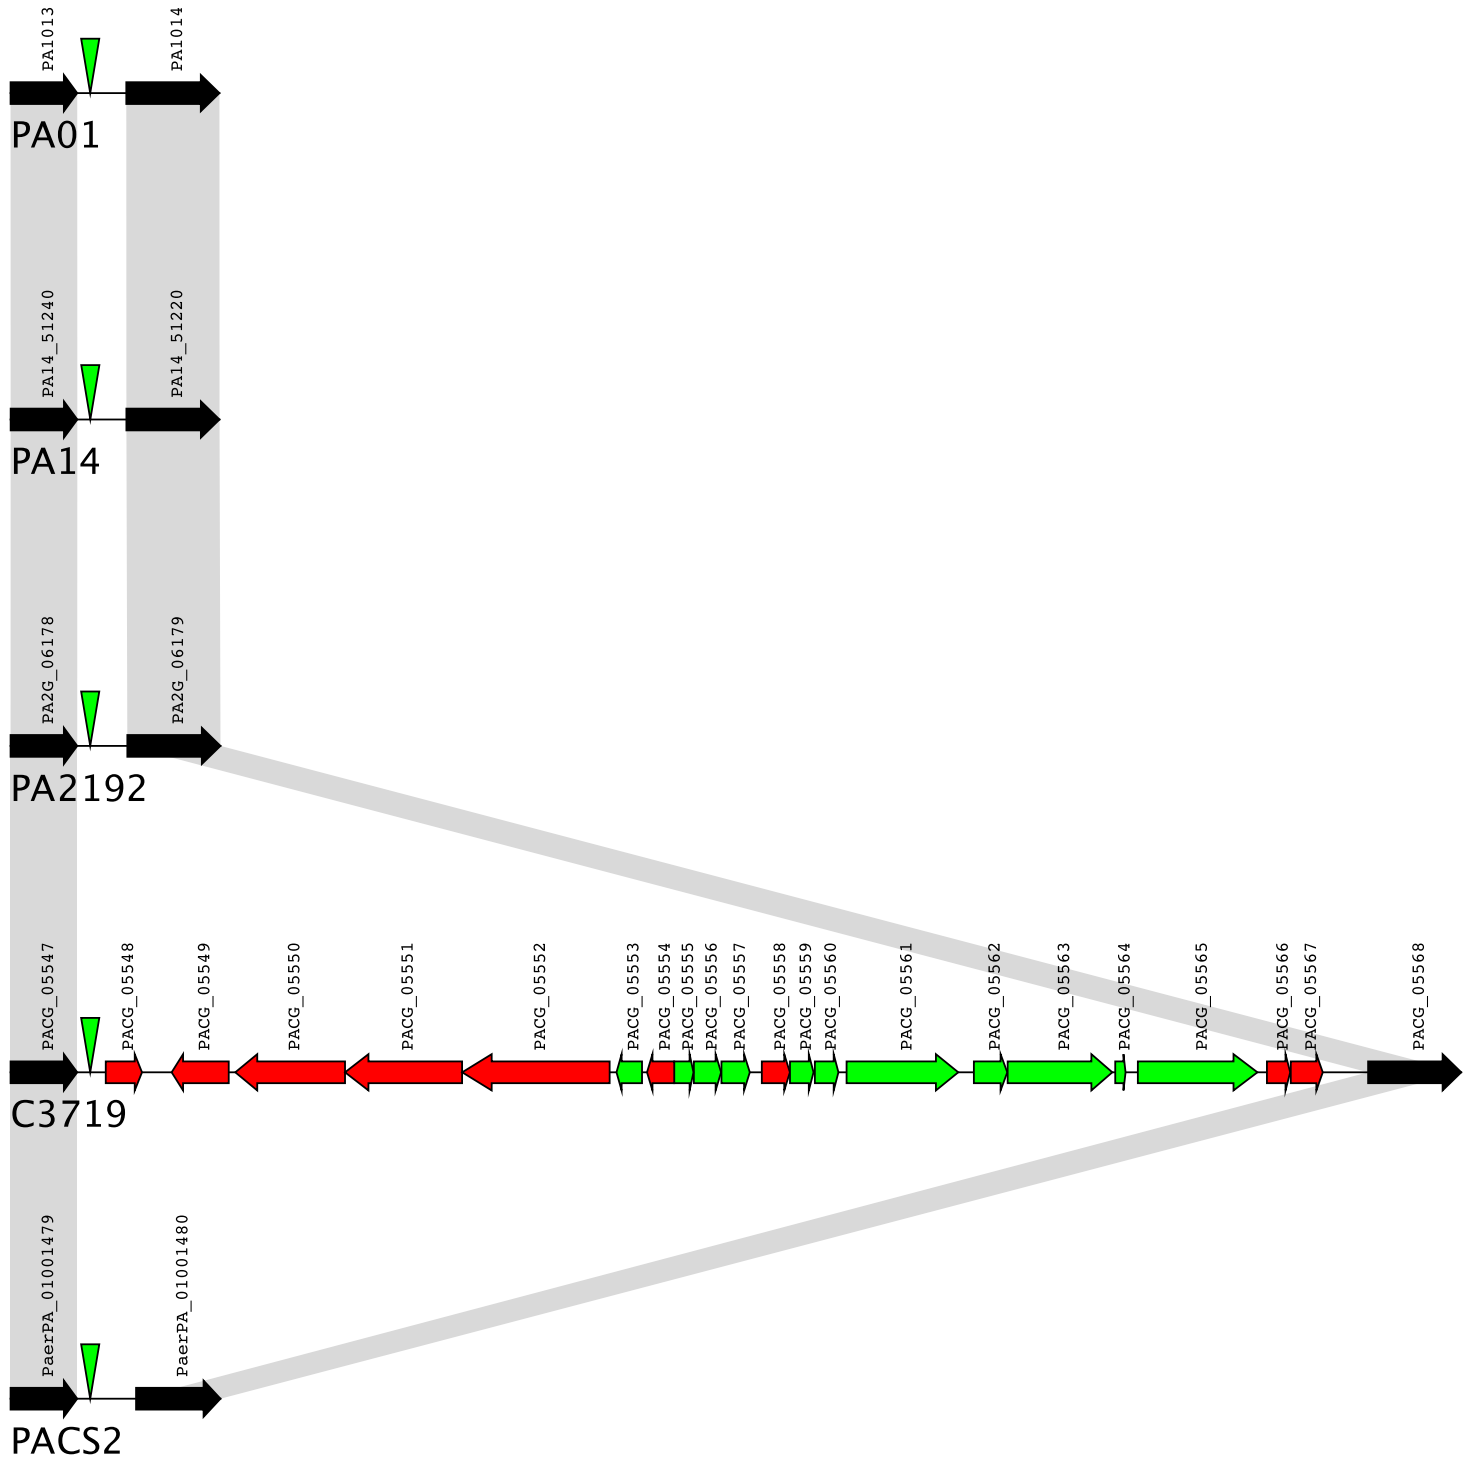



# RGP9

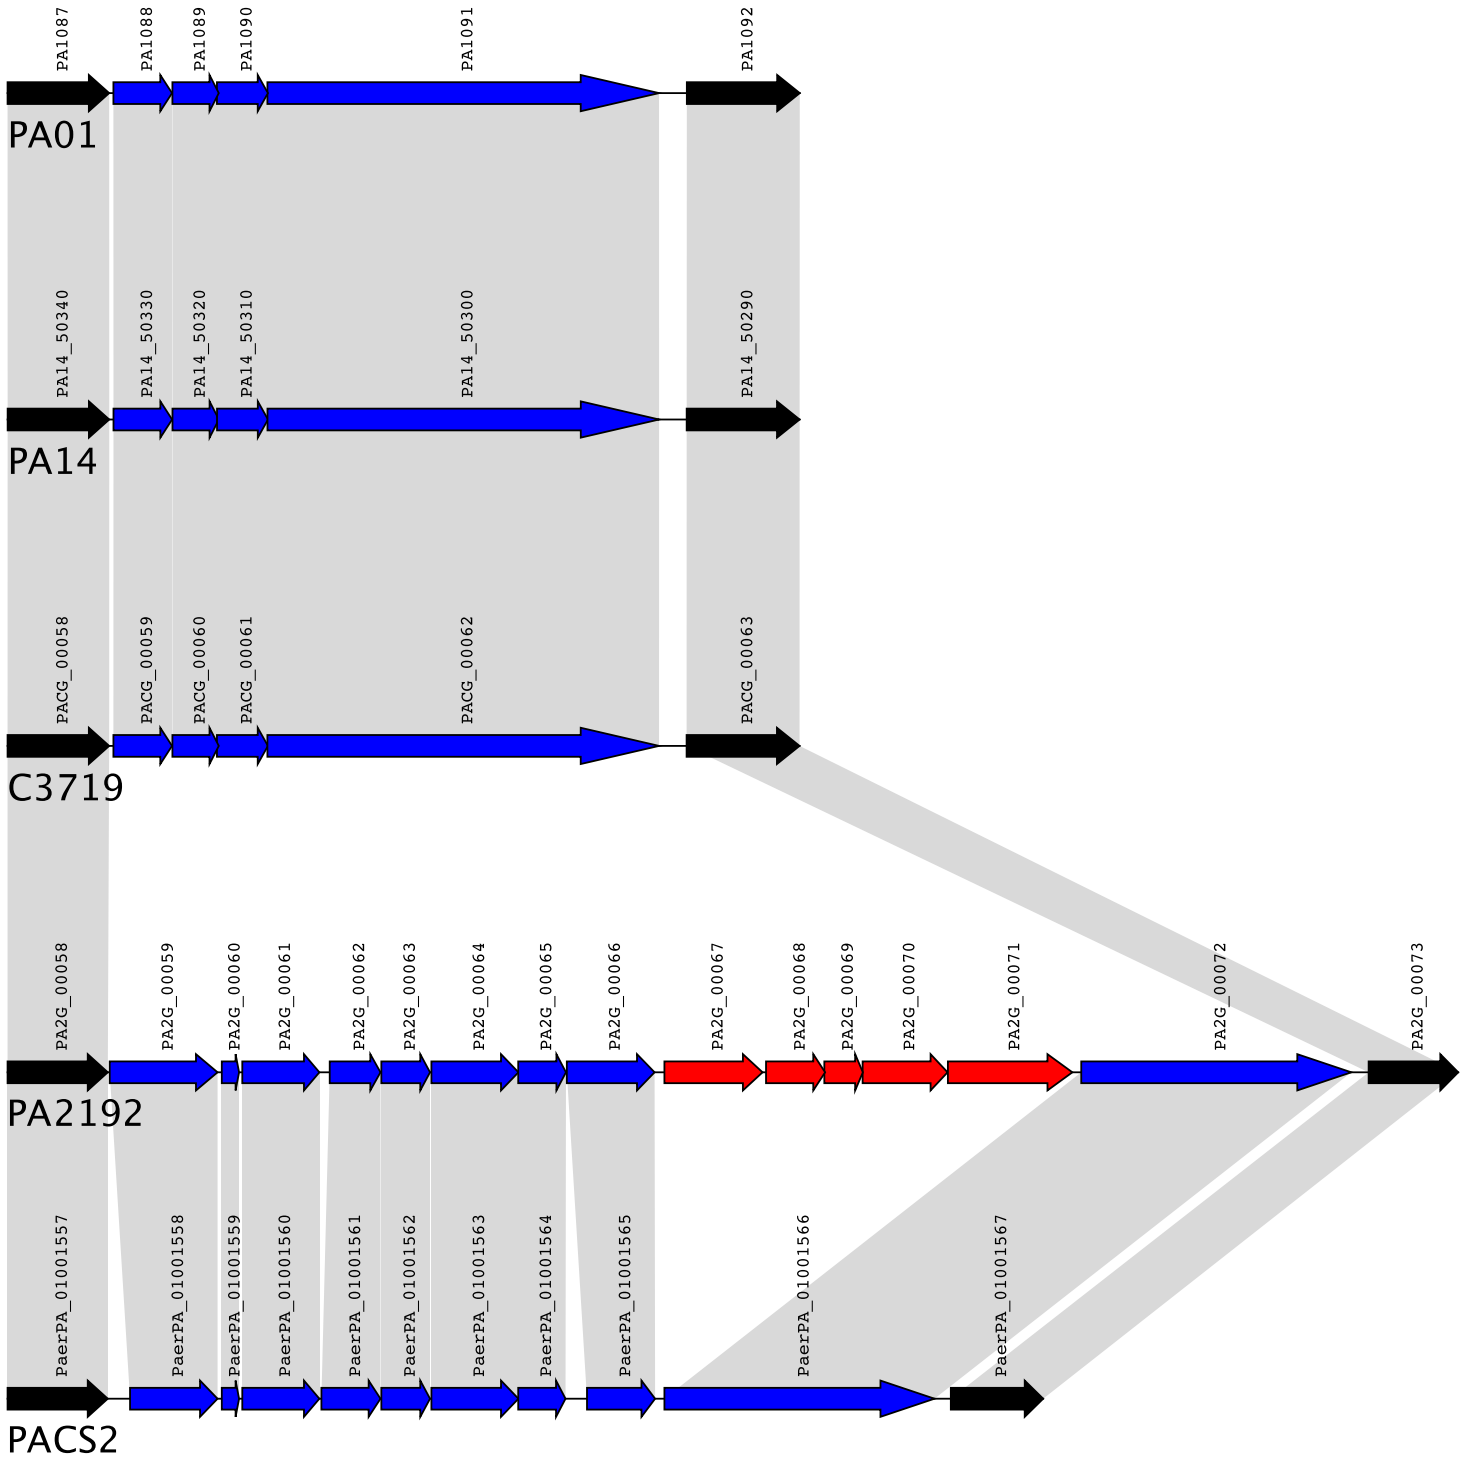

# RGP10

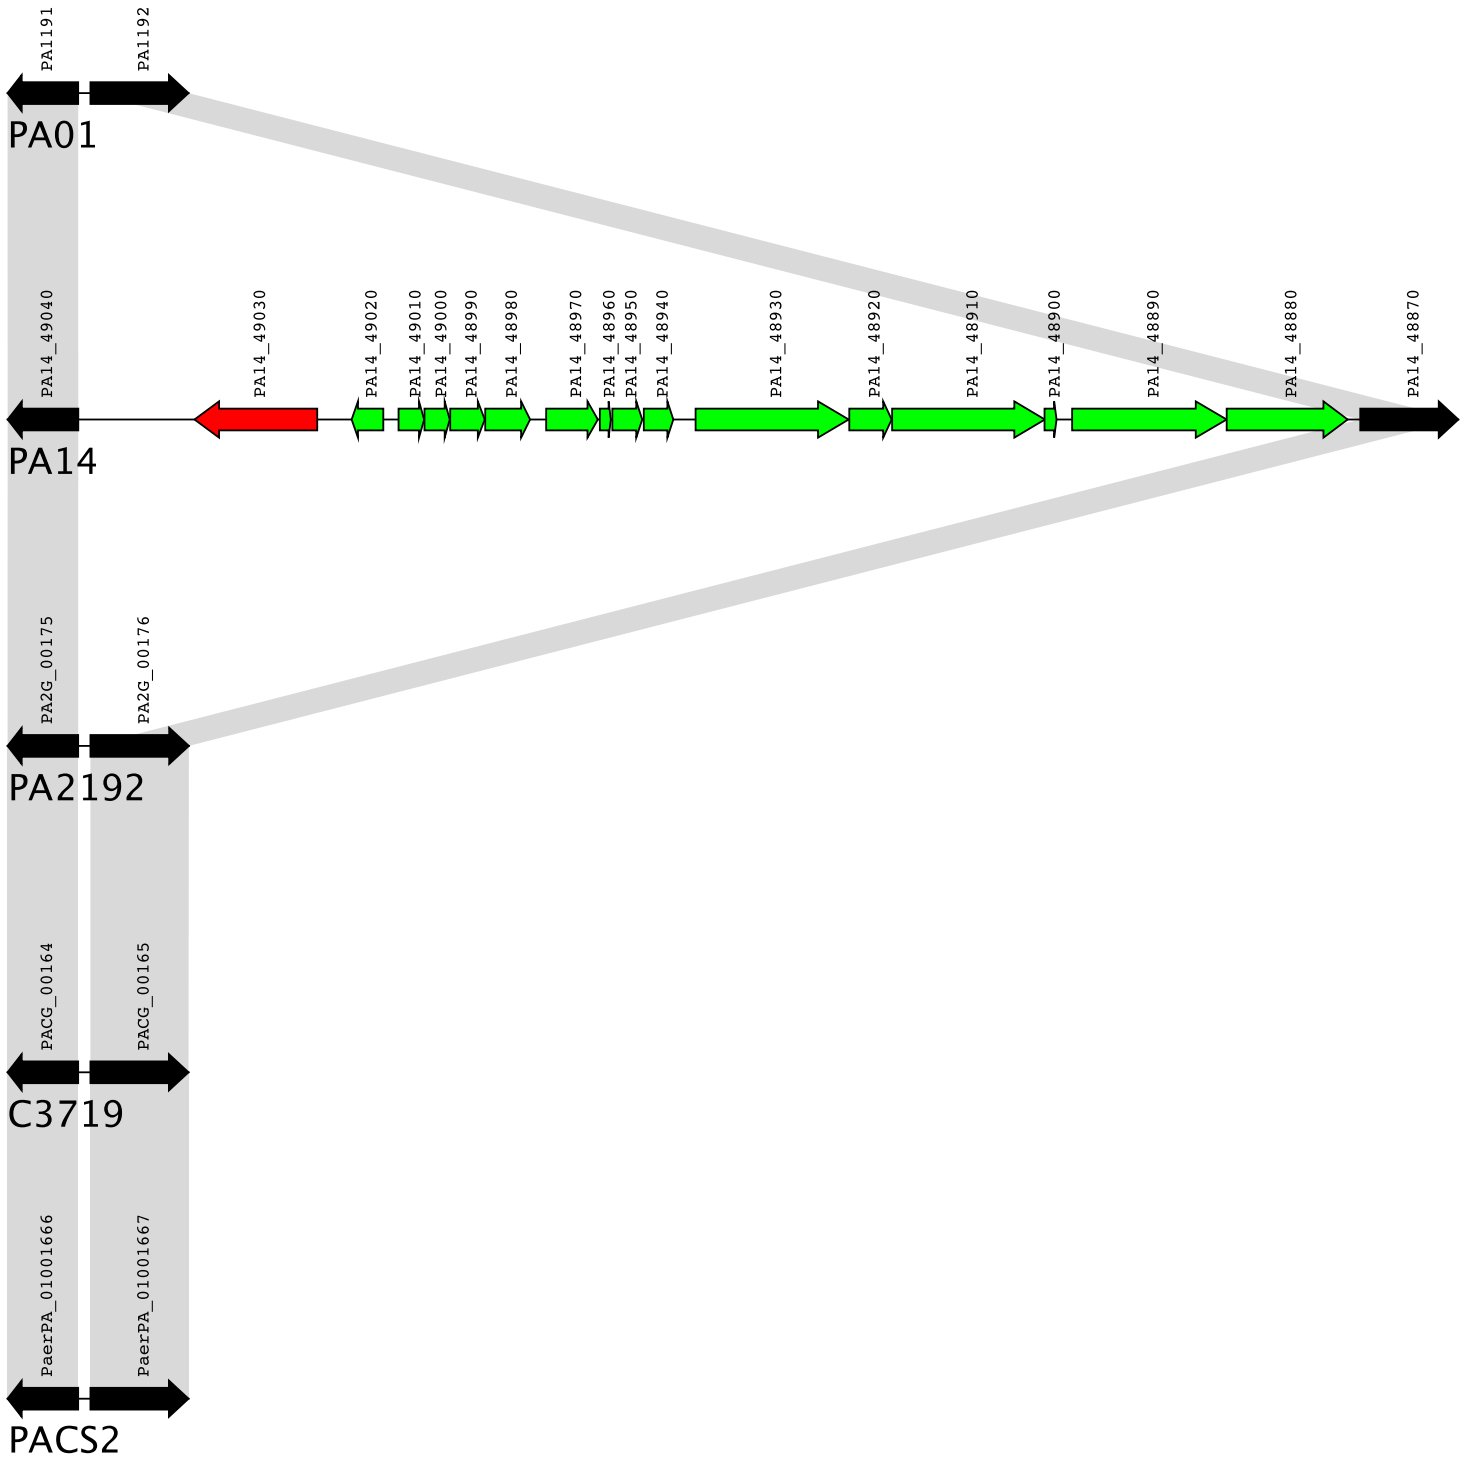

# RGP11

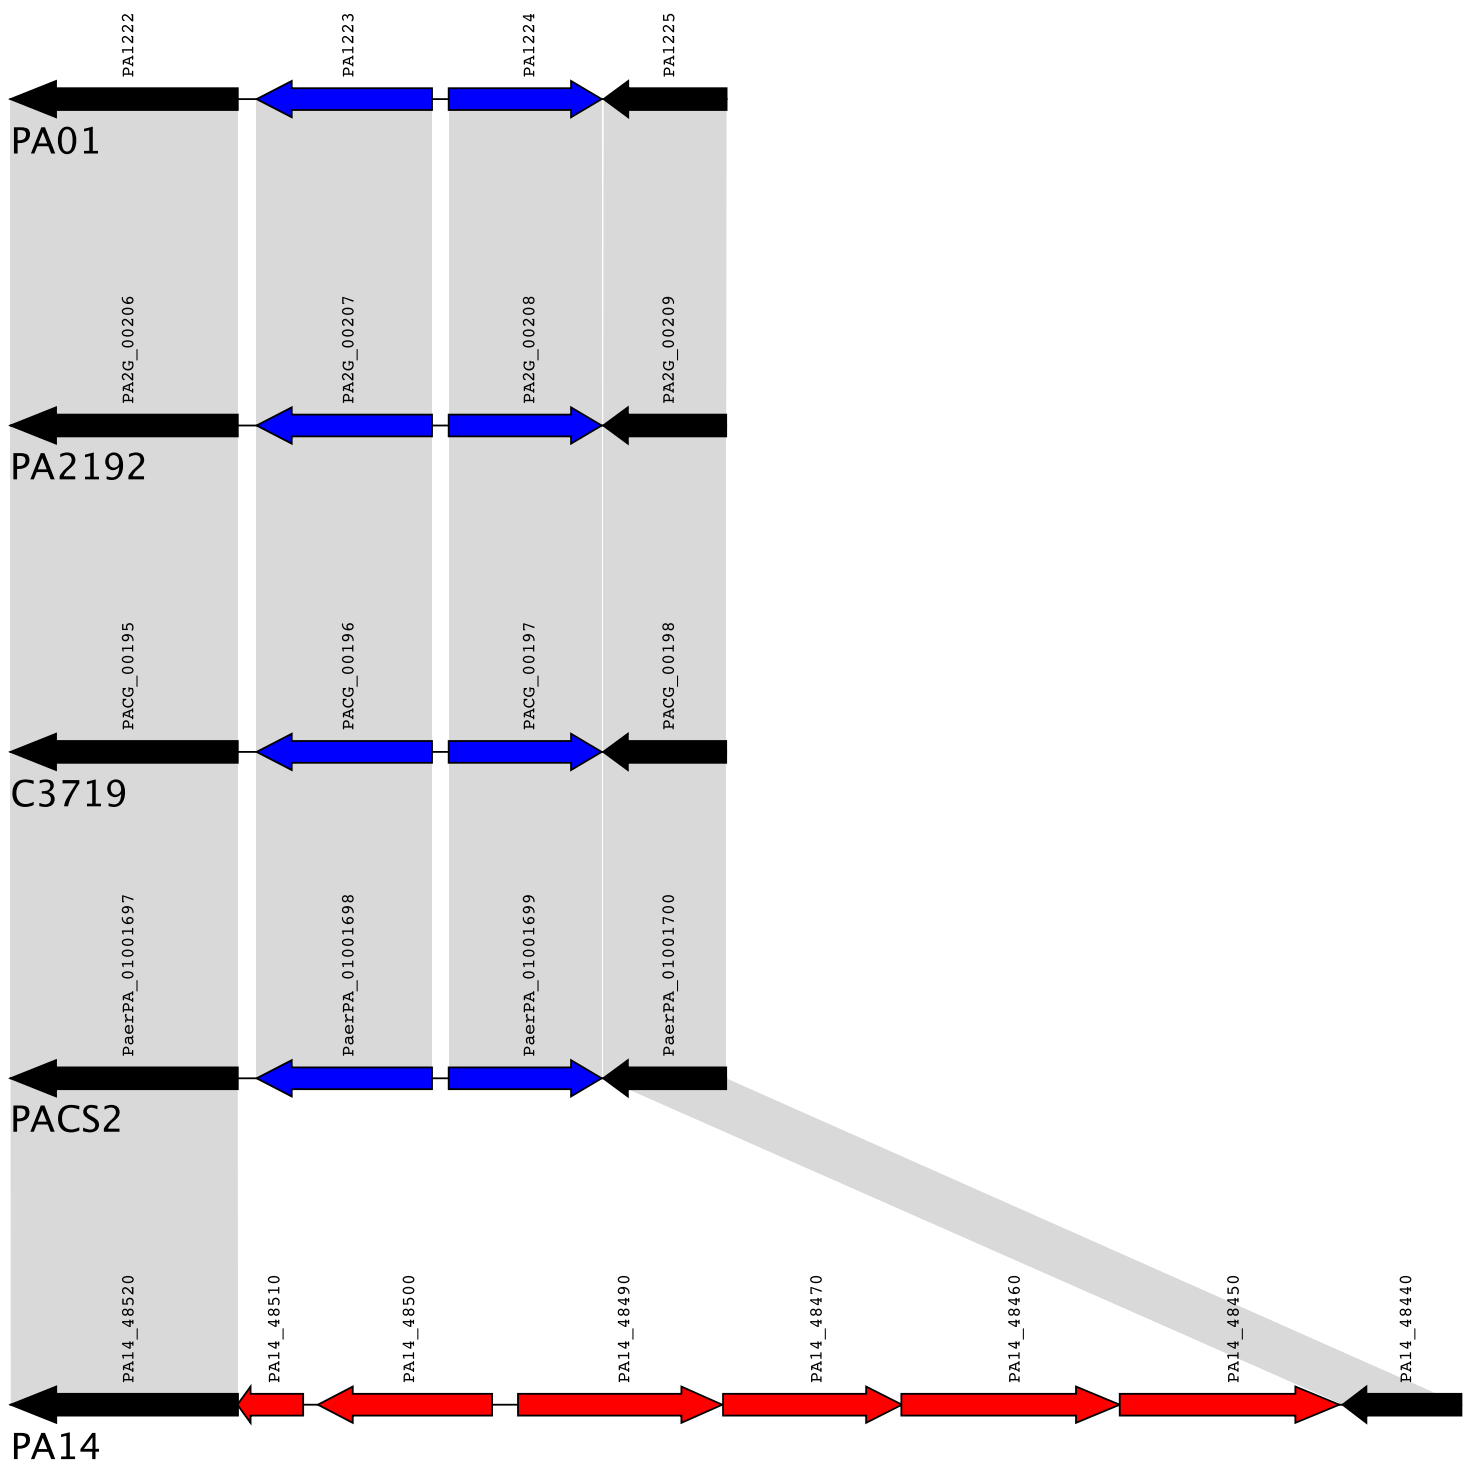

# RGP12

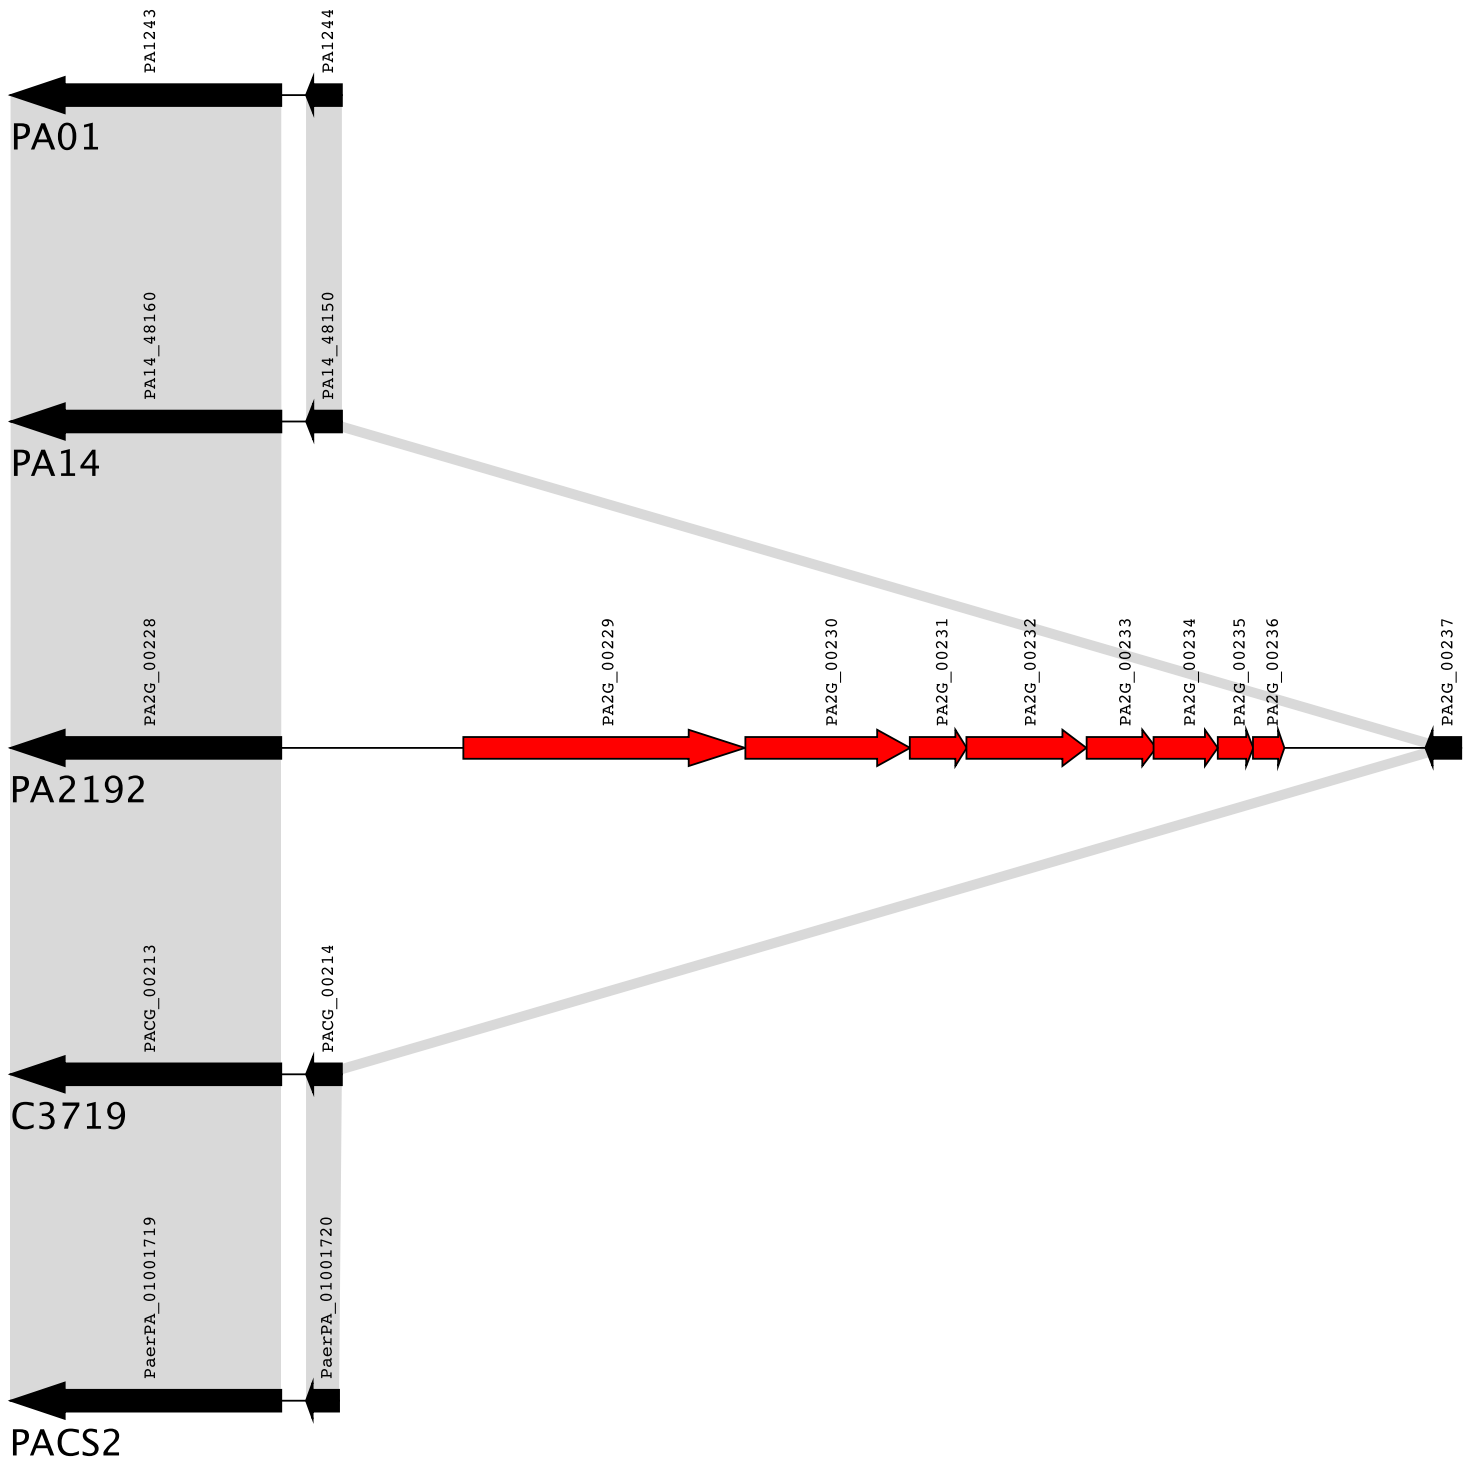

# RGP13

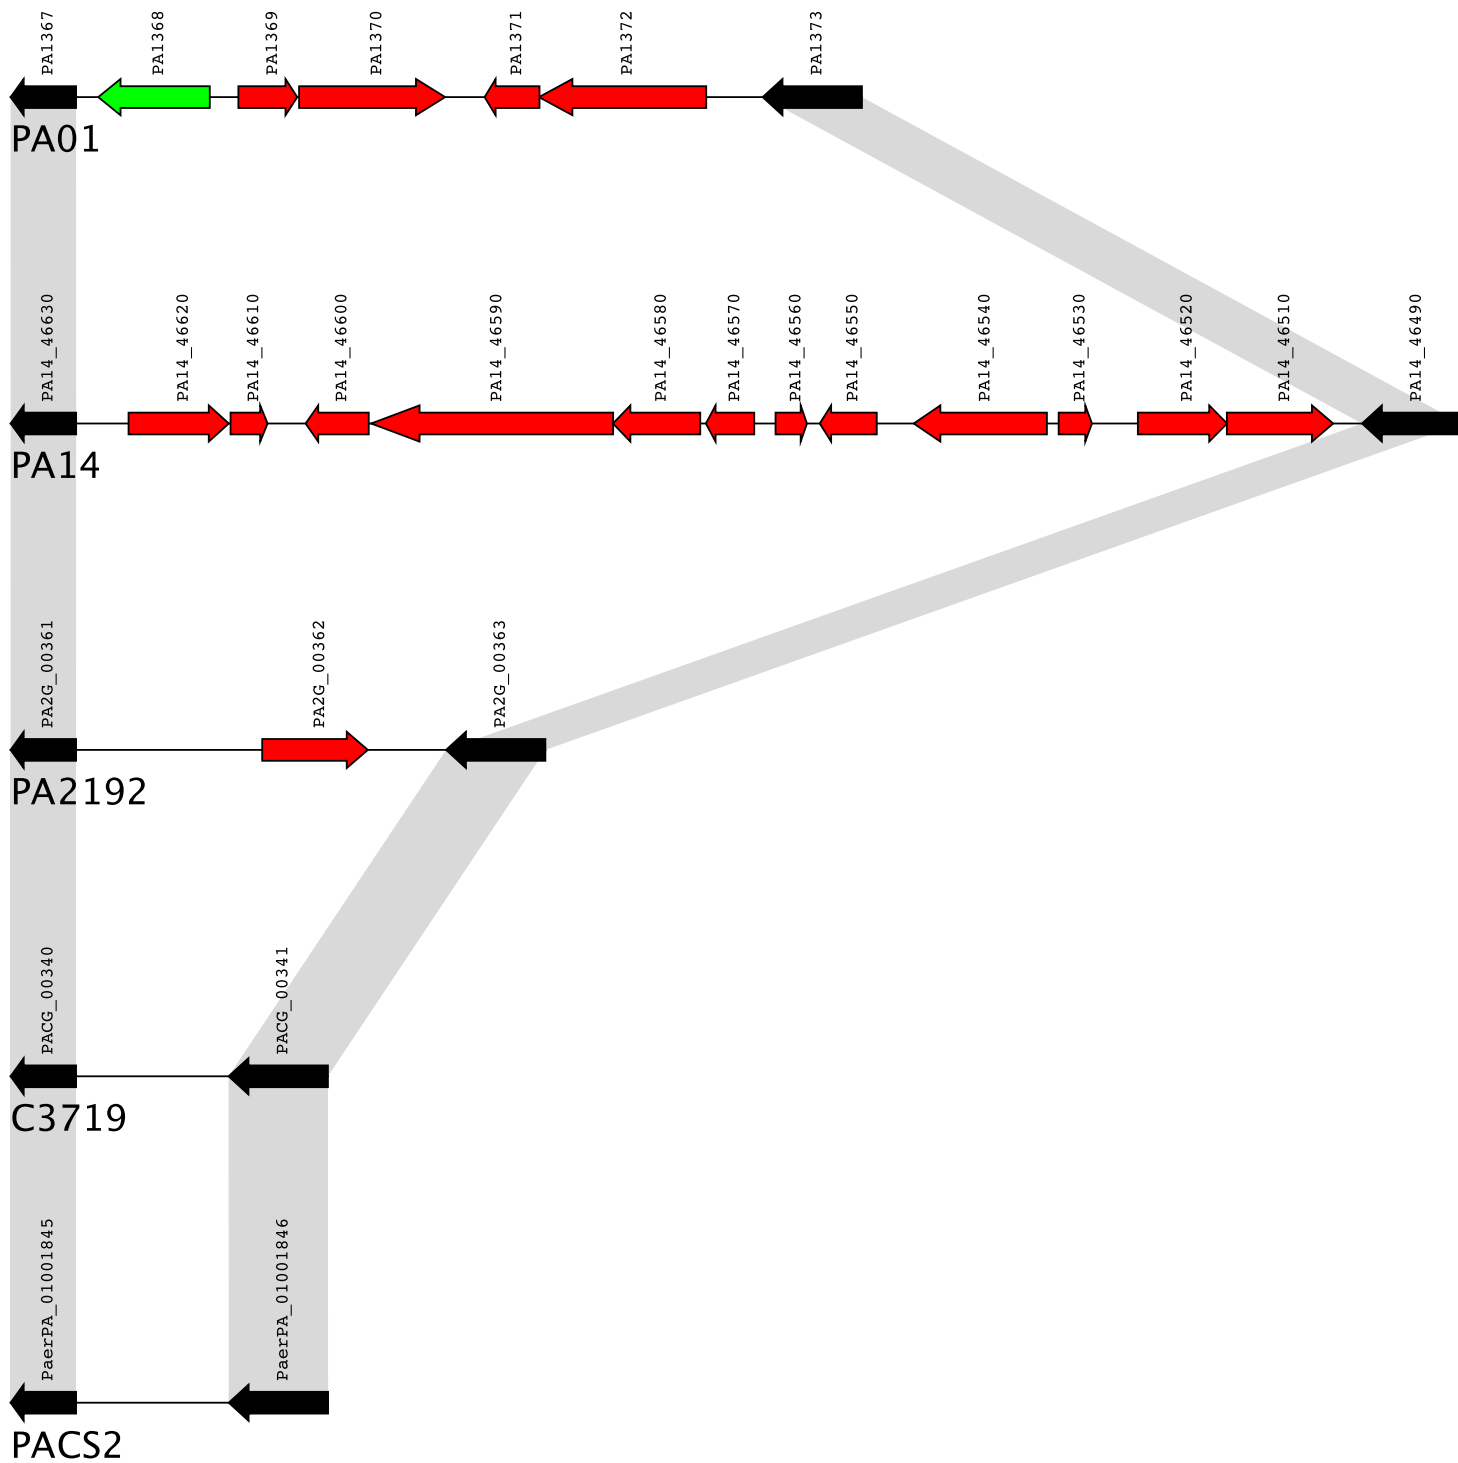

# RGP14

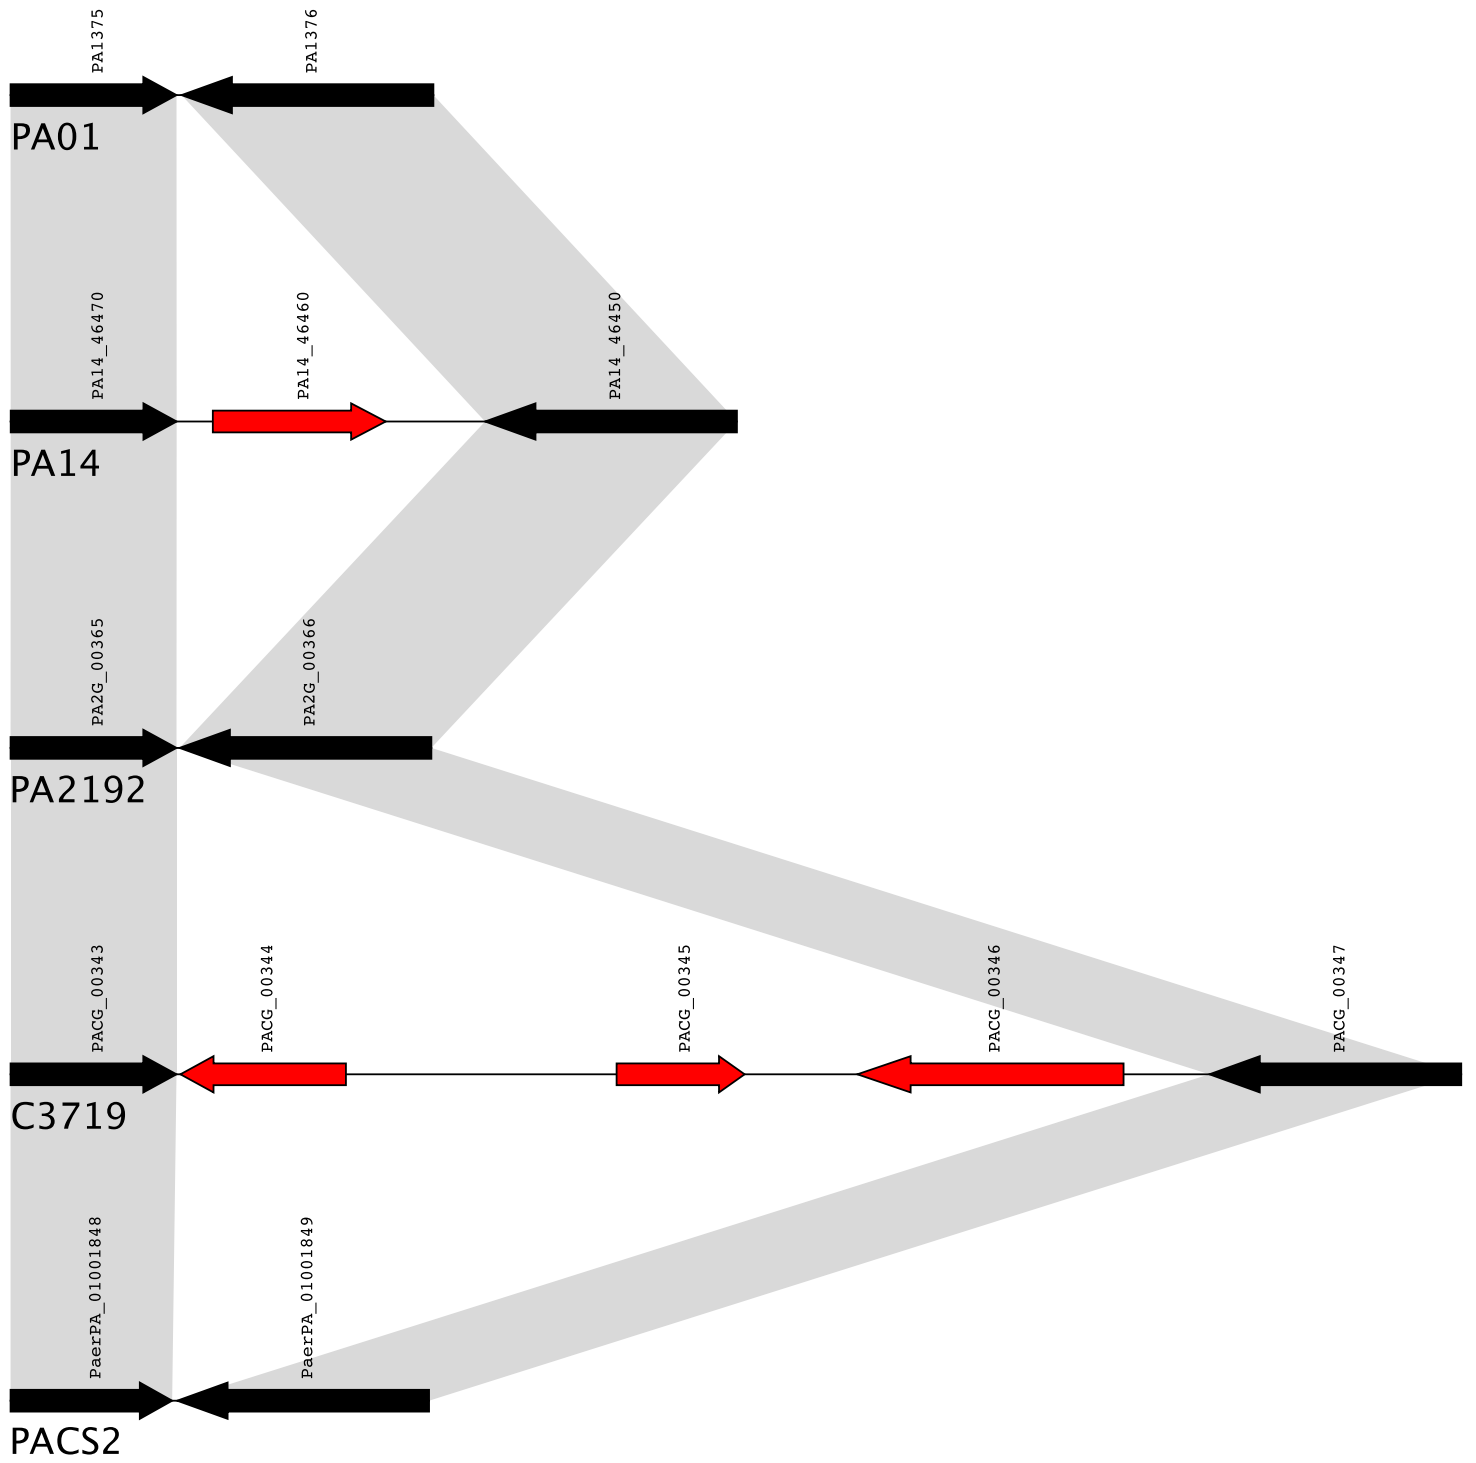

# RGP15

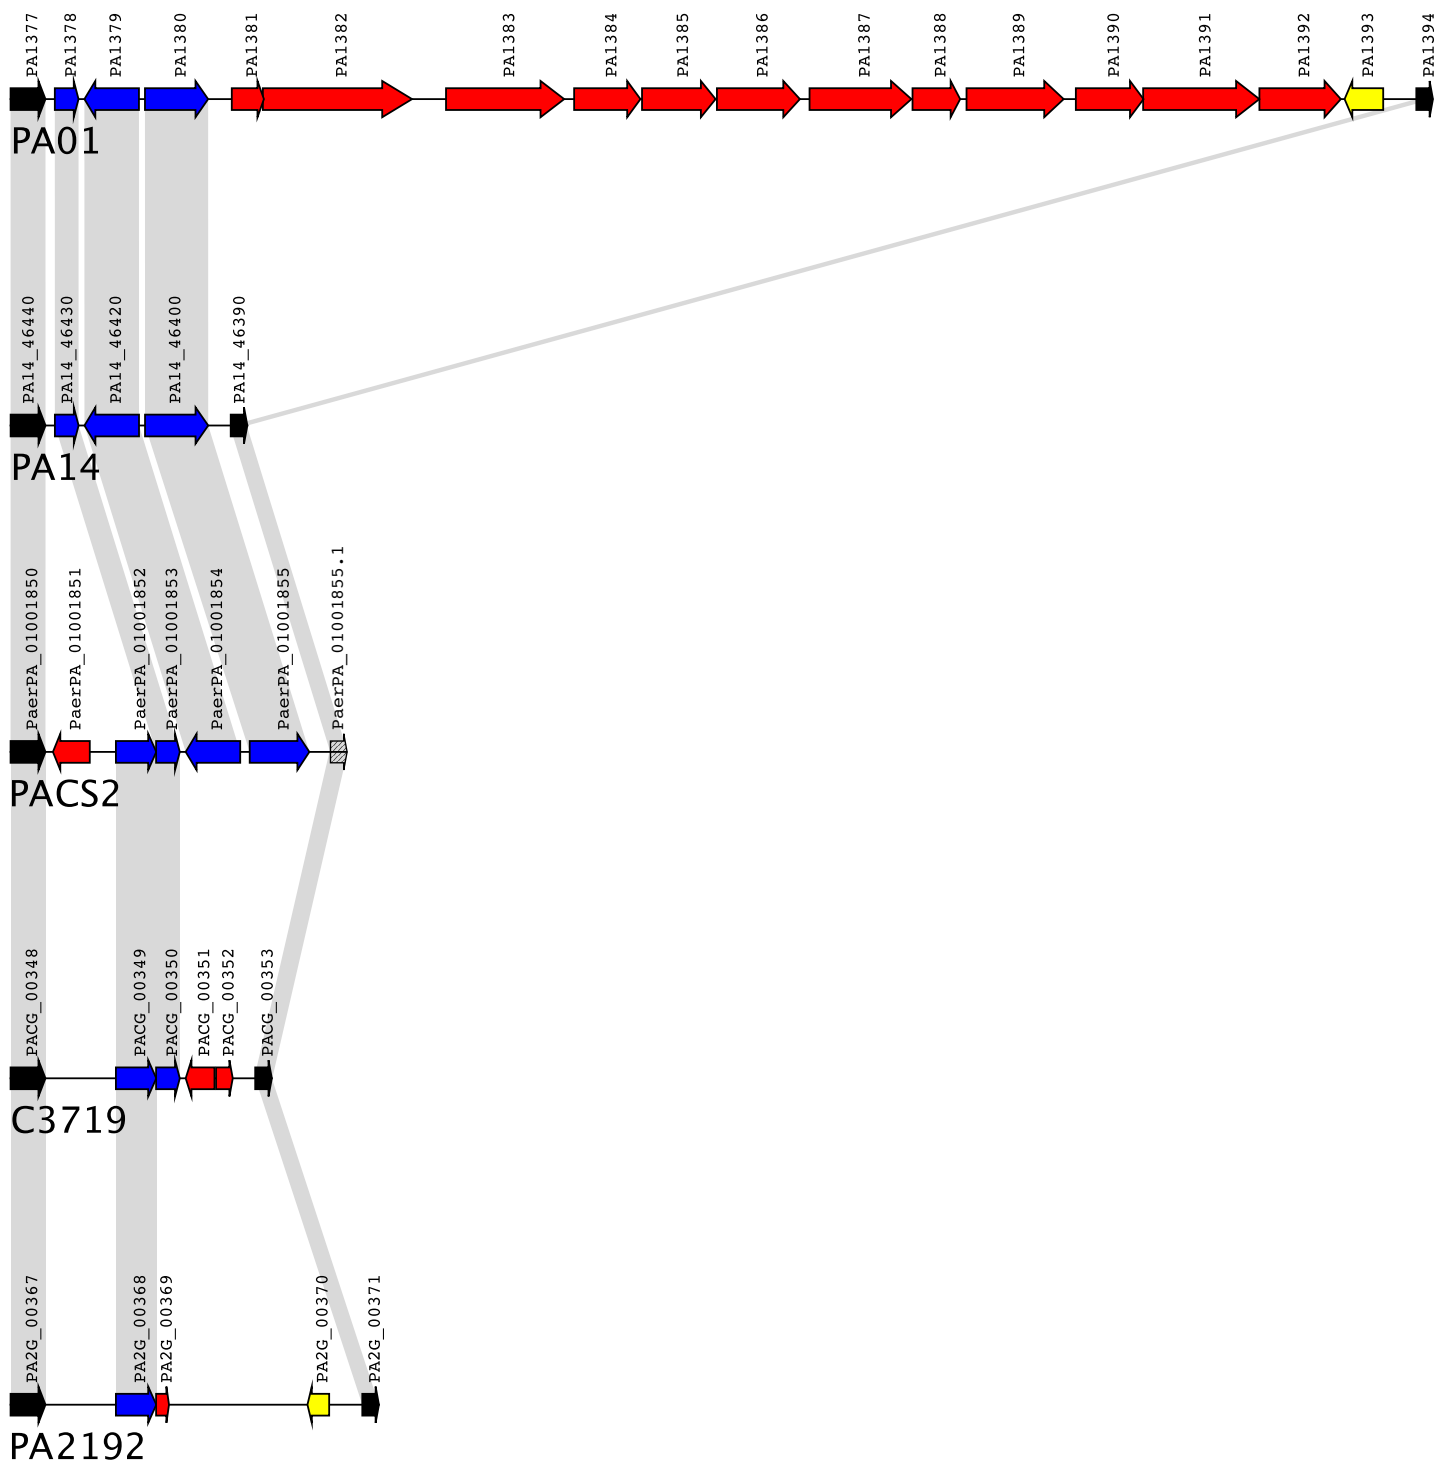

# RGP16

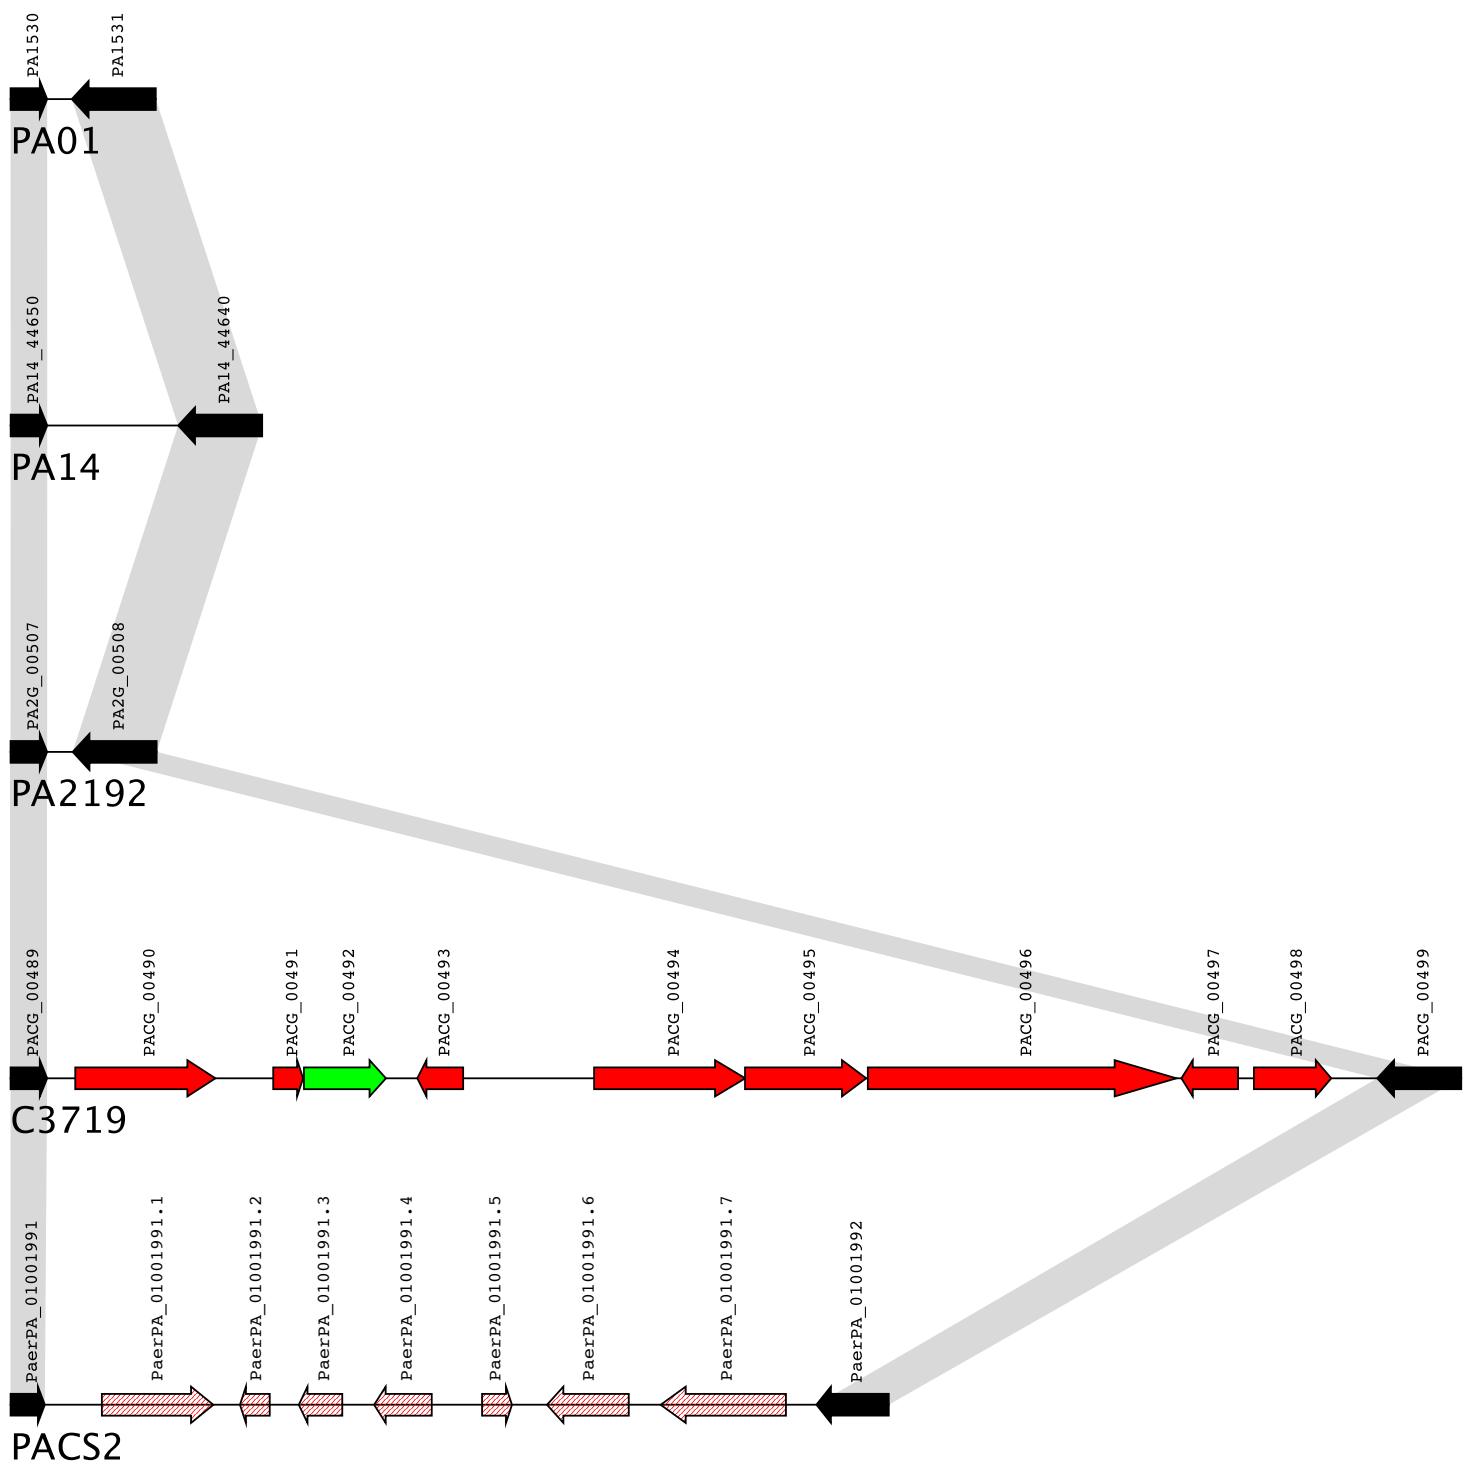



# RGP17

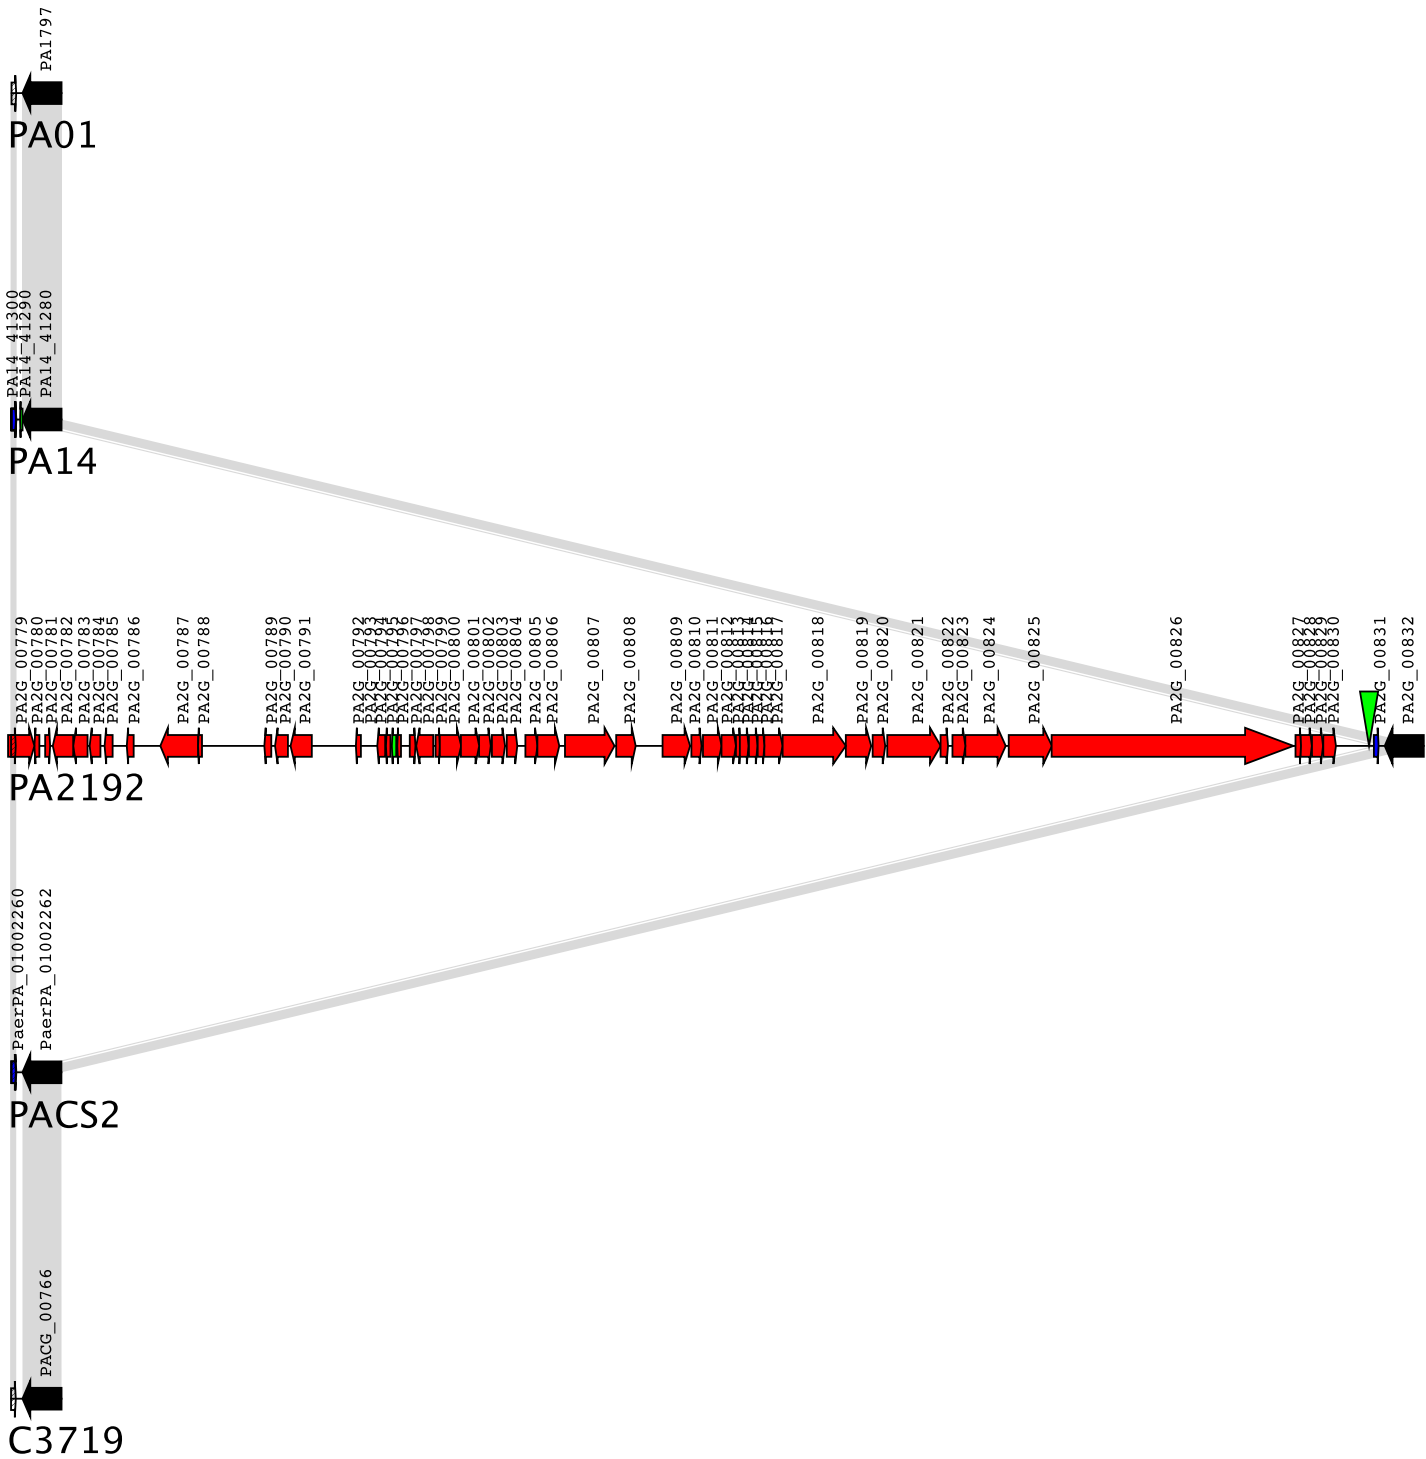

# RGP19

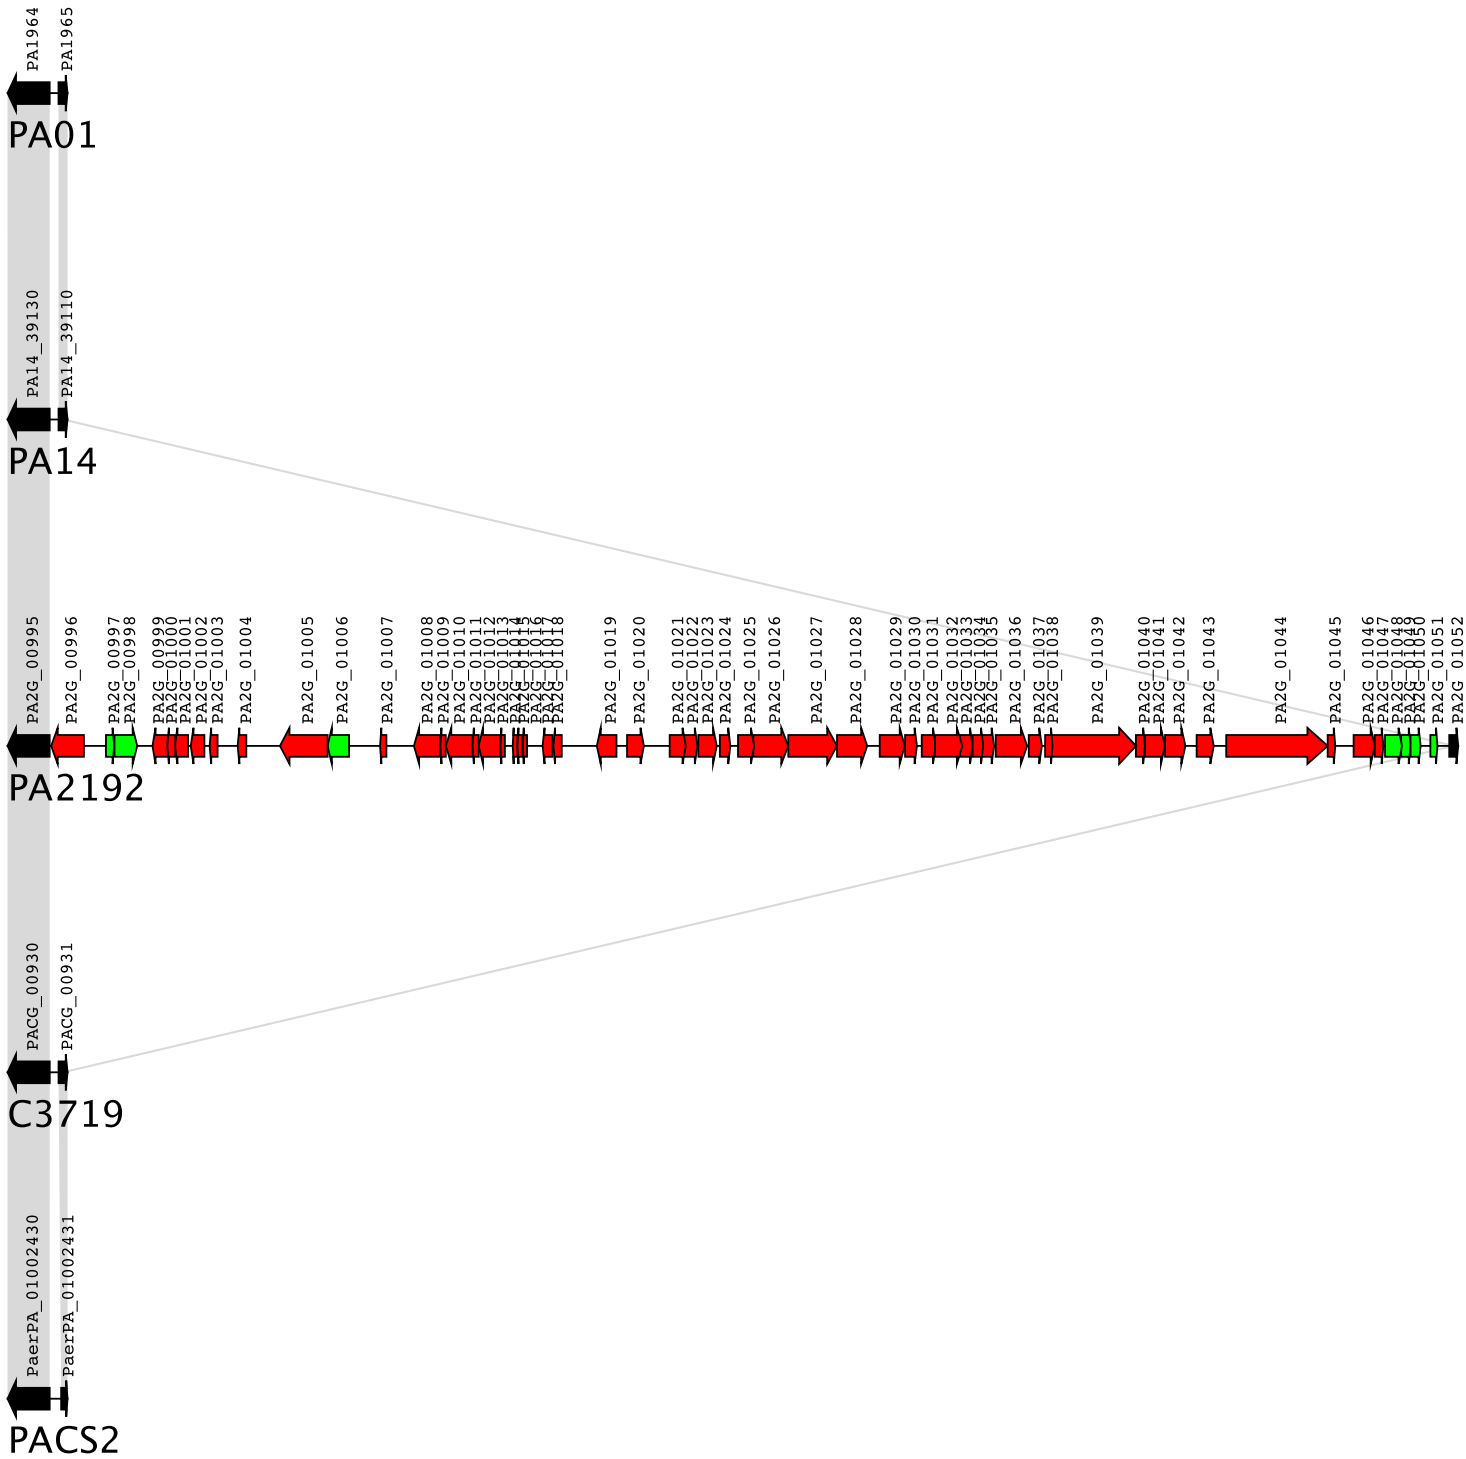

Supplement: pnas_0711982105_4.pdf [file pnas_0711982105_4.pdf]

# RGP21

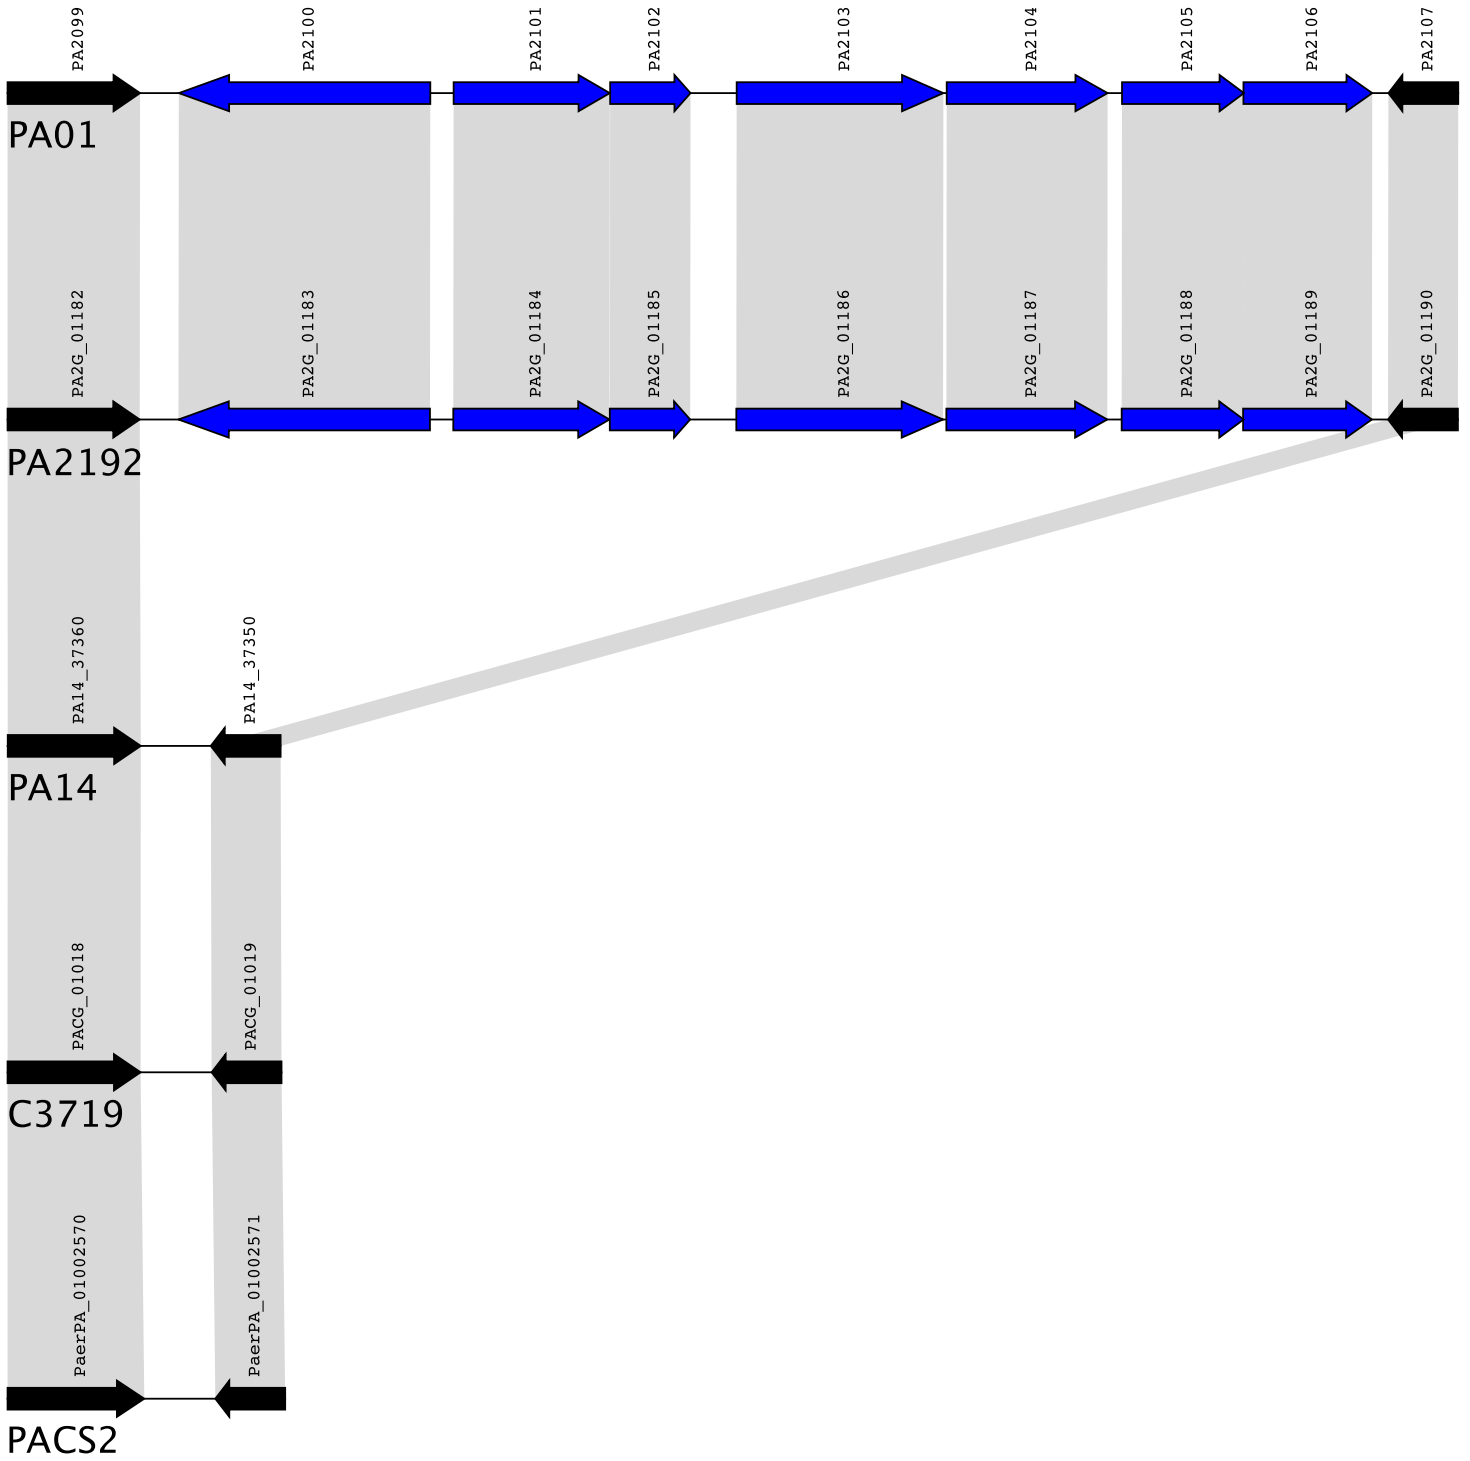

# RGP22

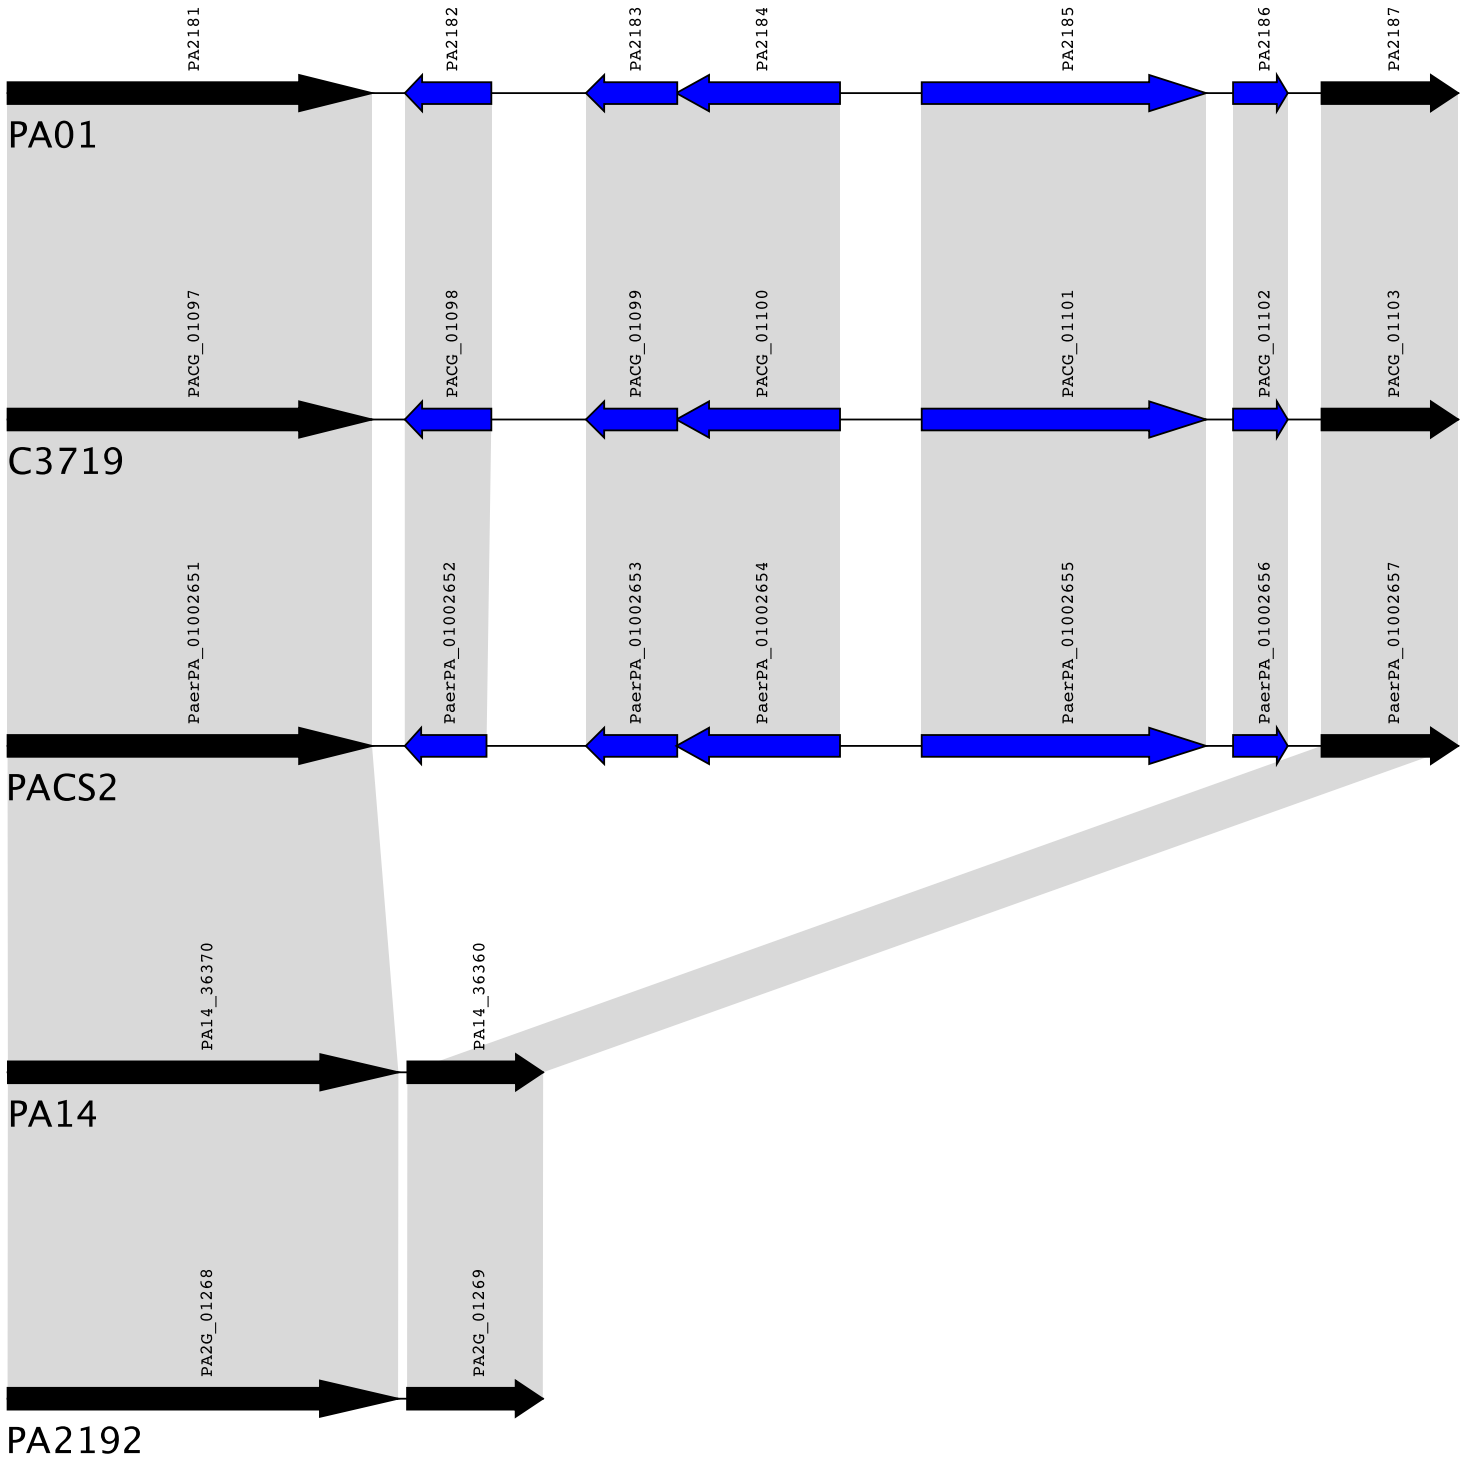



# RGP24

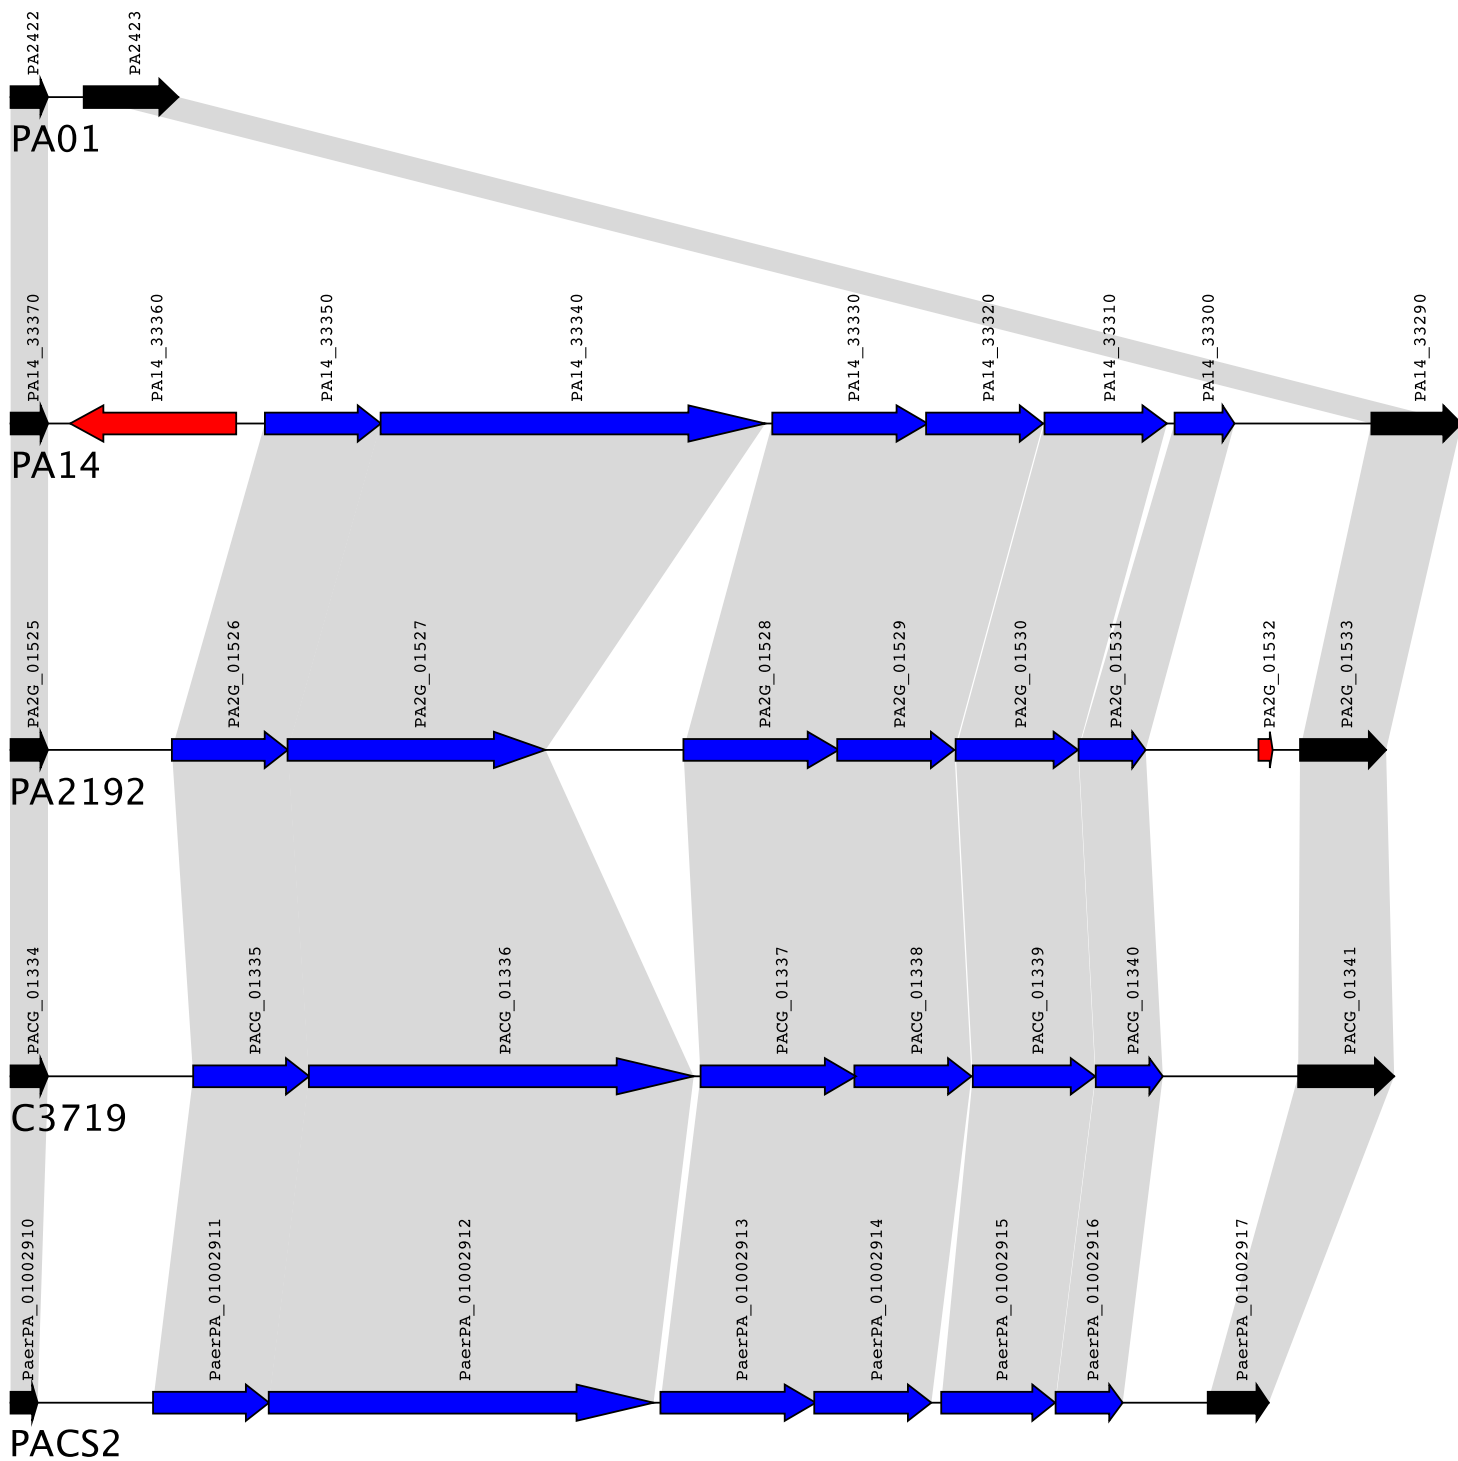

# RGP25

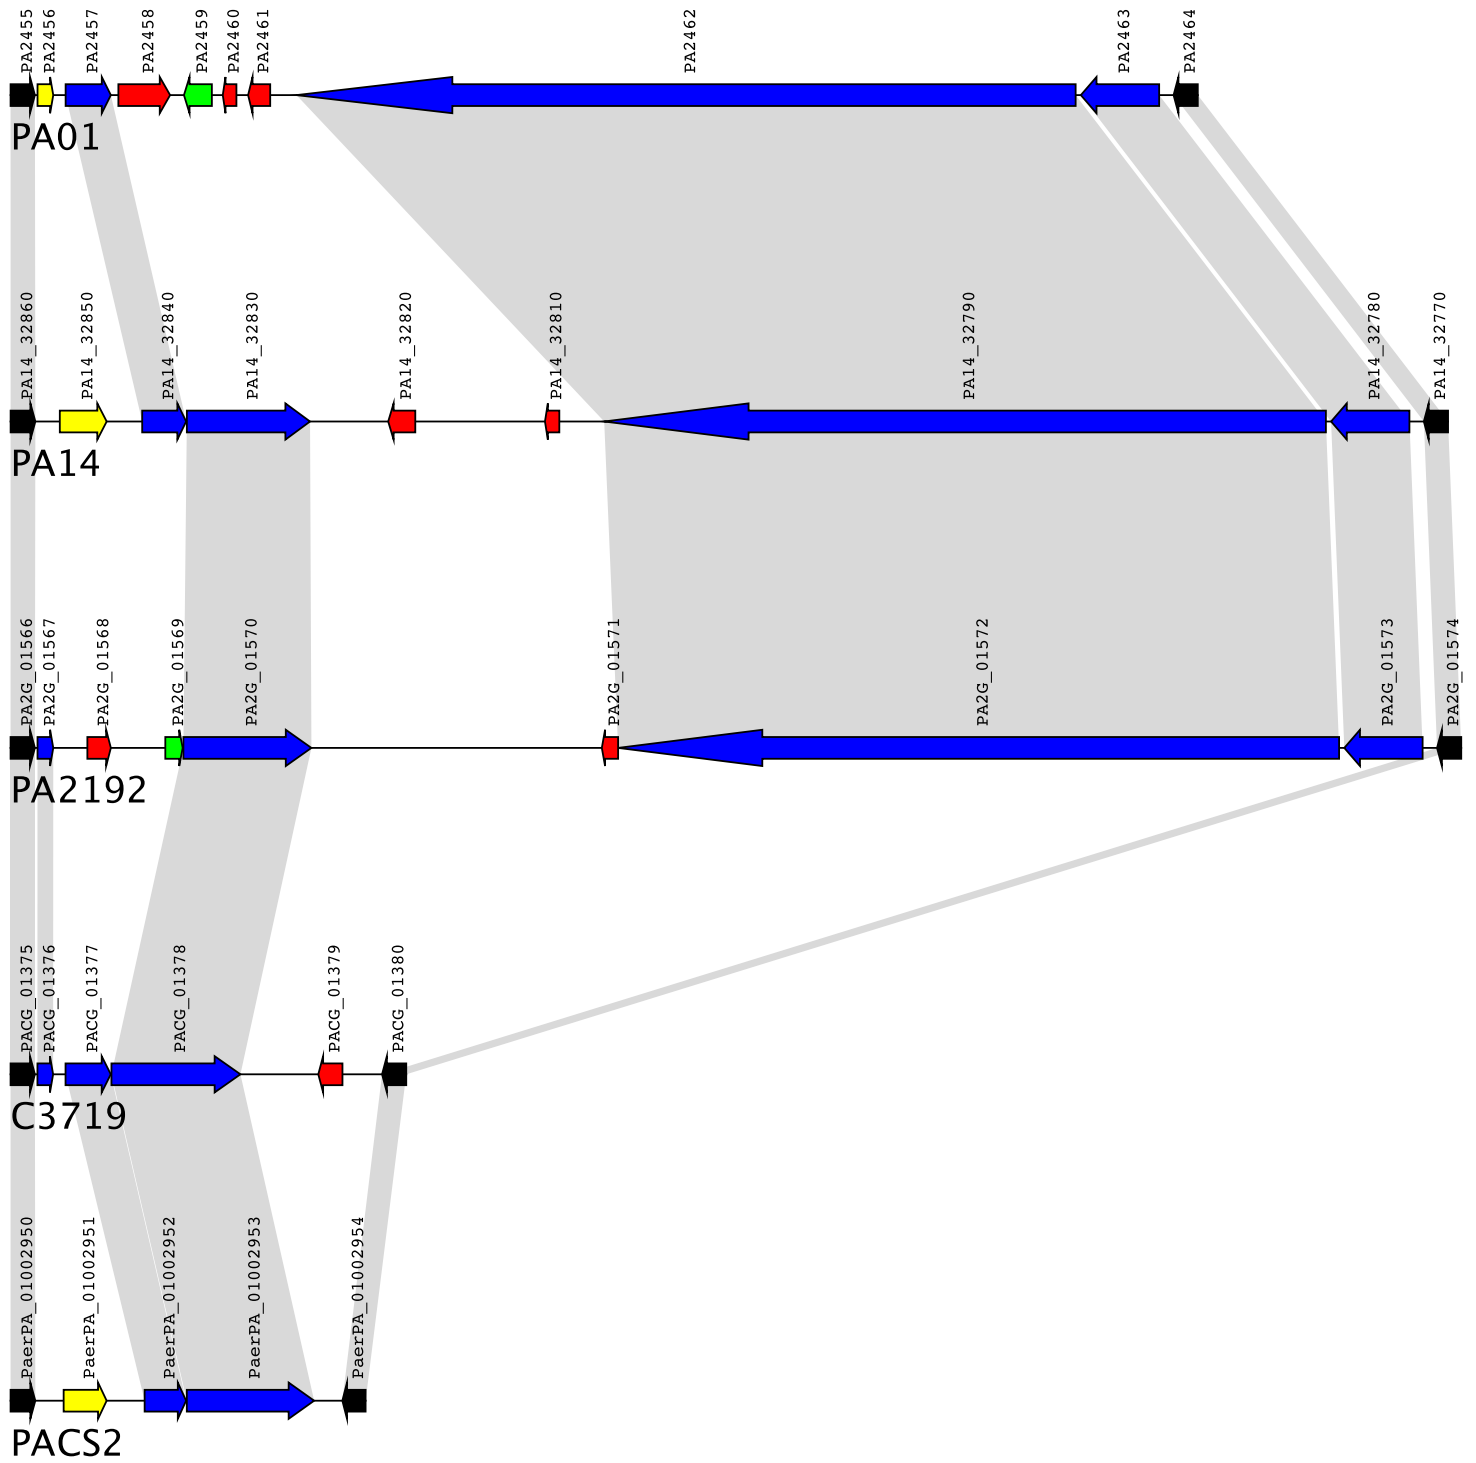

# RGP26

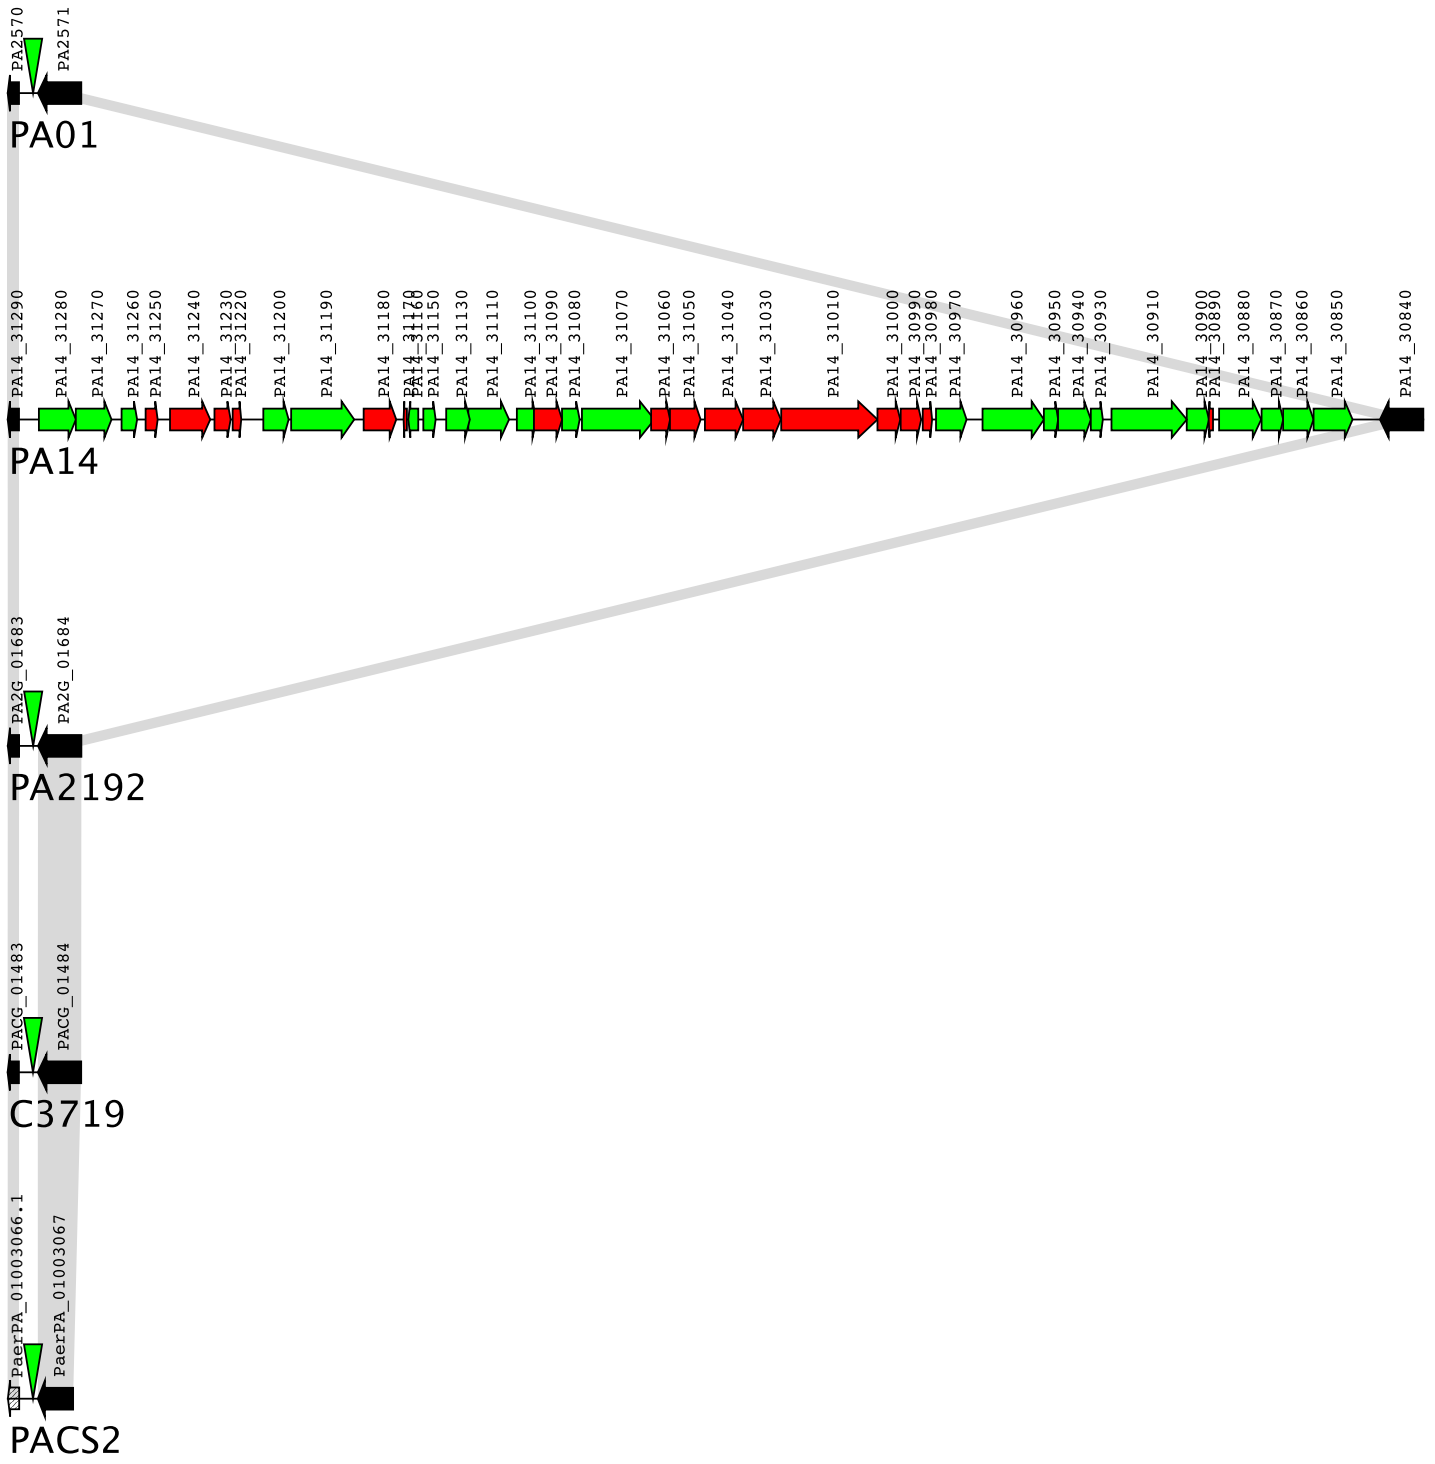

# RGP27

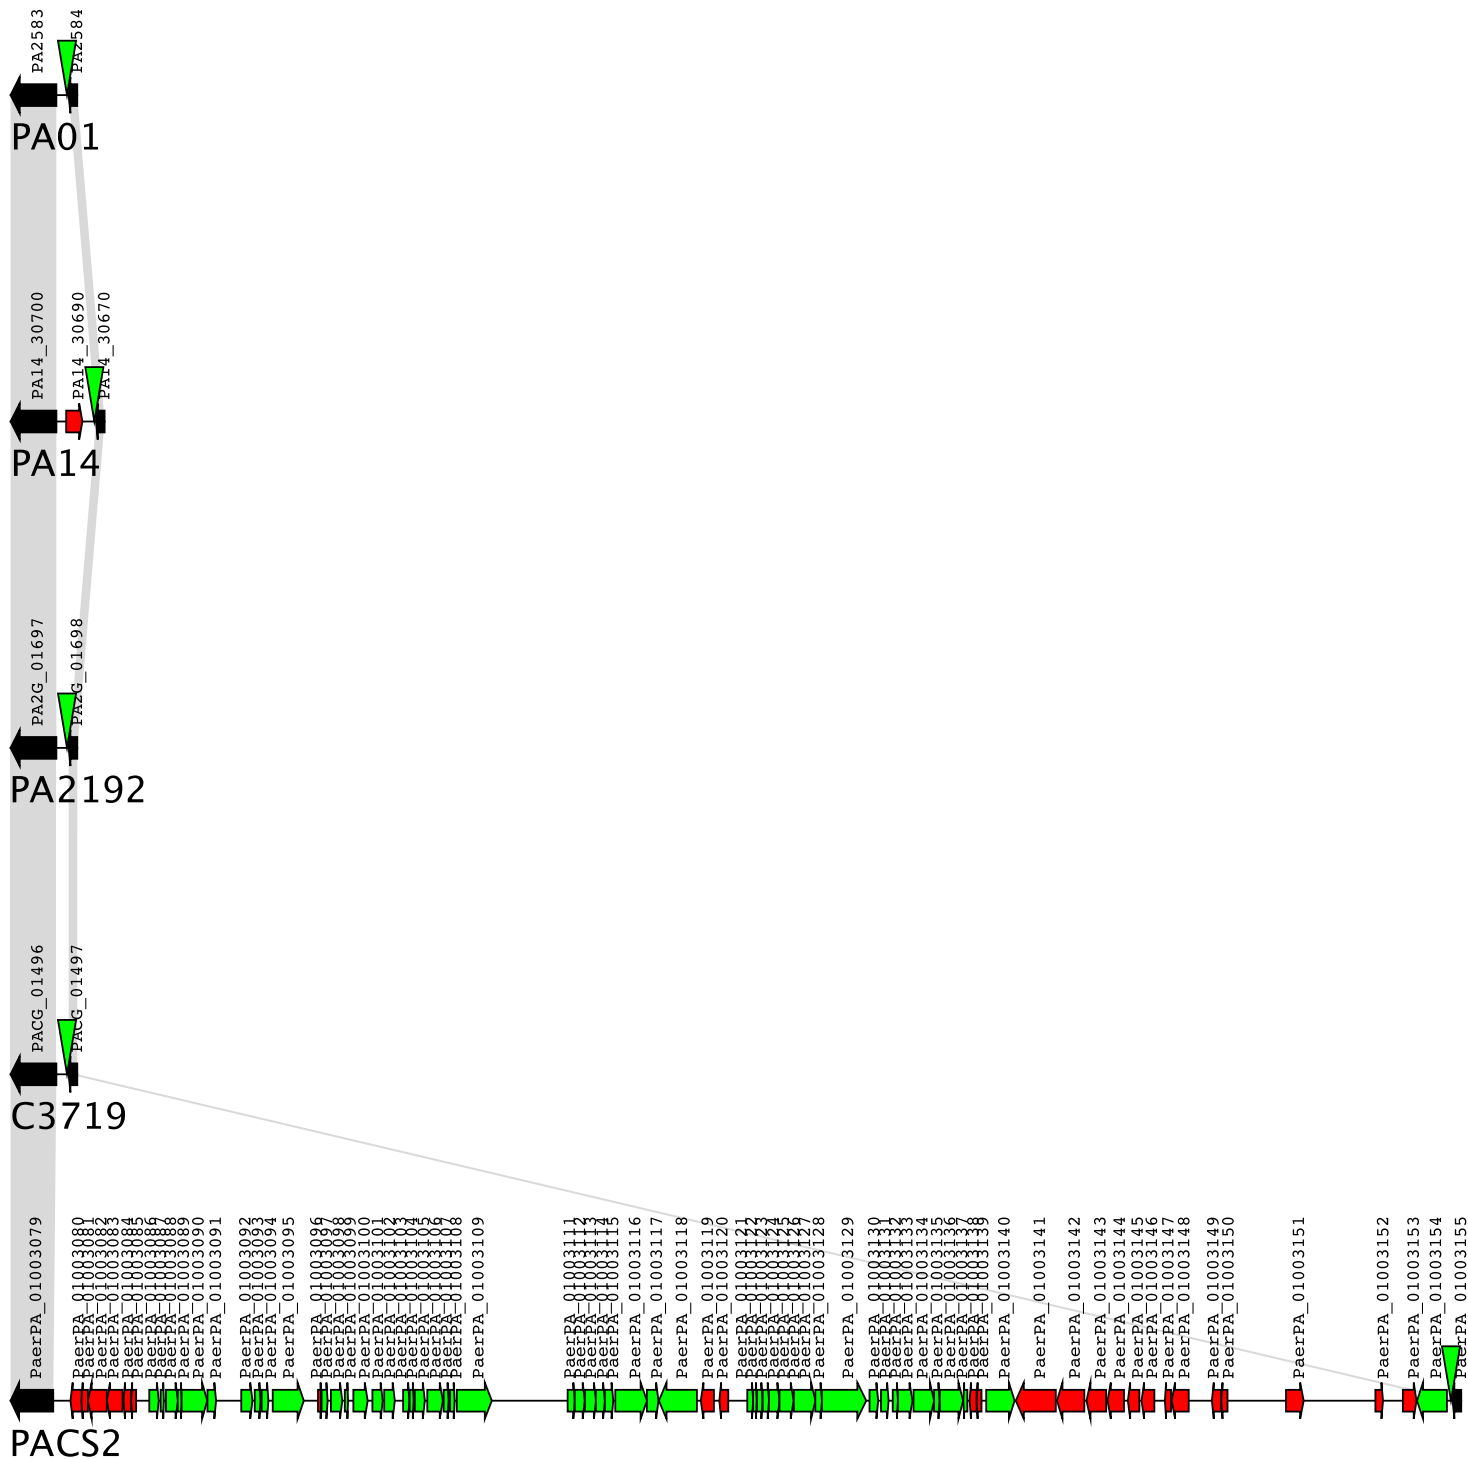



# RGP28

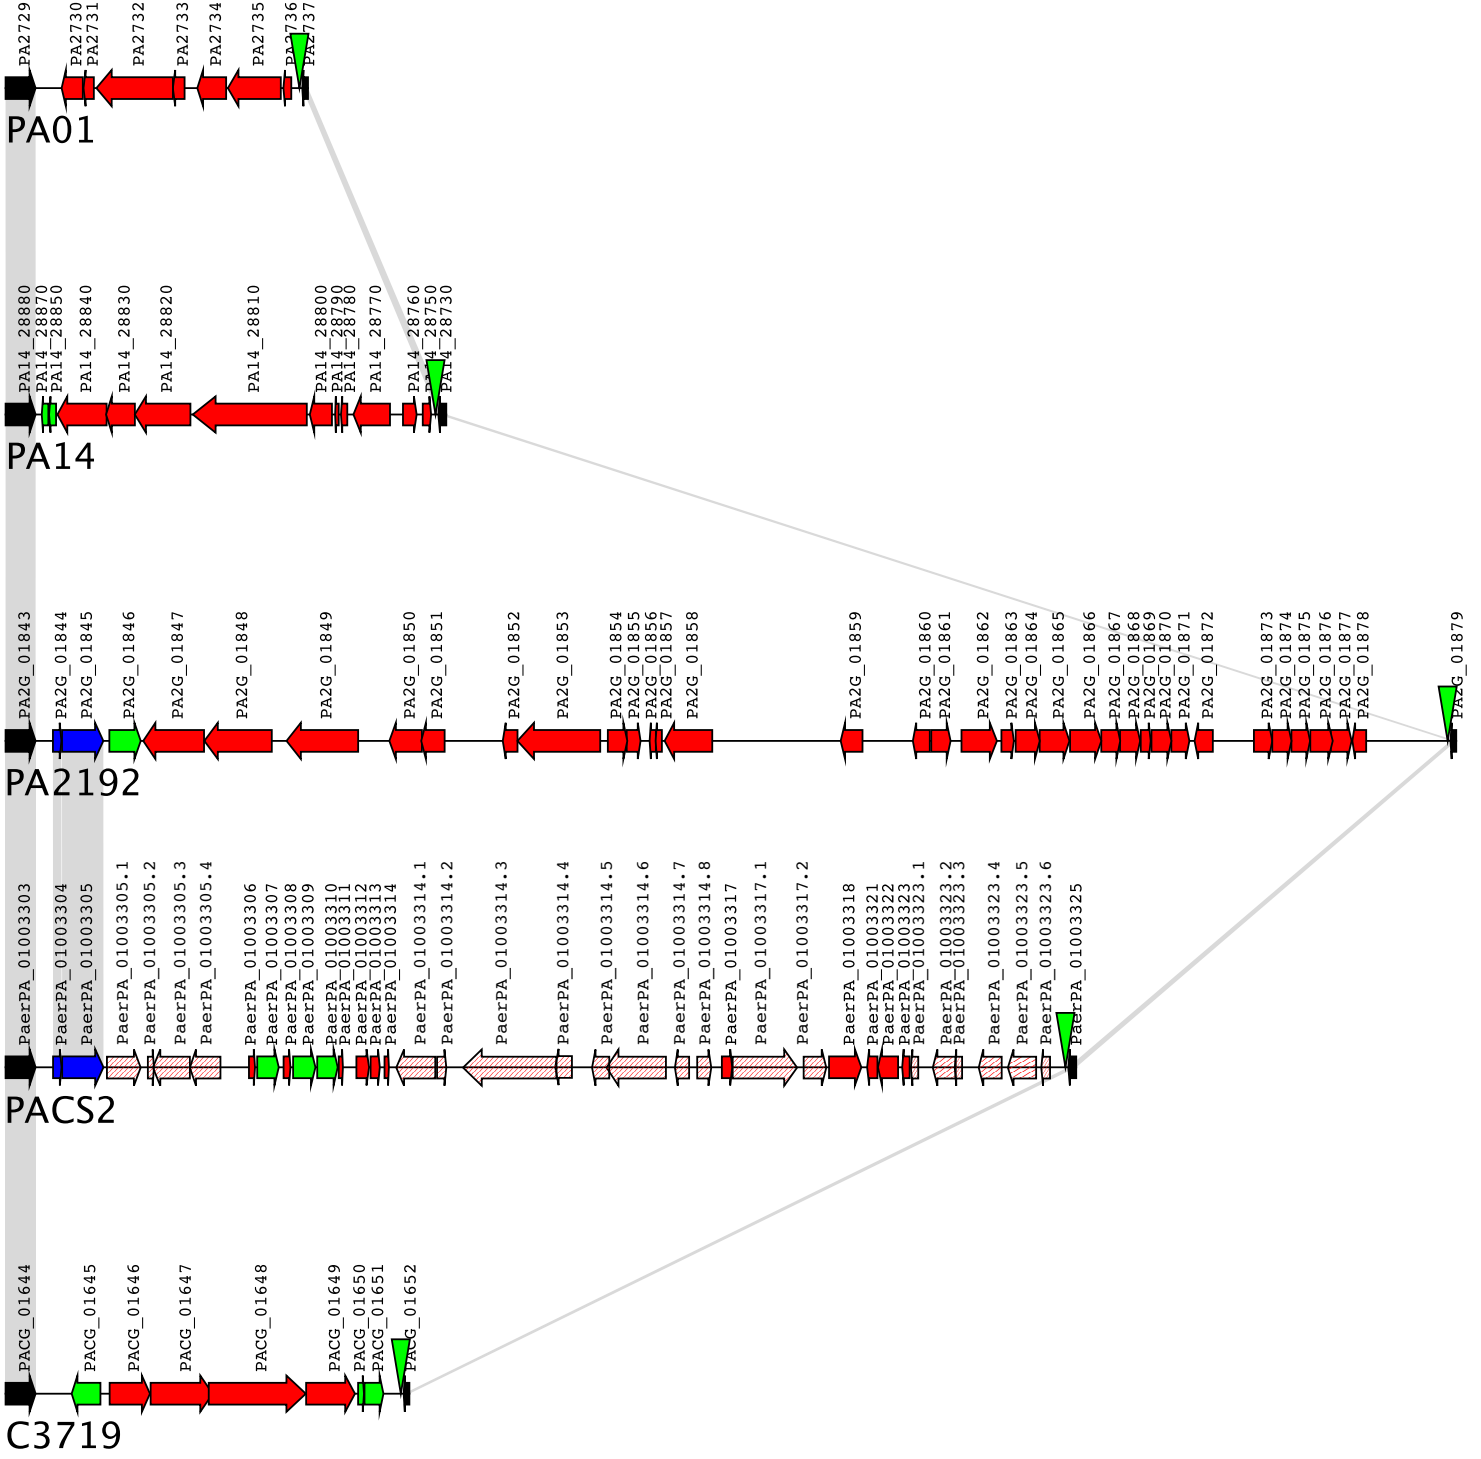

# RGP29

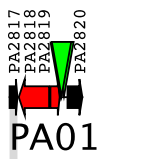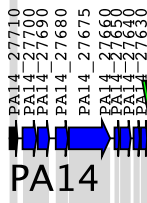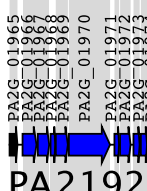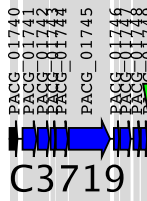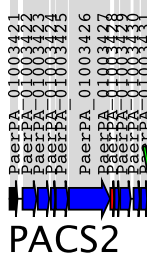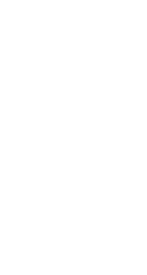

# RGP30

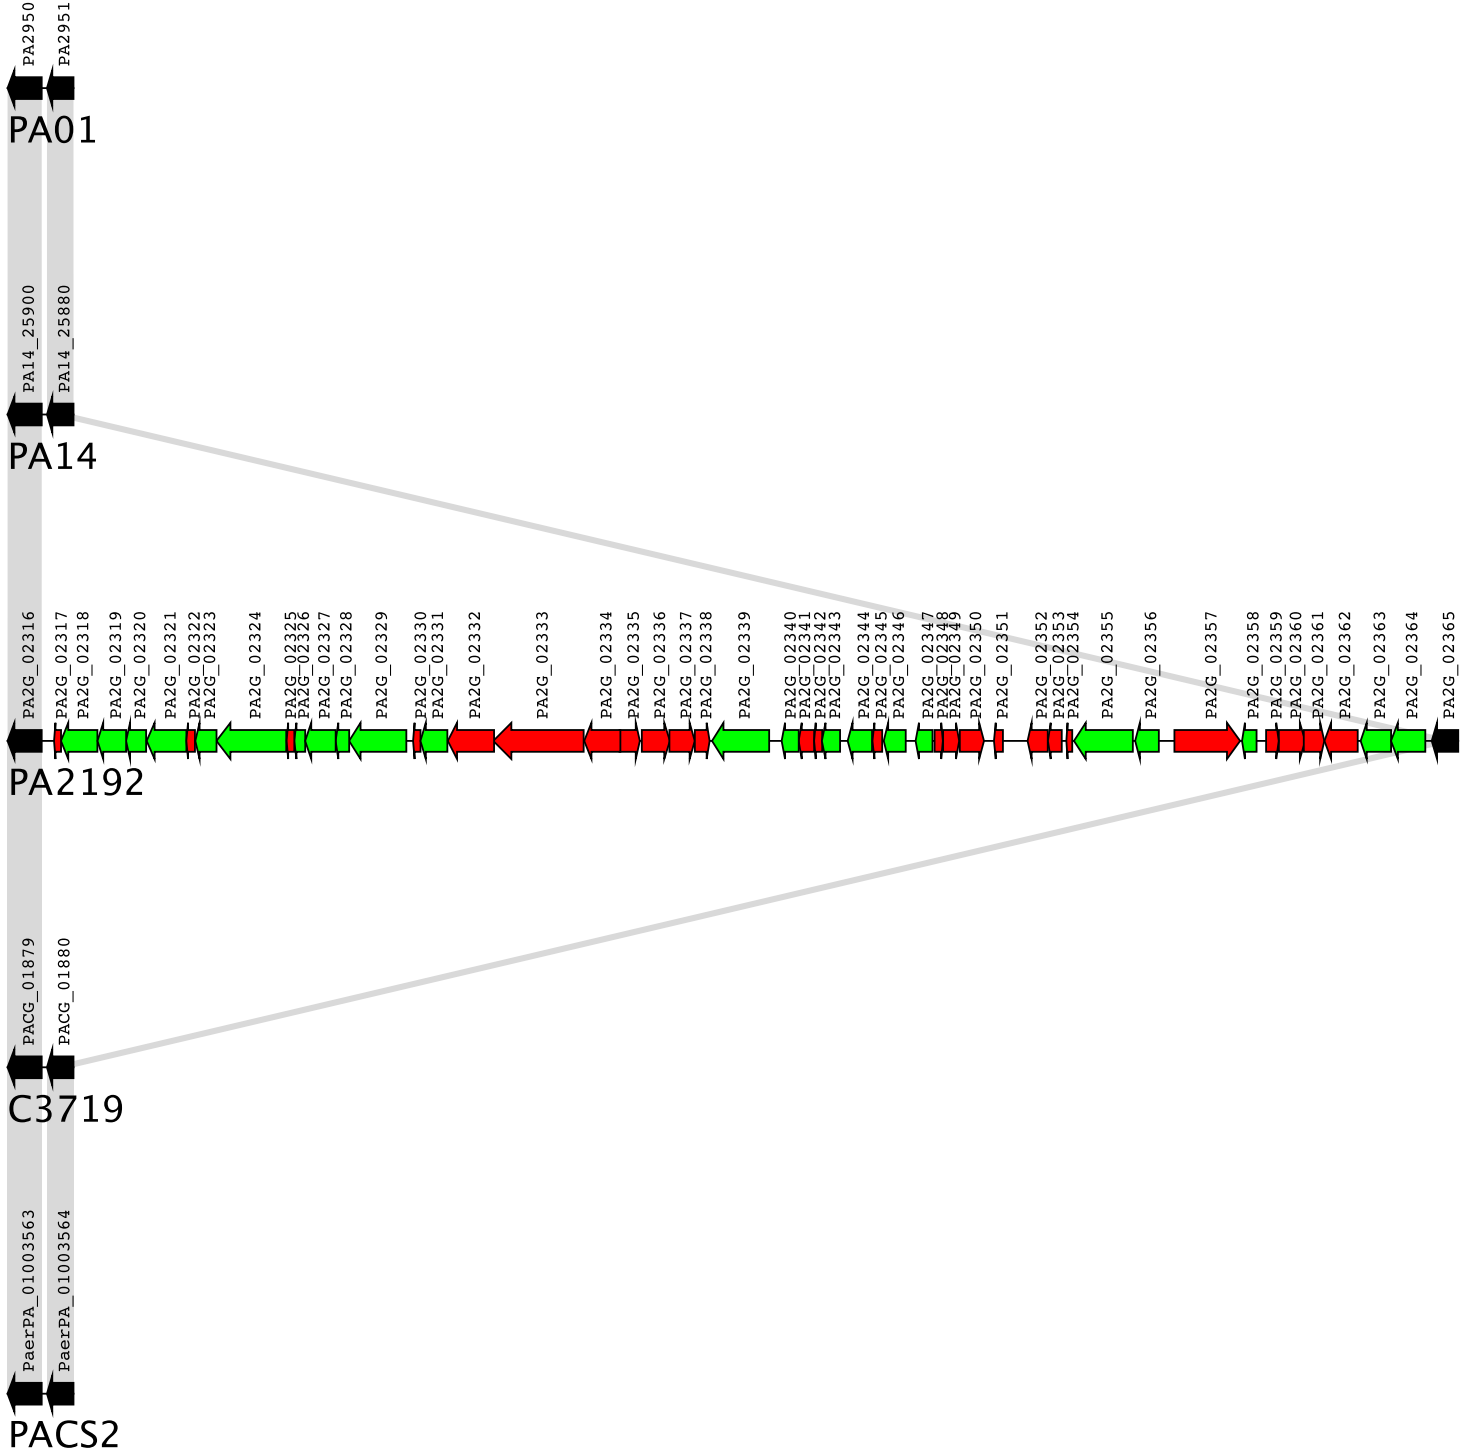

# RGP31

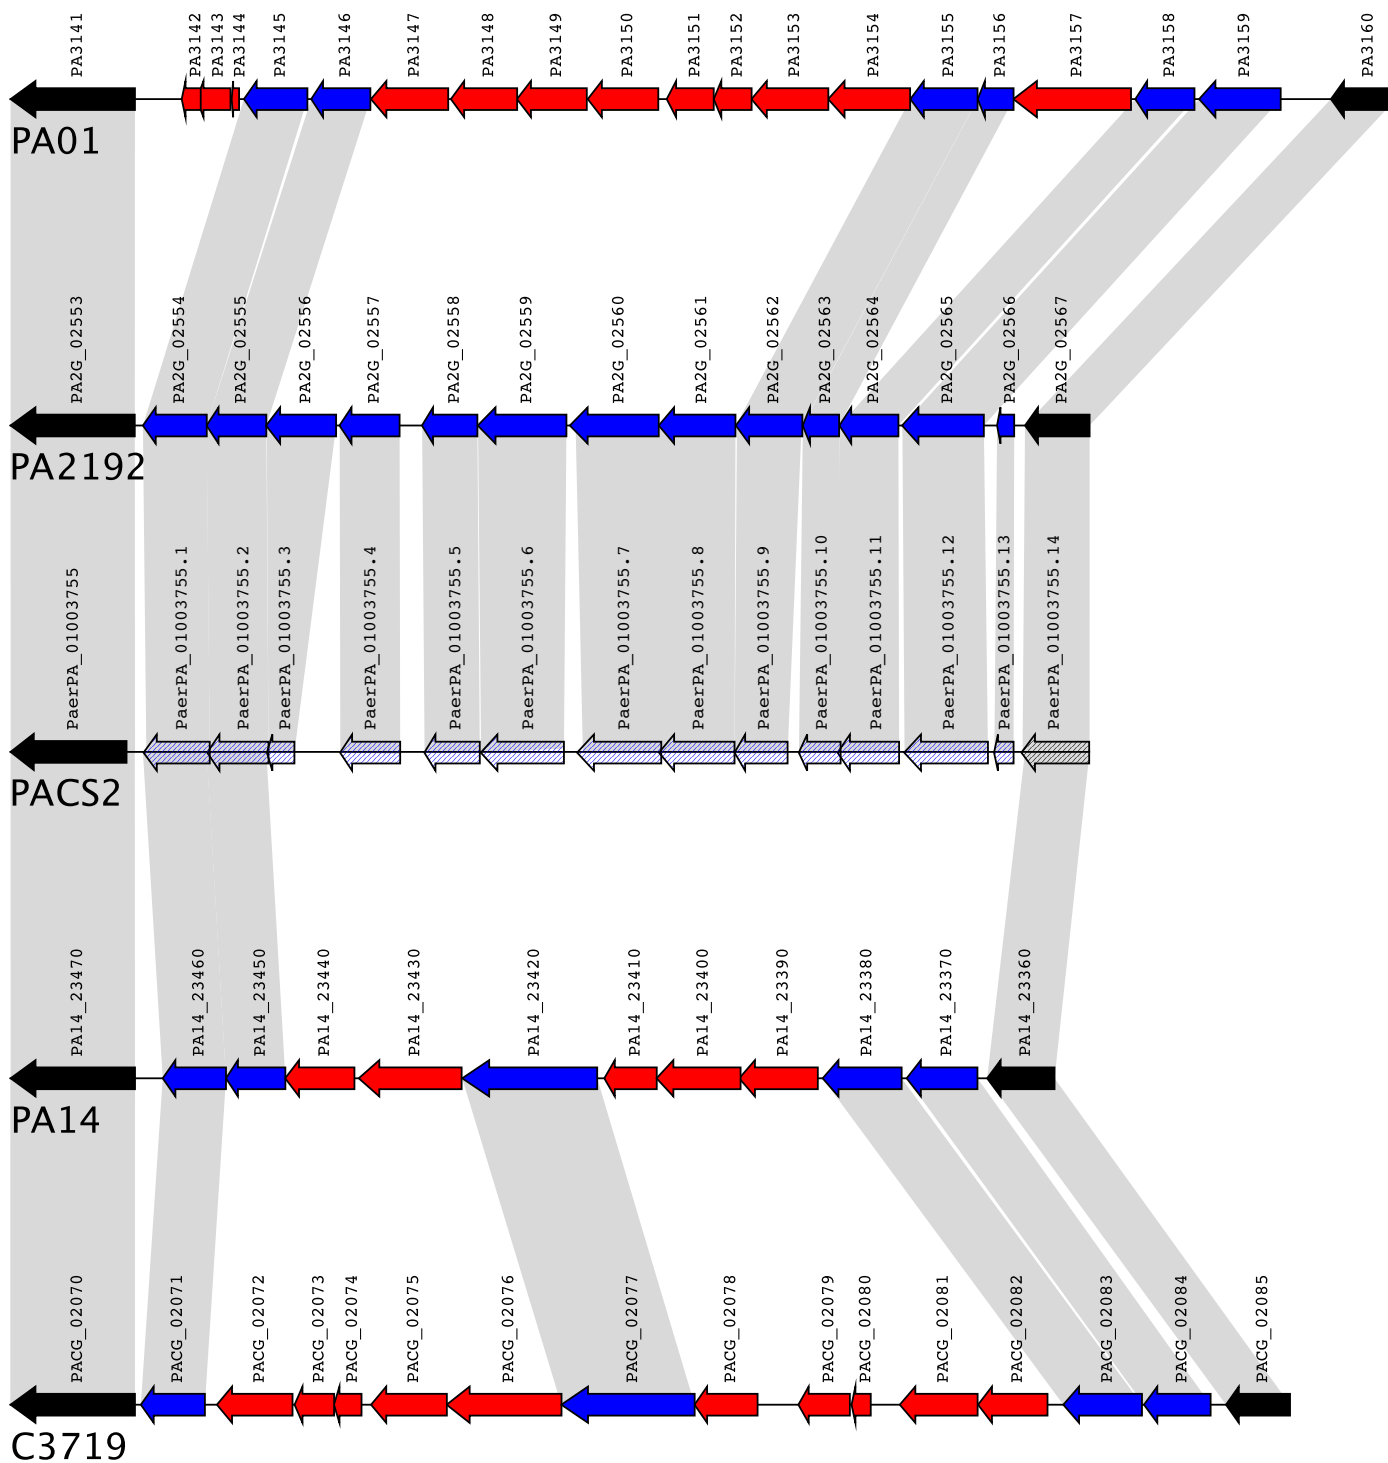

# RGP32

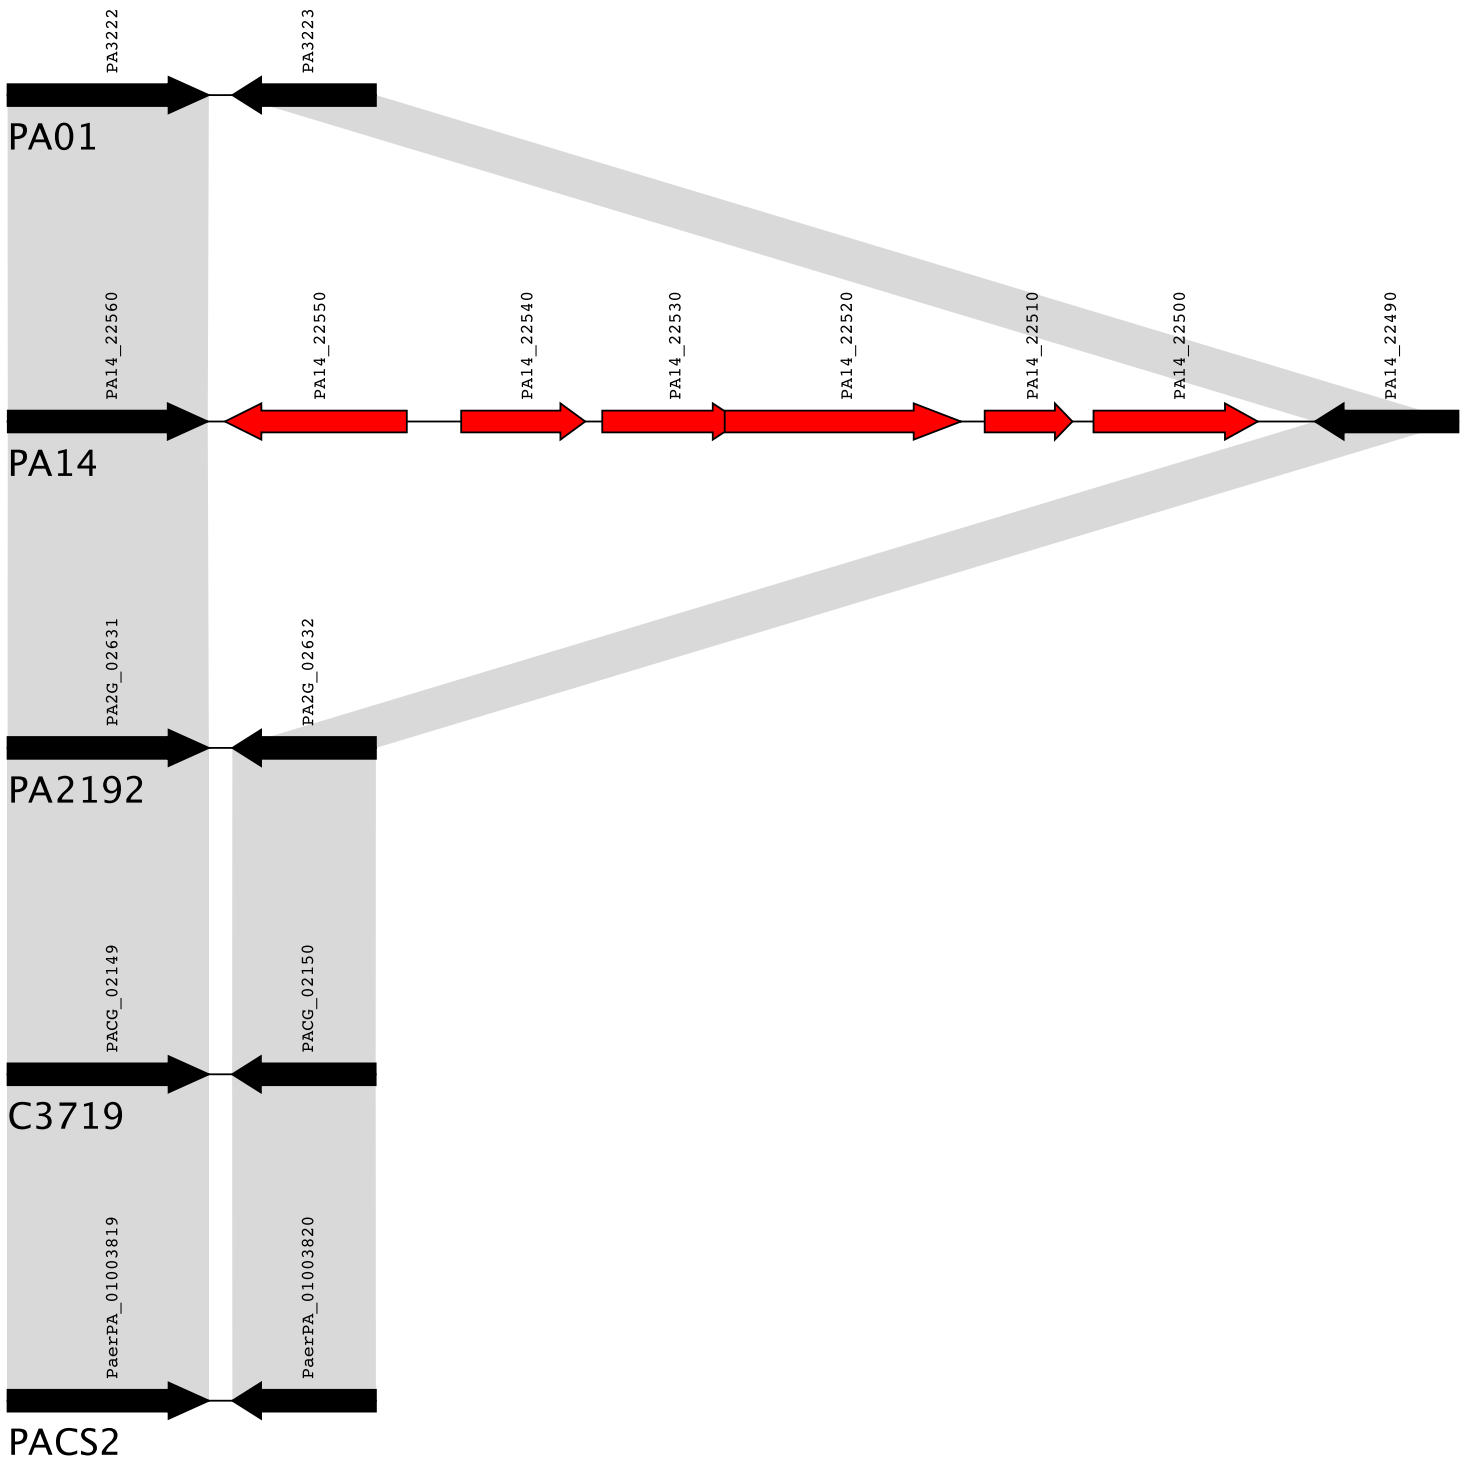

# RGP33

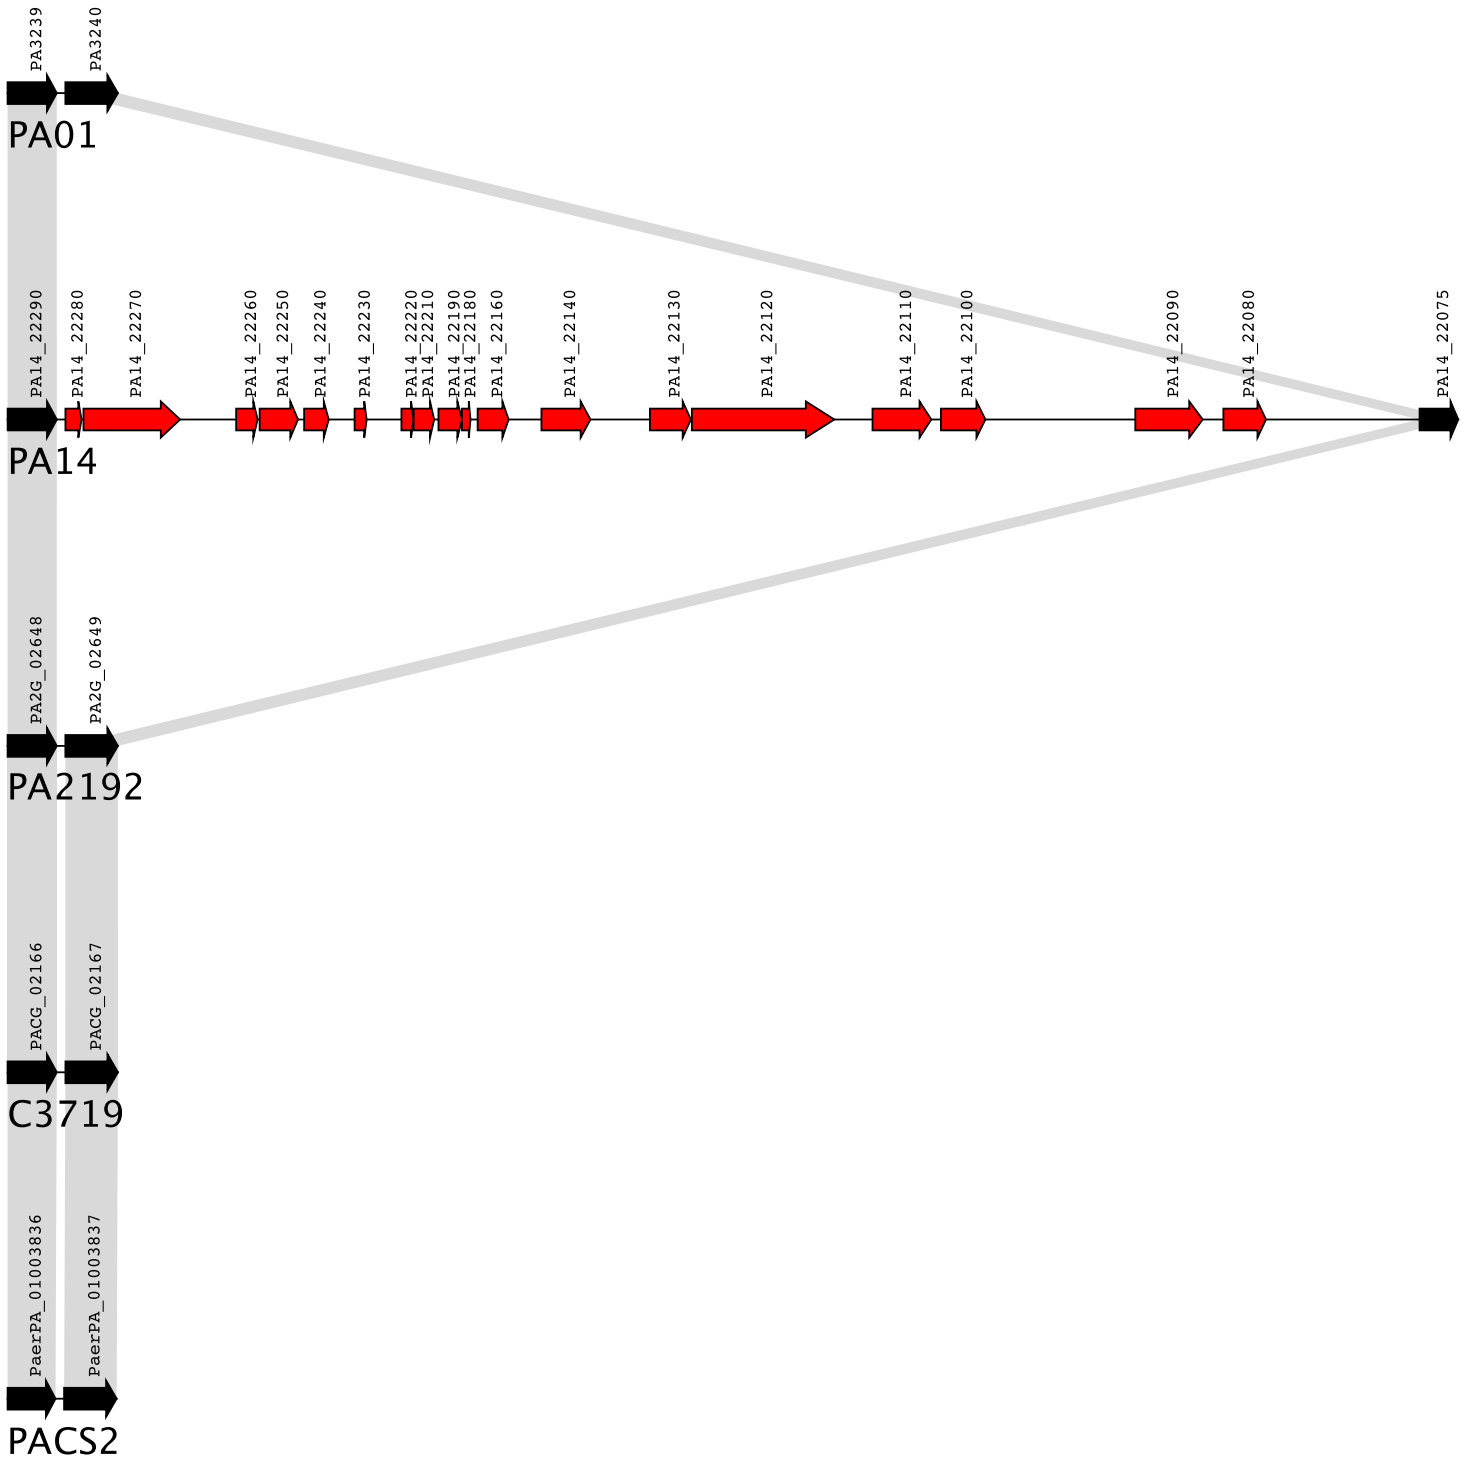

# RGP34

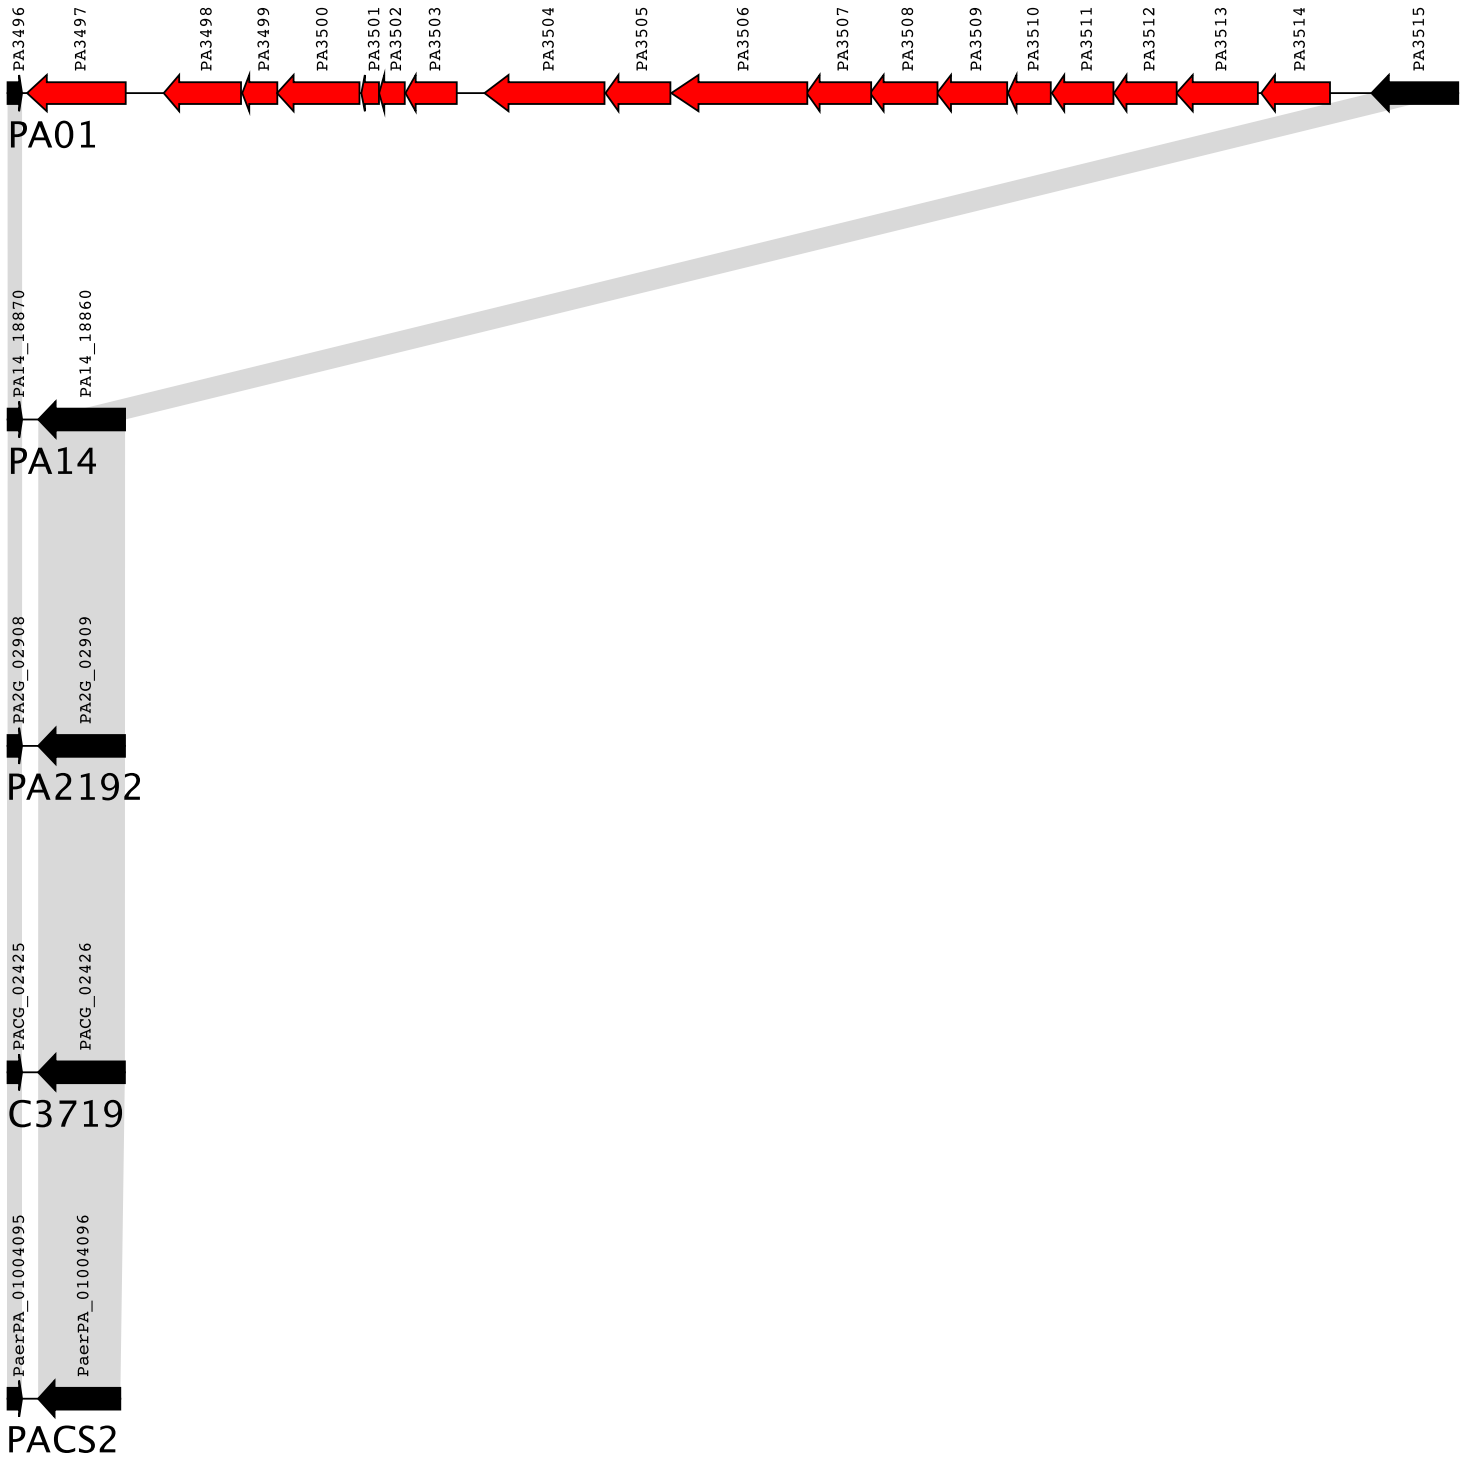

# RGP35

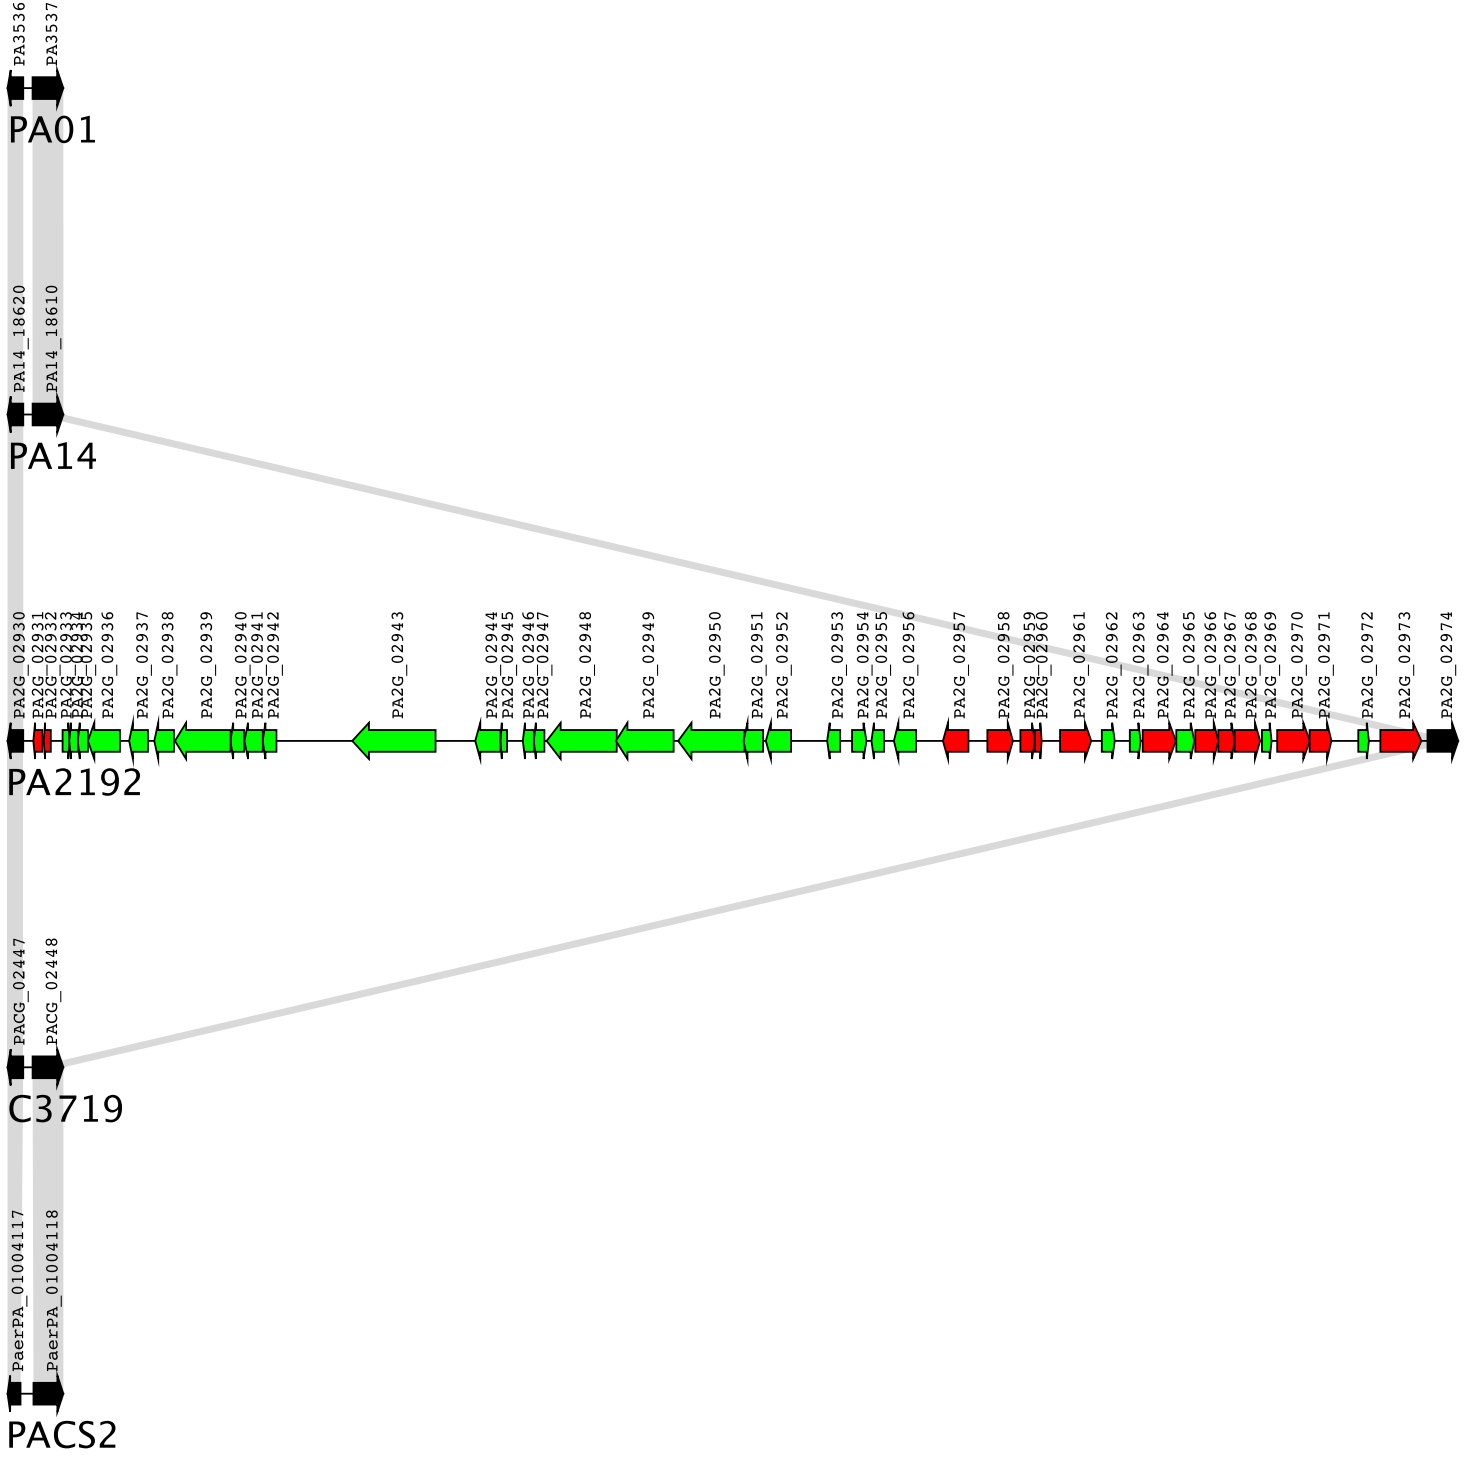



# RGP36

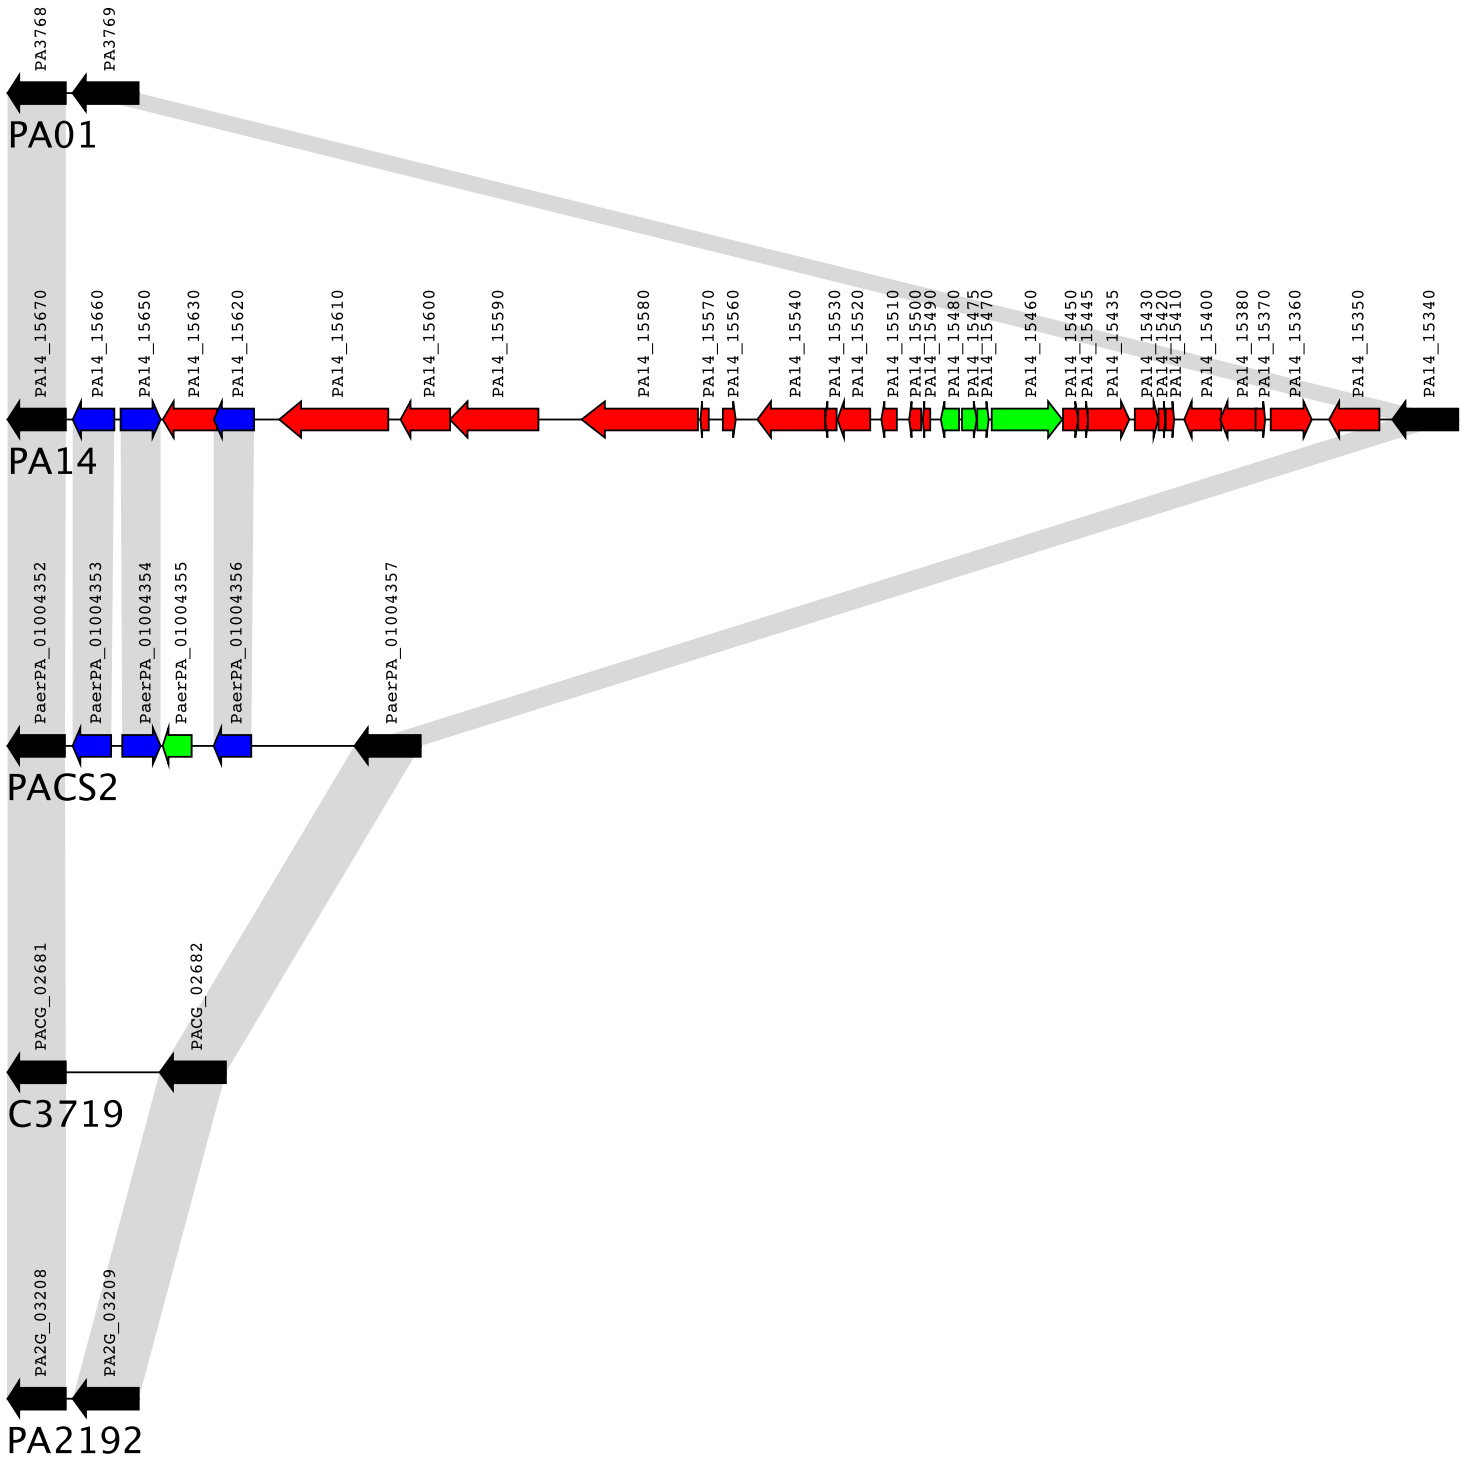

# RGP37

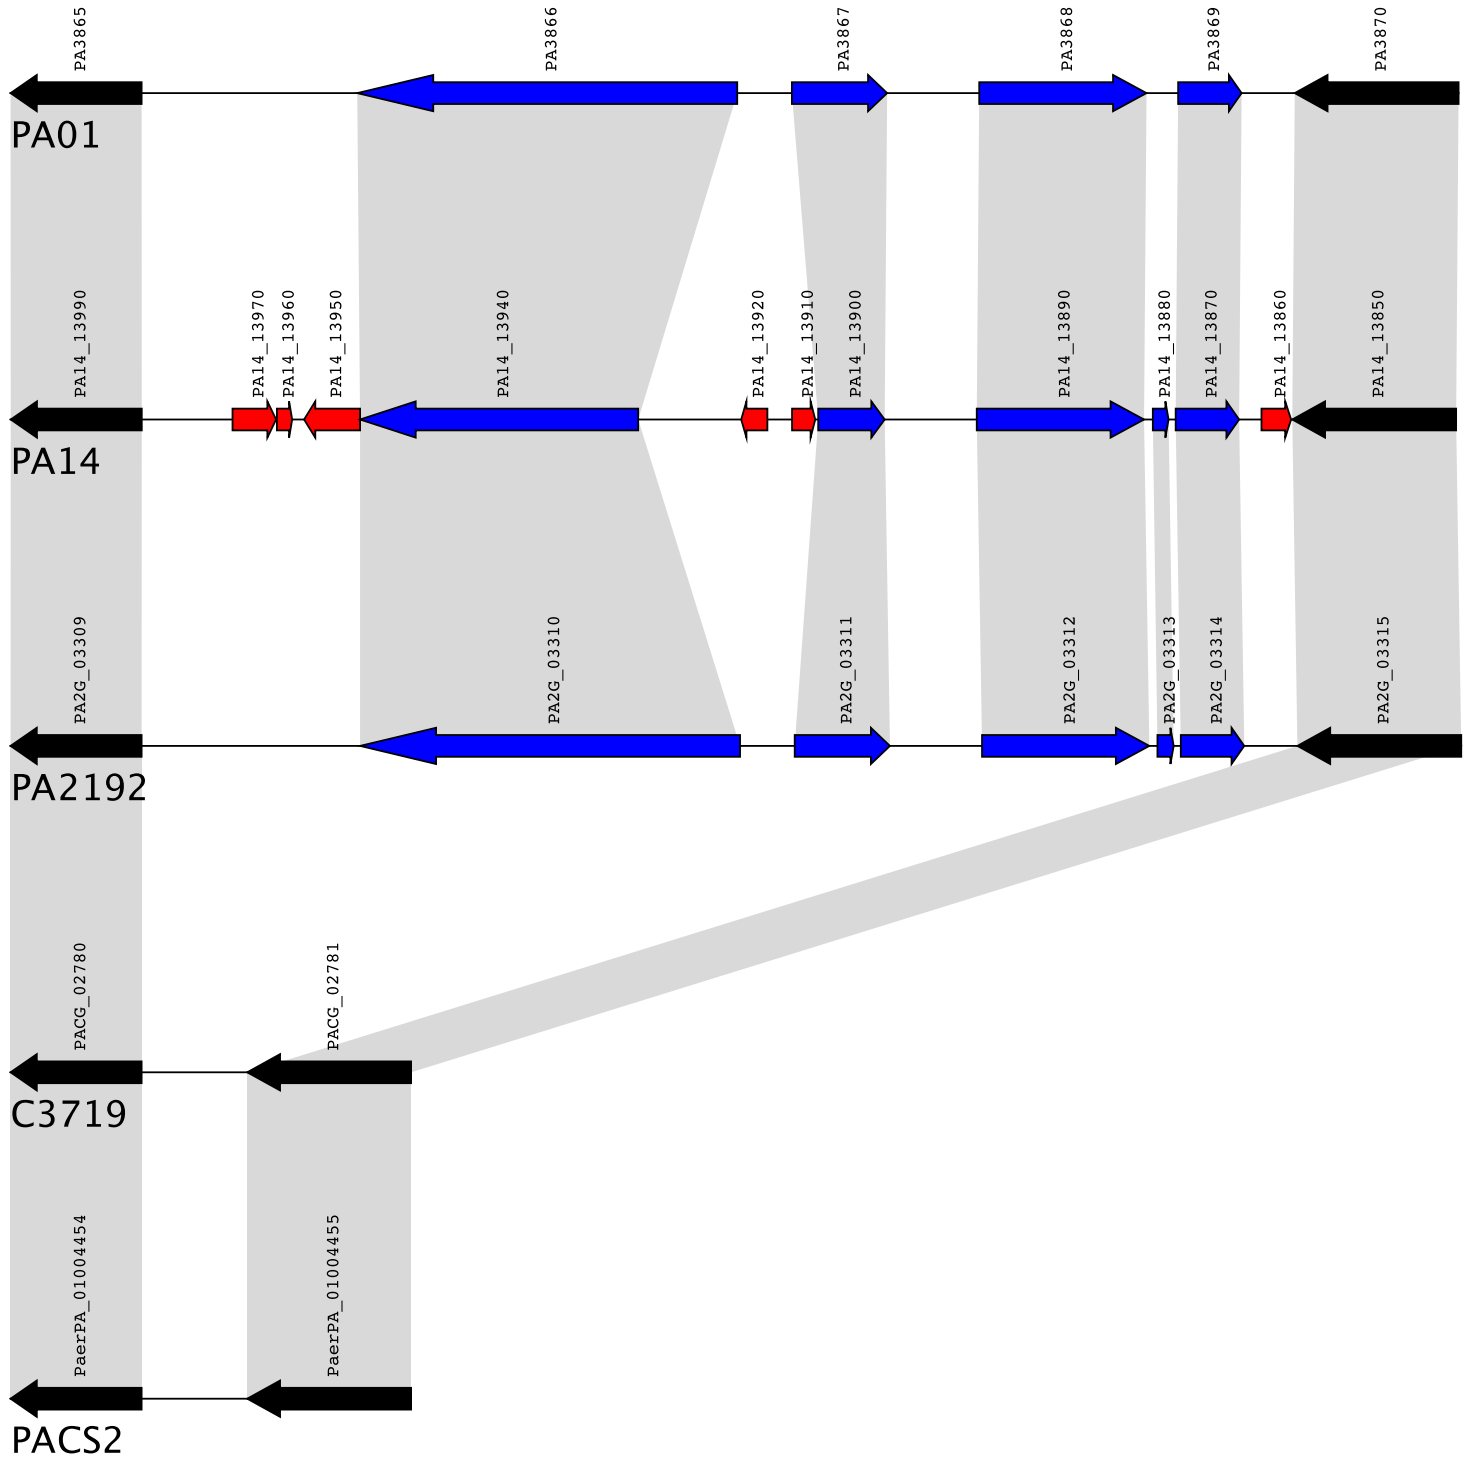

Supplement: pnas_0711982105_5.pdf [file pnas_0711982105_5.pdf]

# RGP38

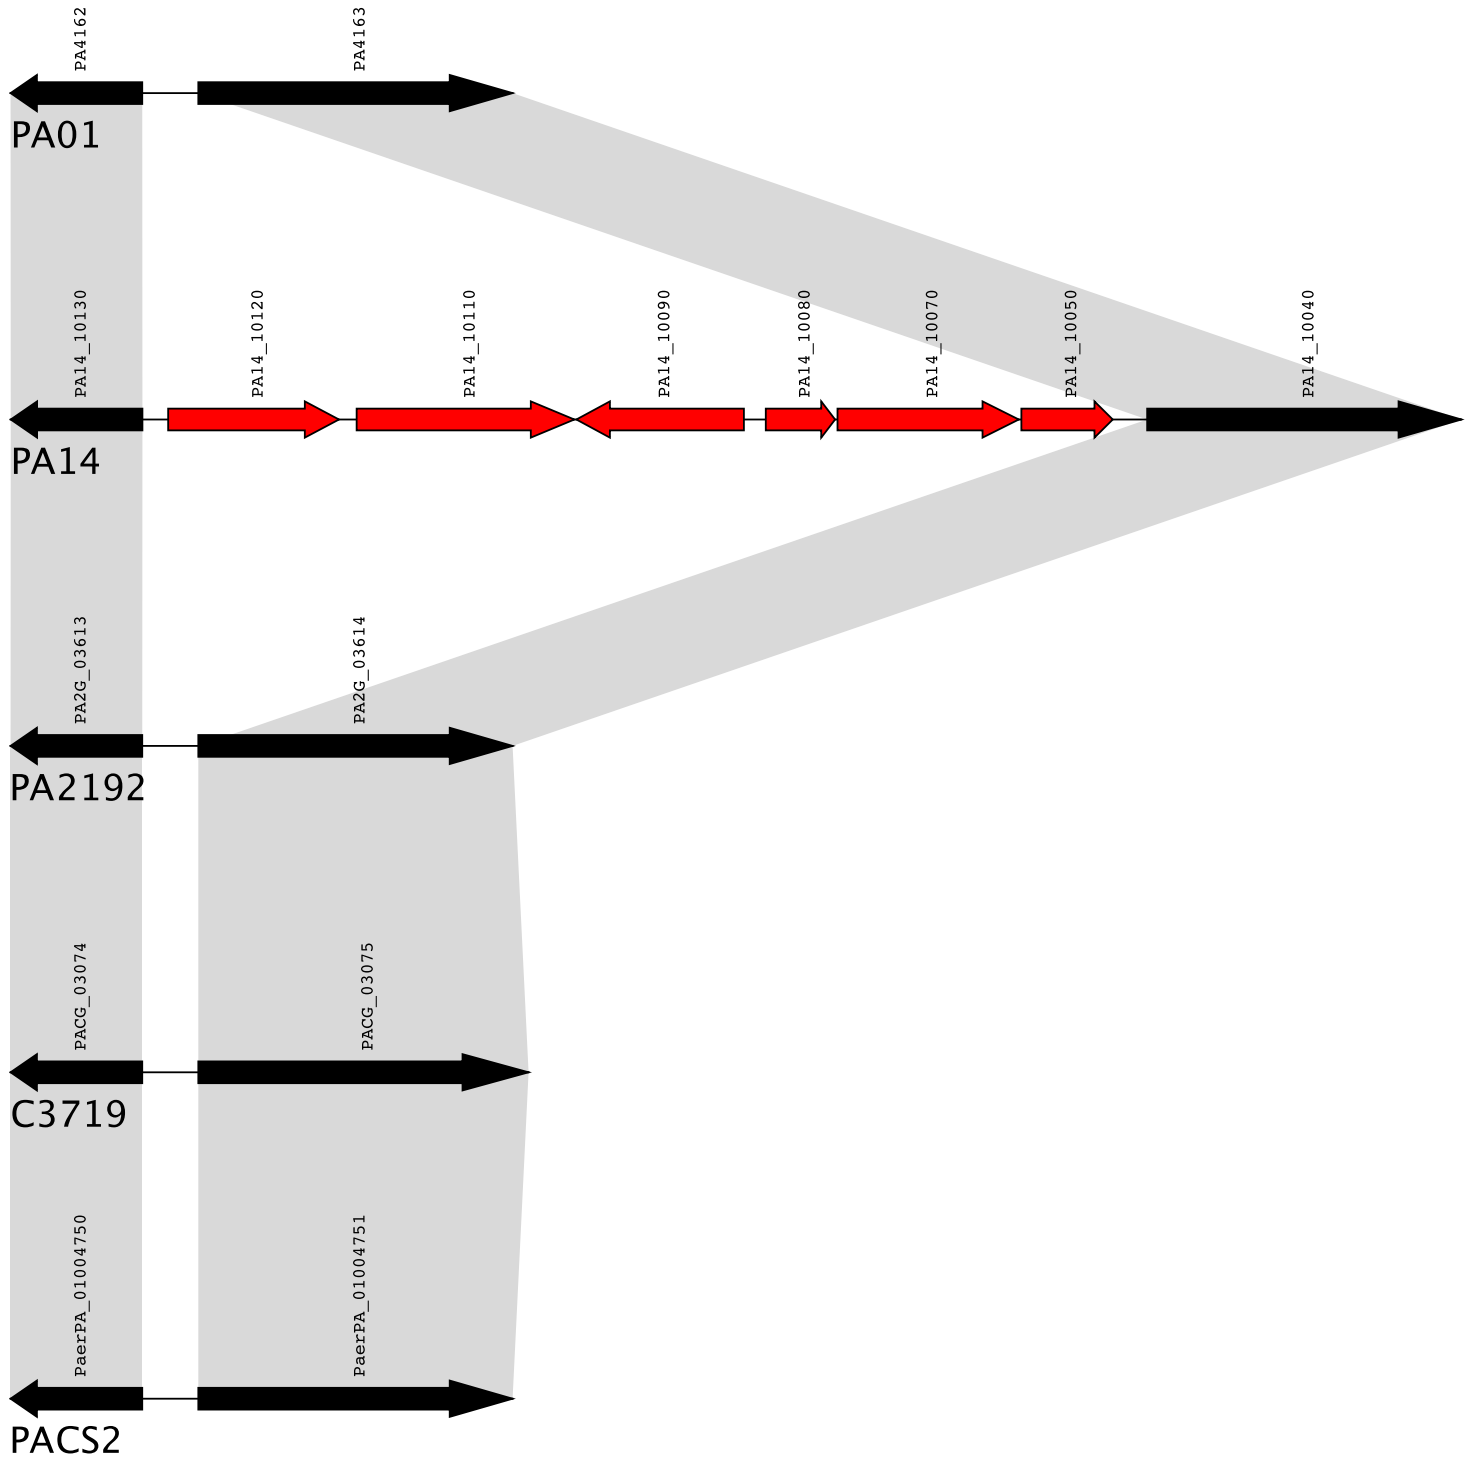

# RGP39

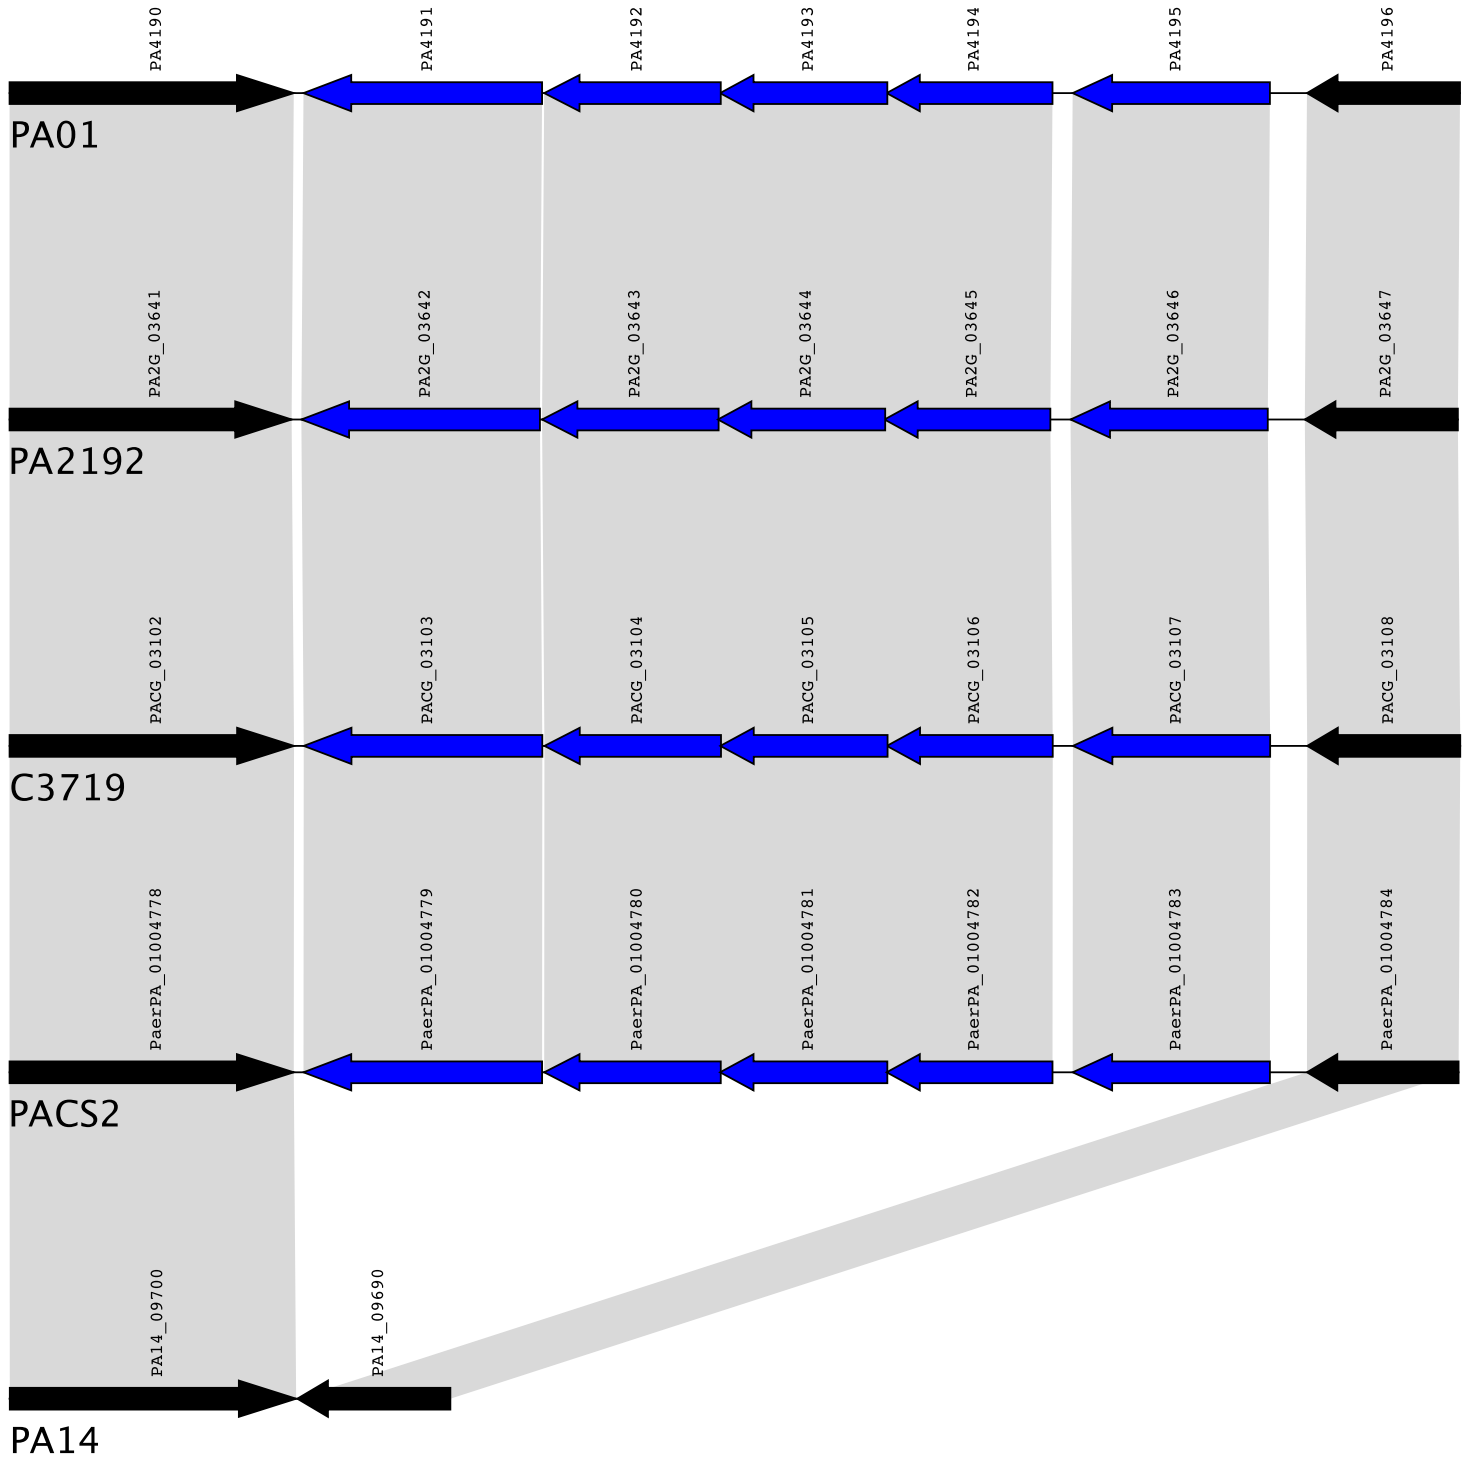



# RGP42

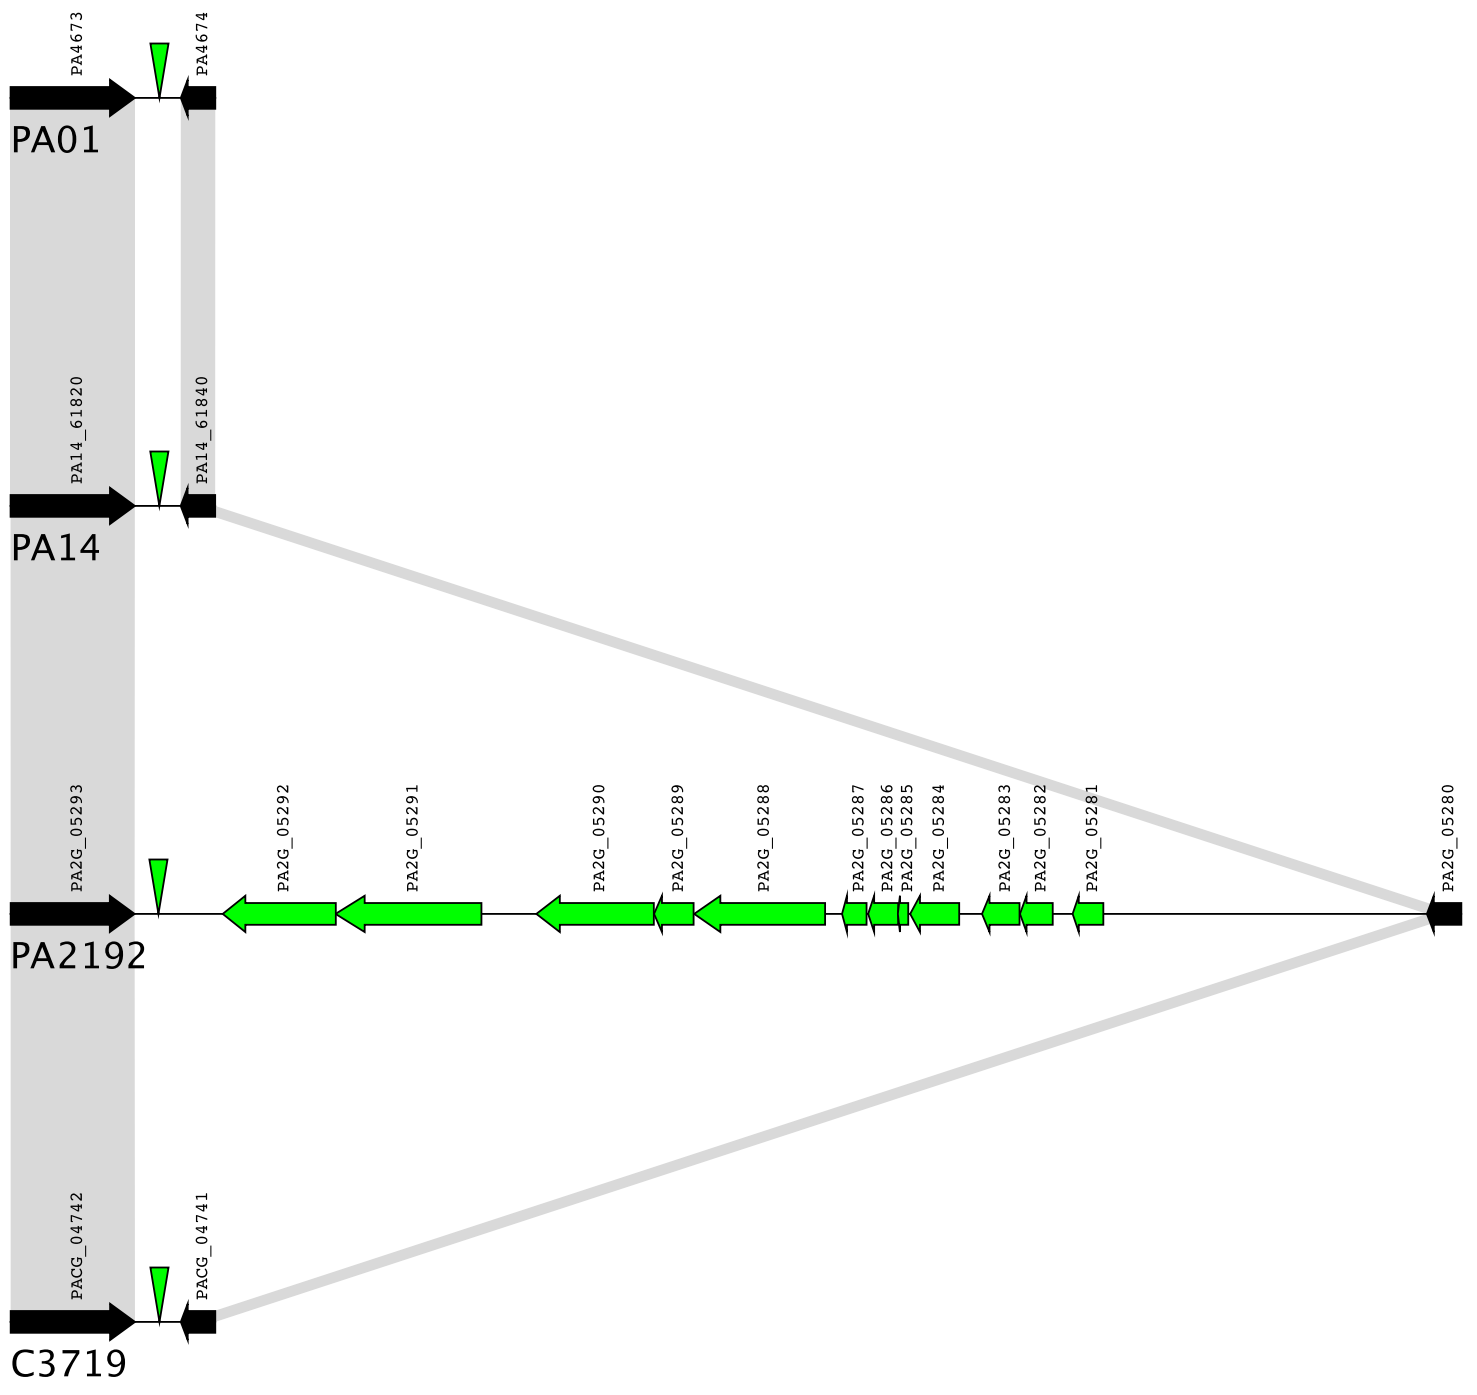

# RGP43

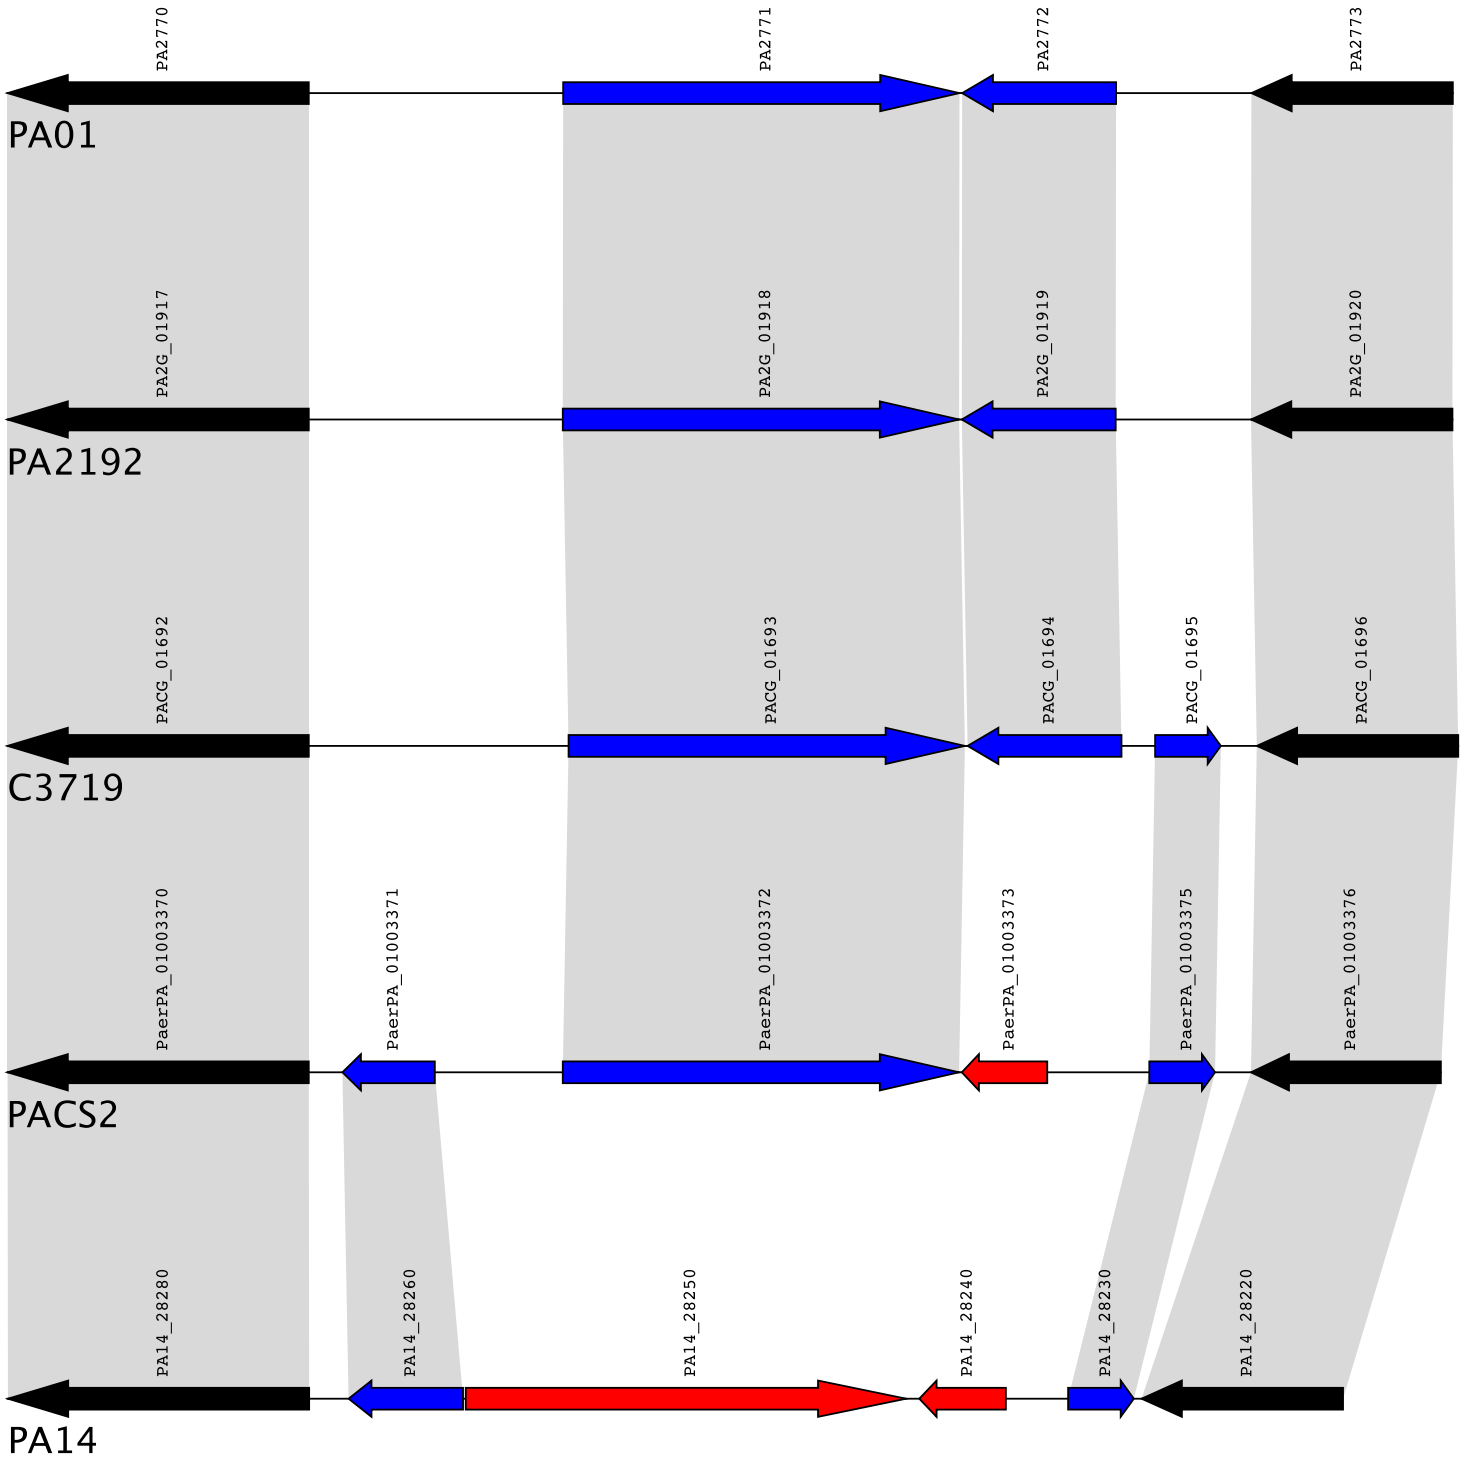

# RGP44

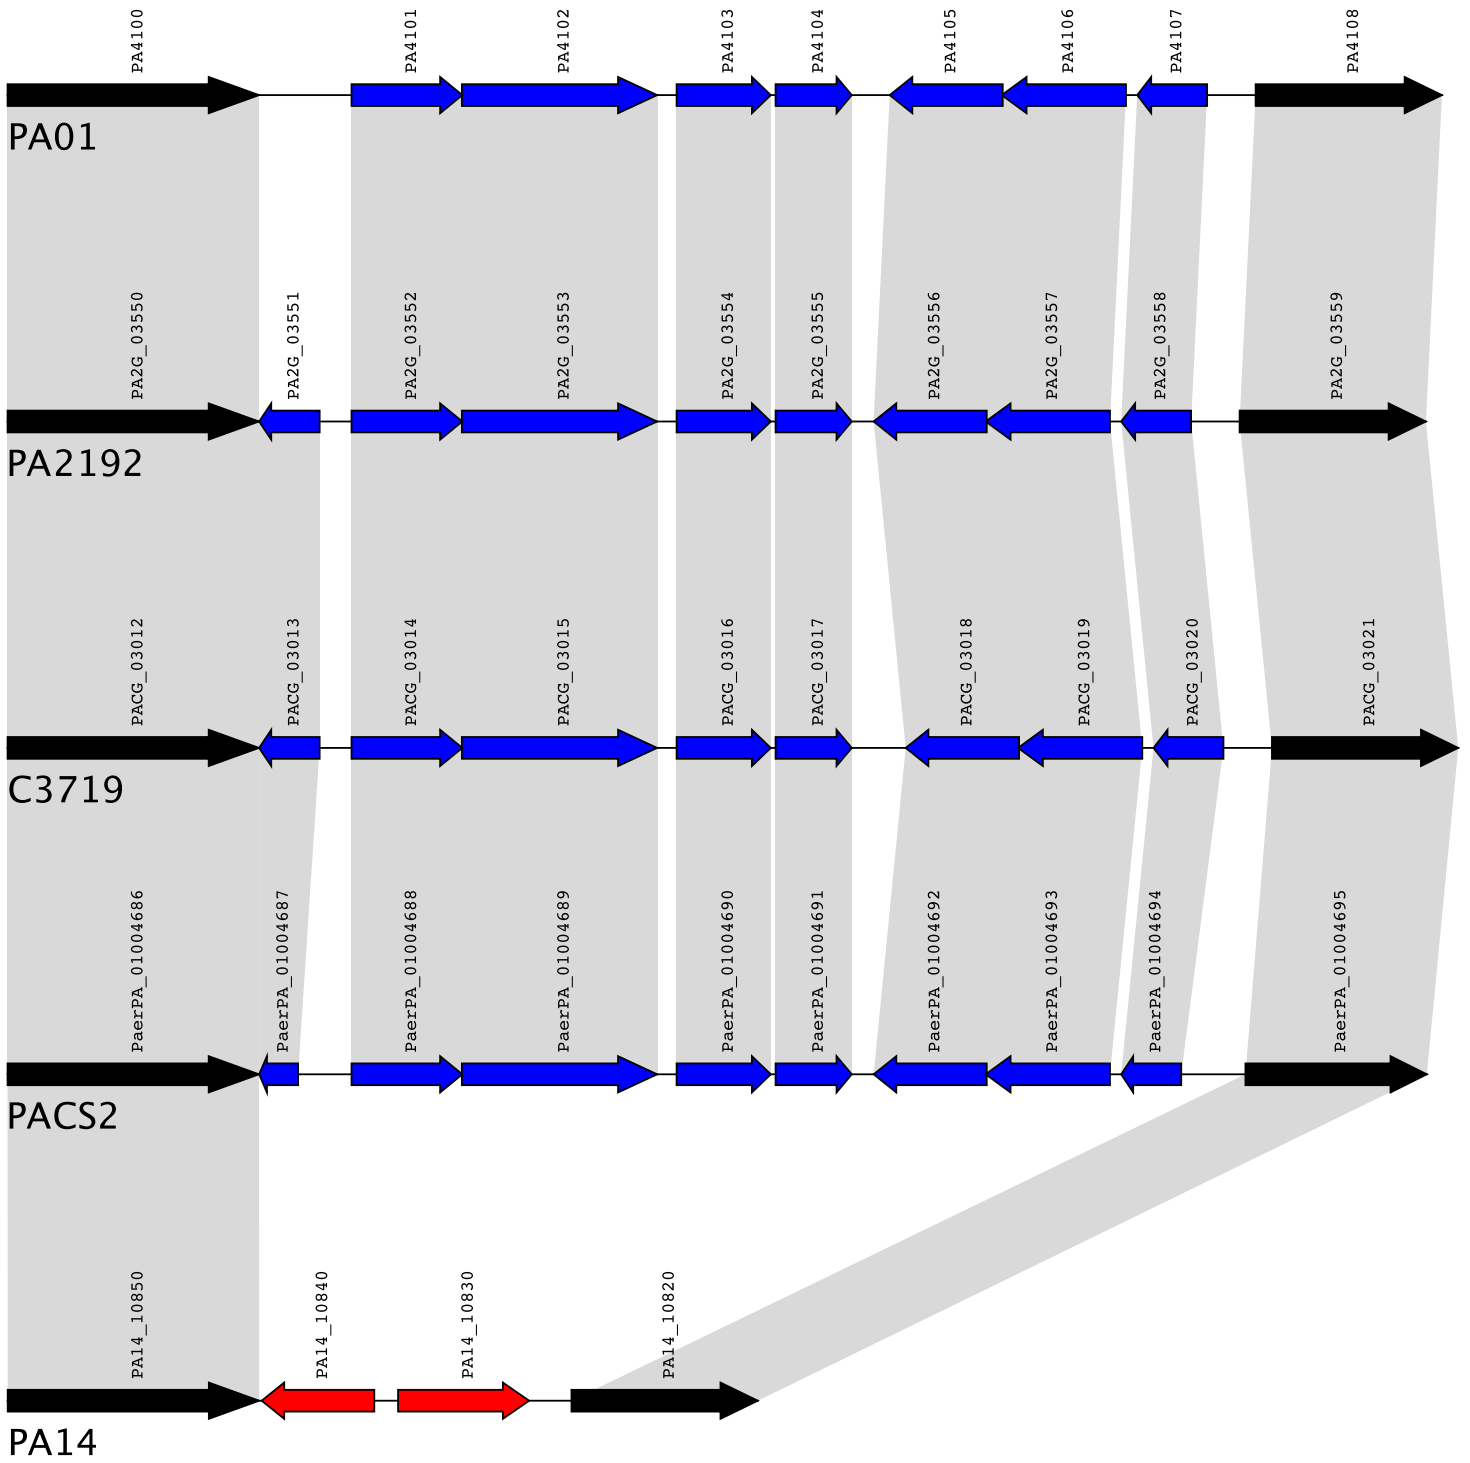

# RGP46

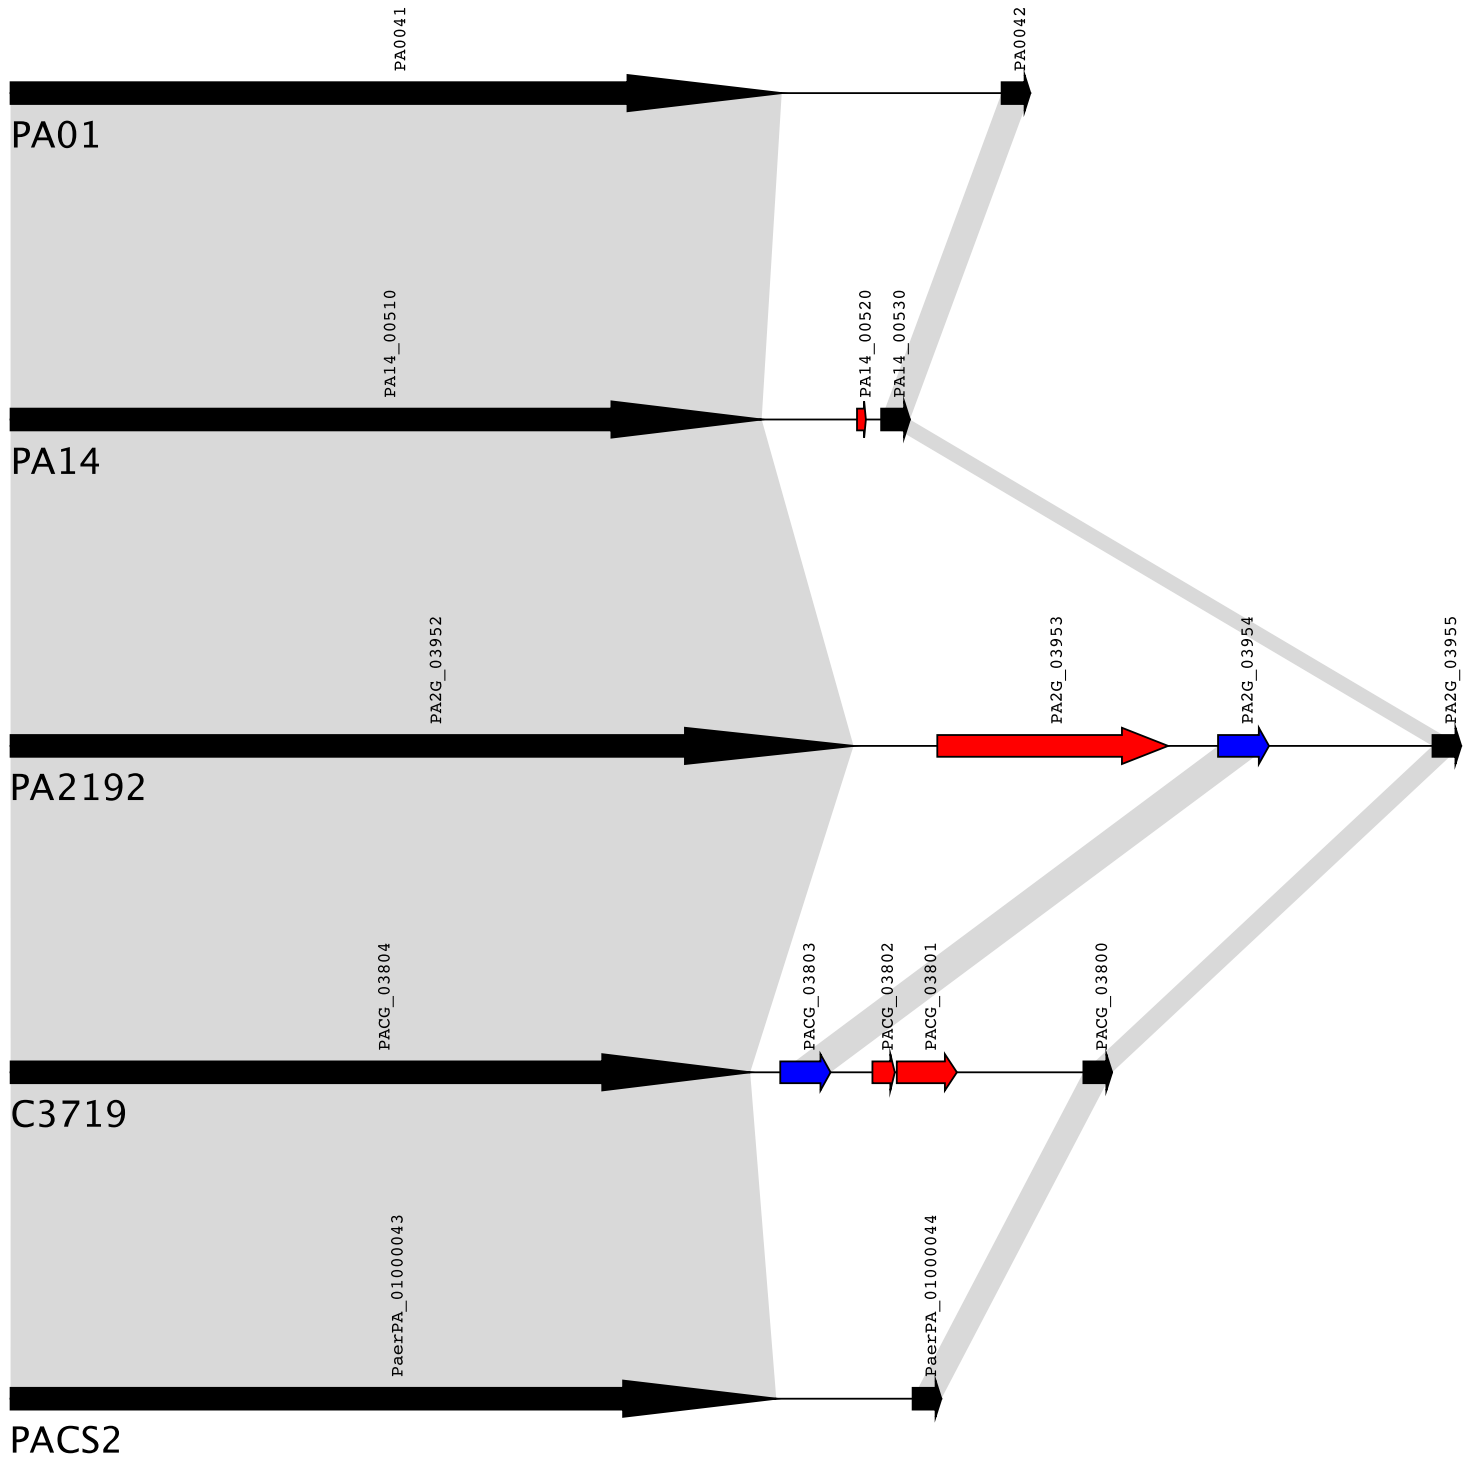

# RGP47

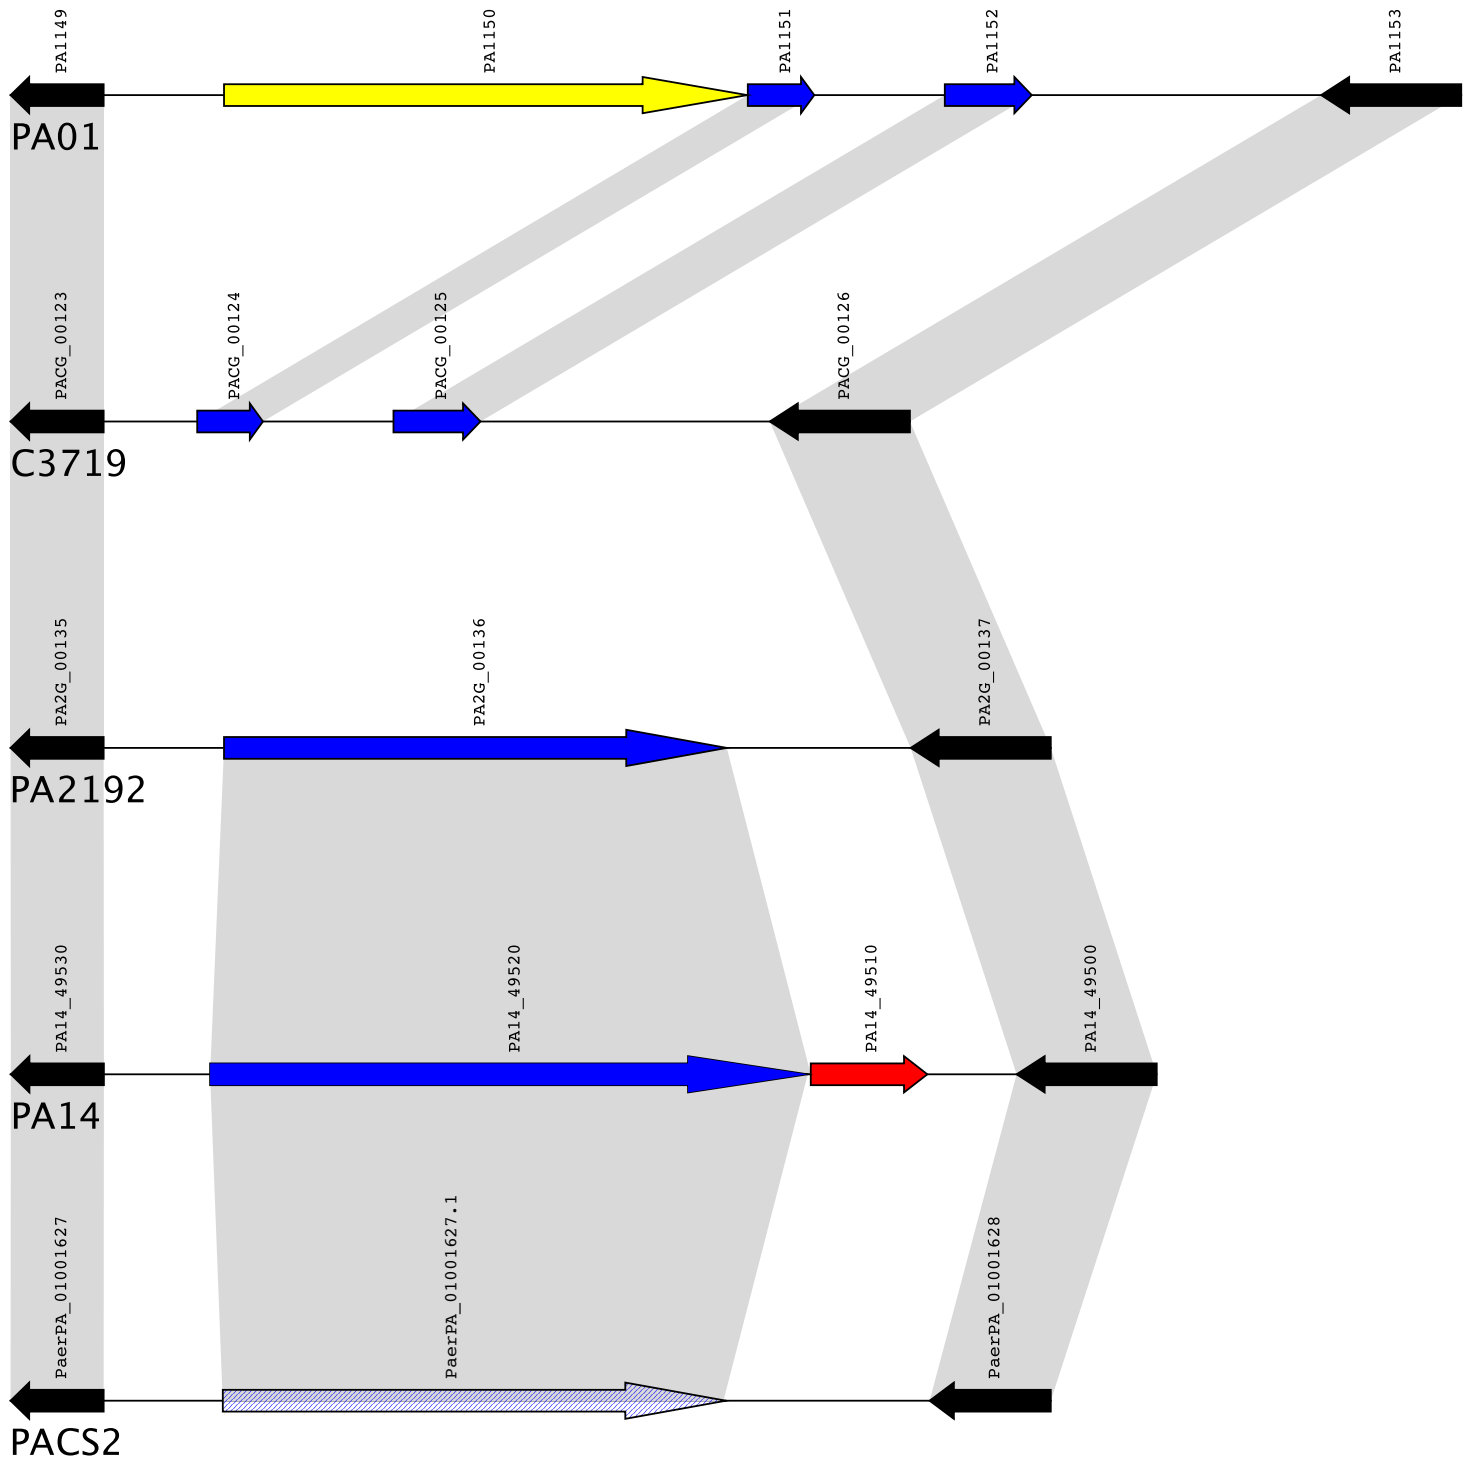



# RGP48

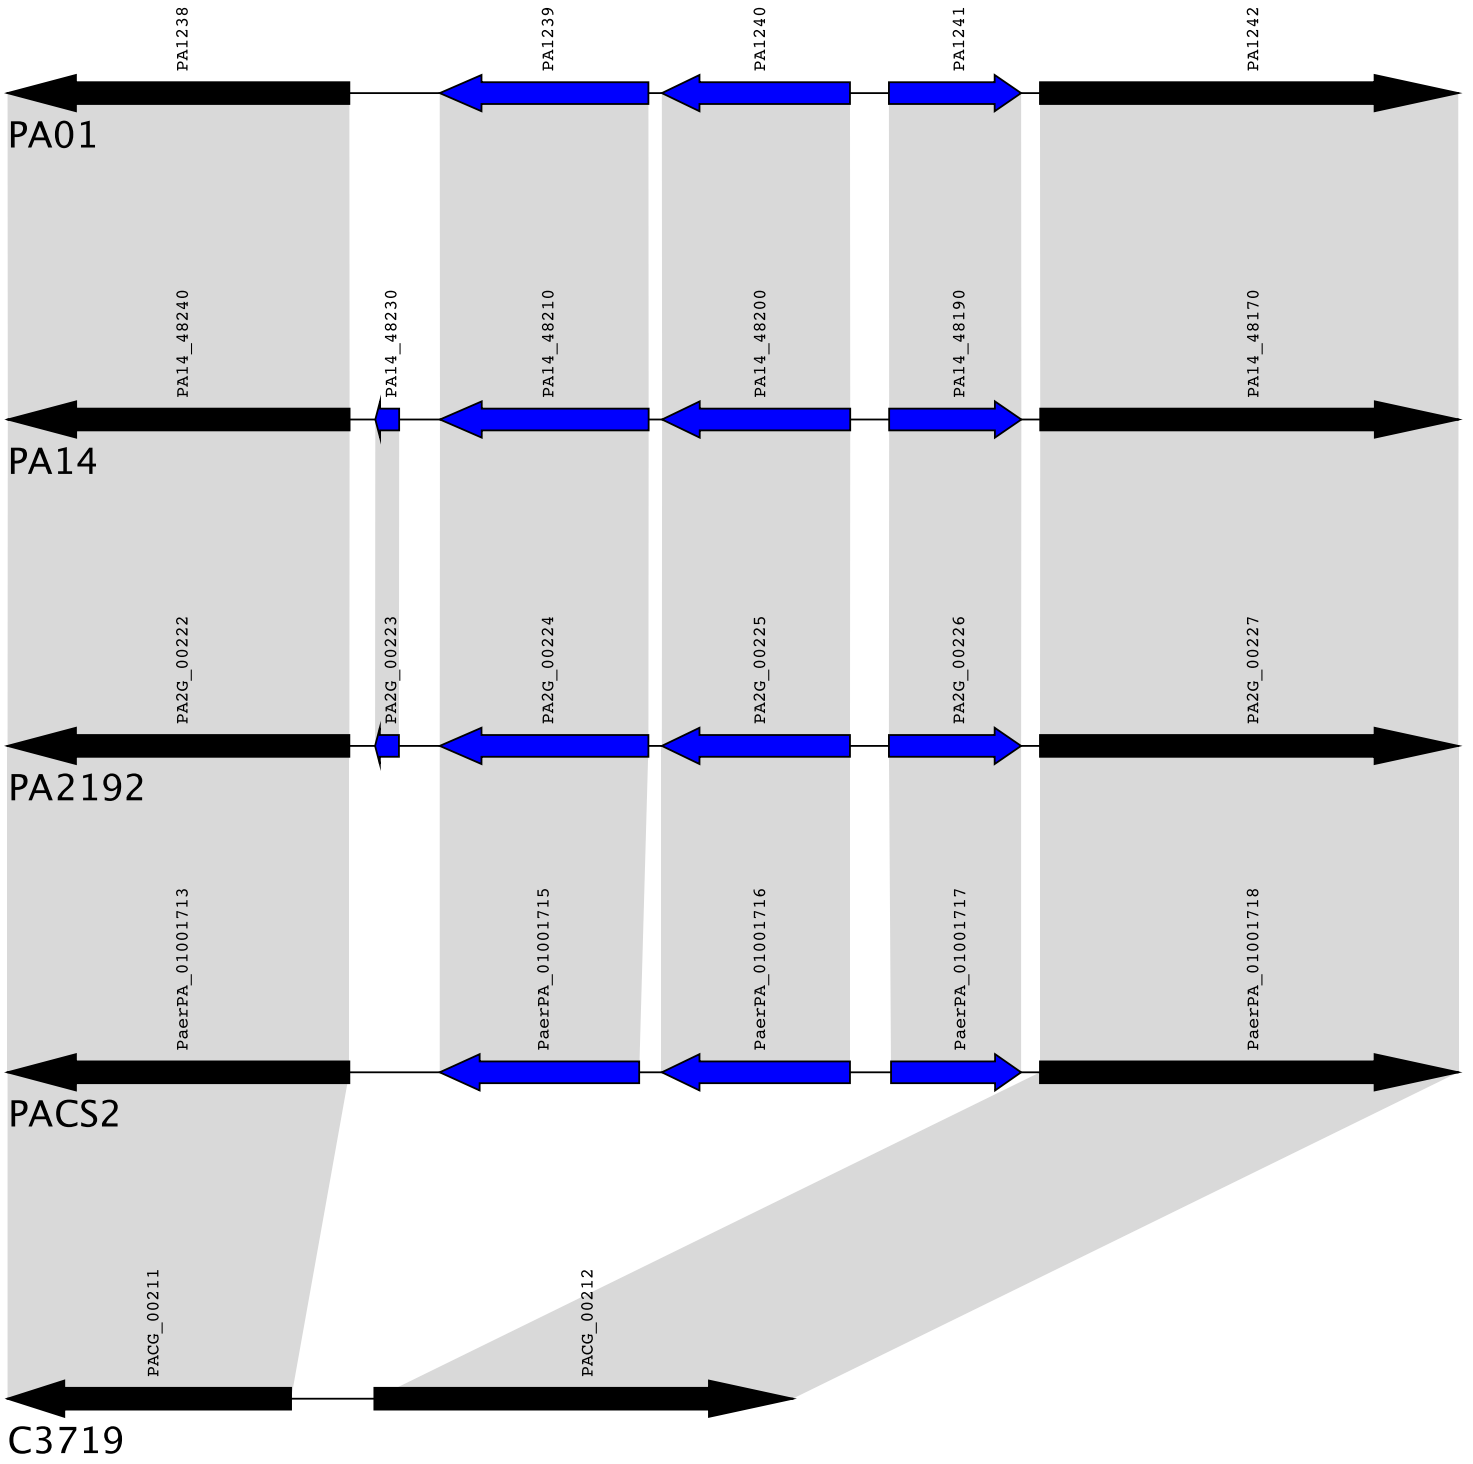

# RGP50

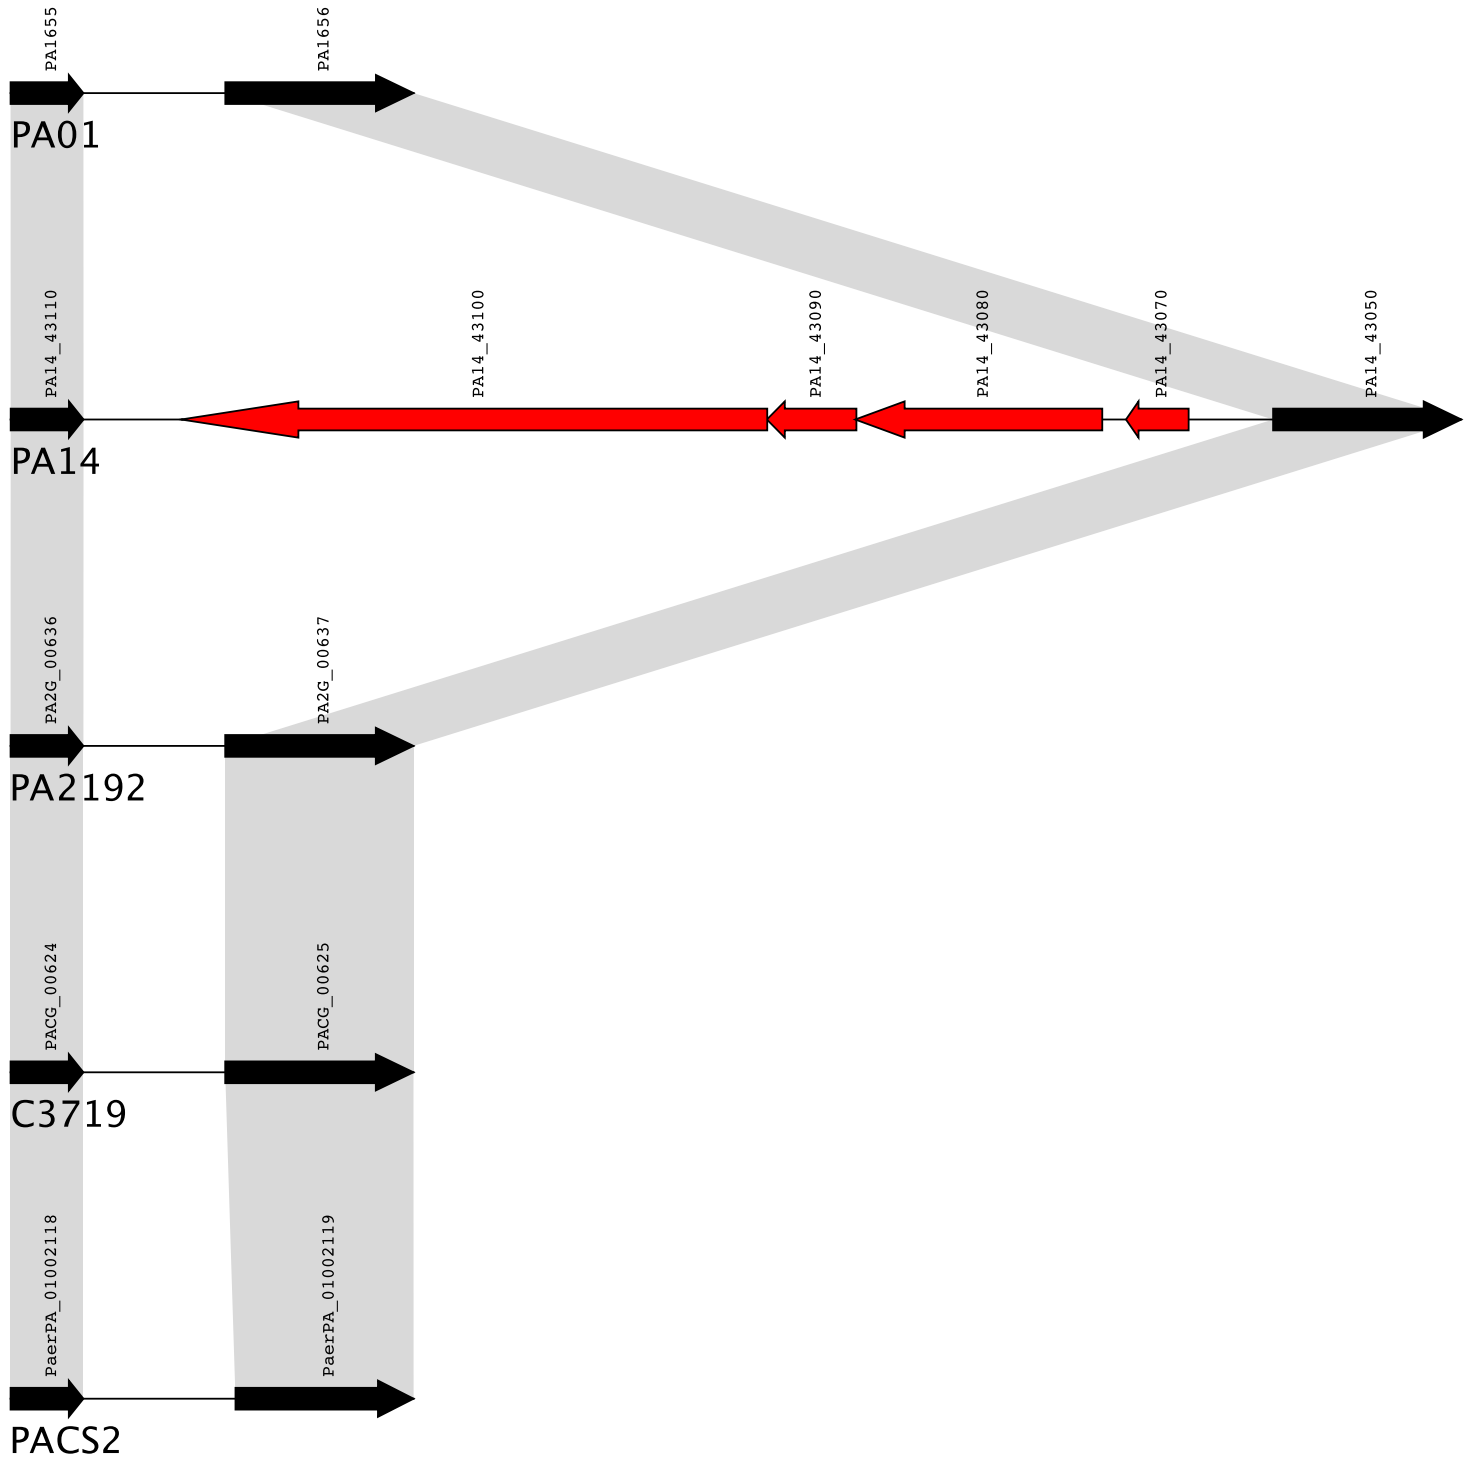

# RGP52

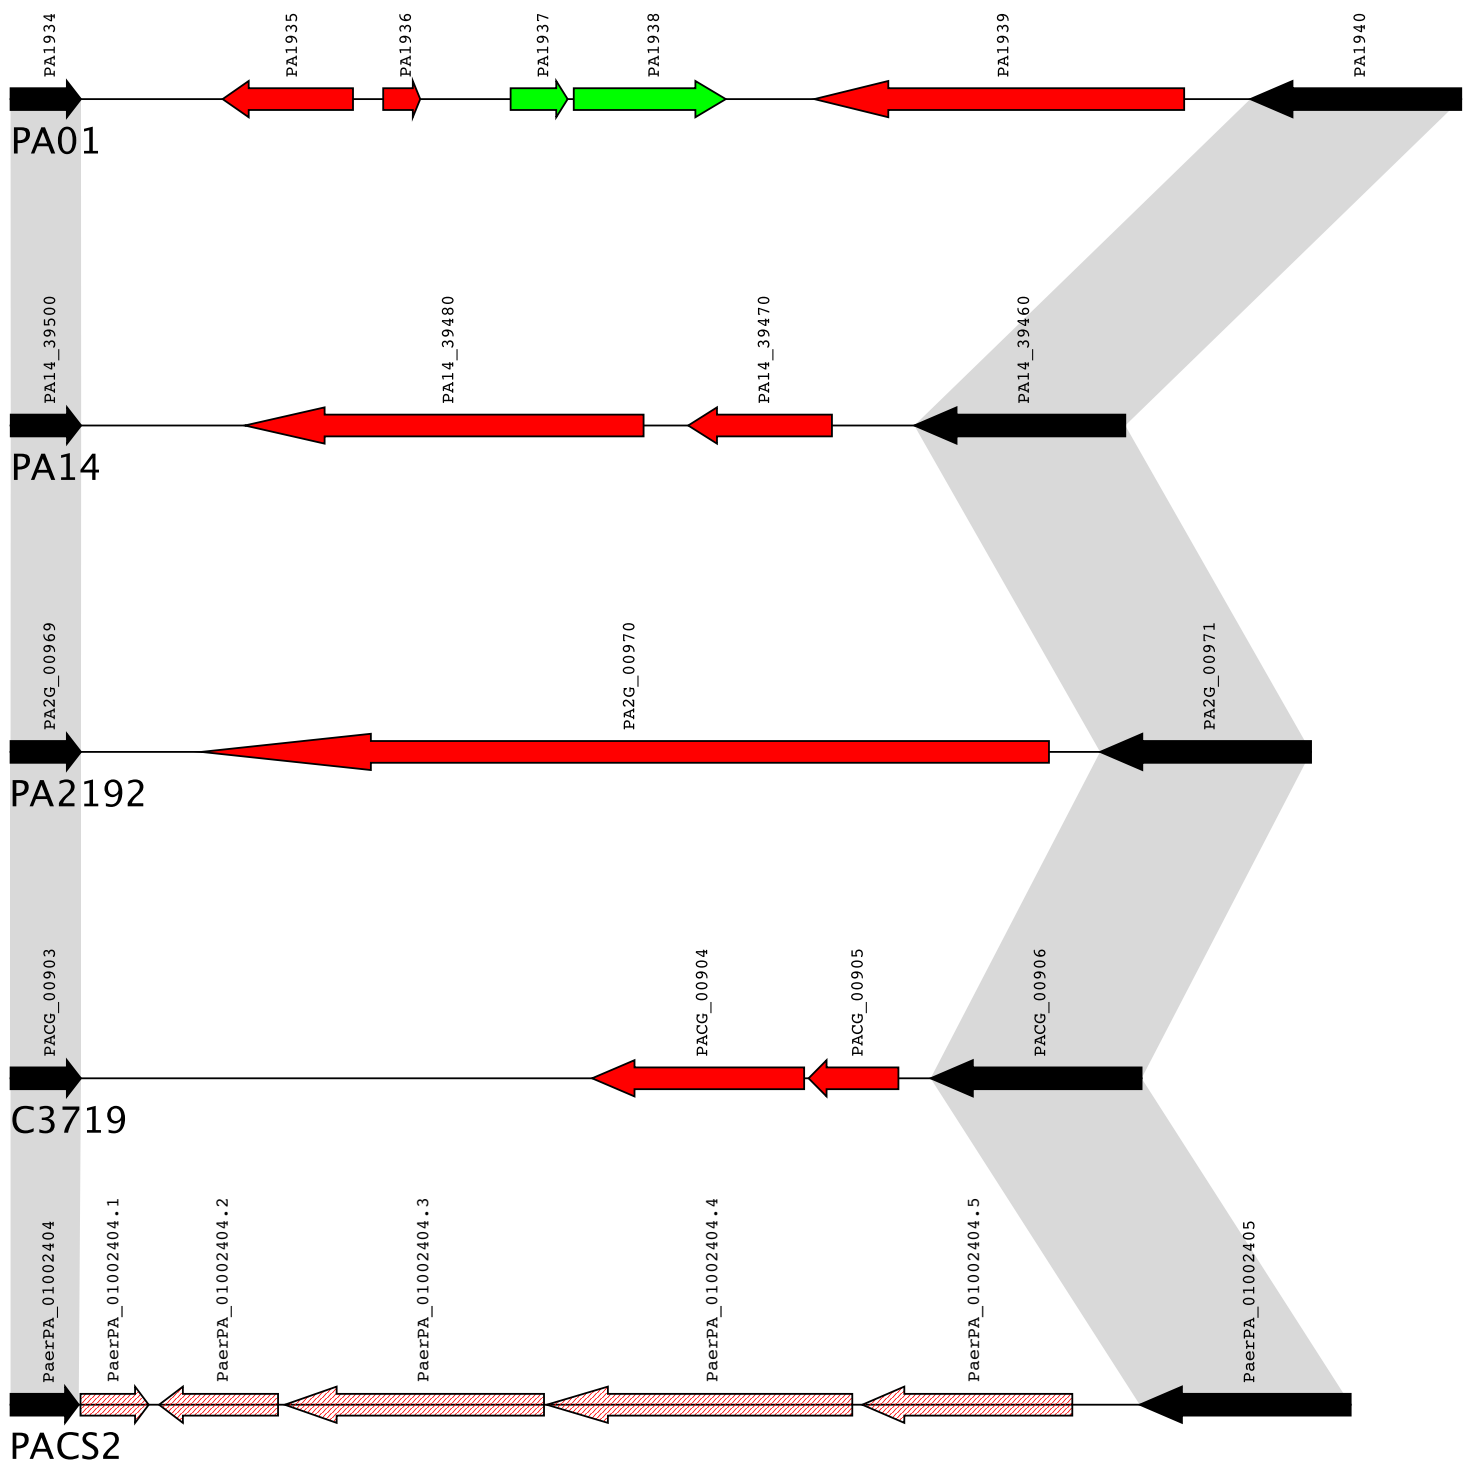

# RGP53

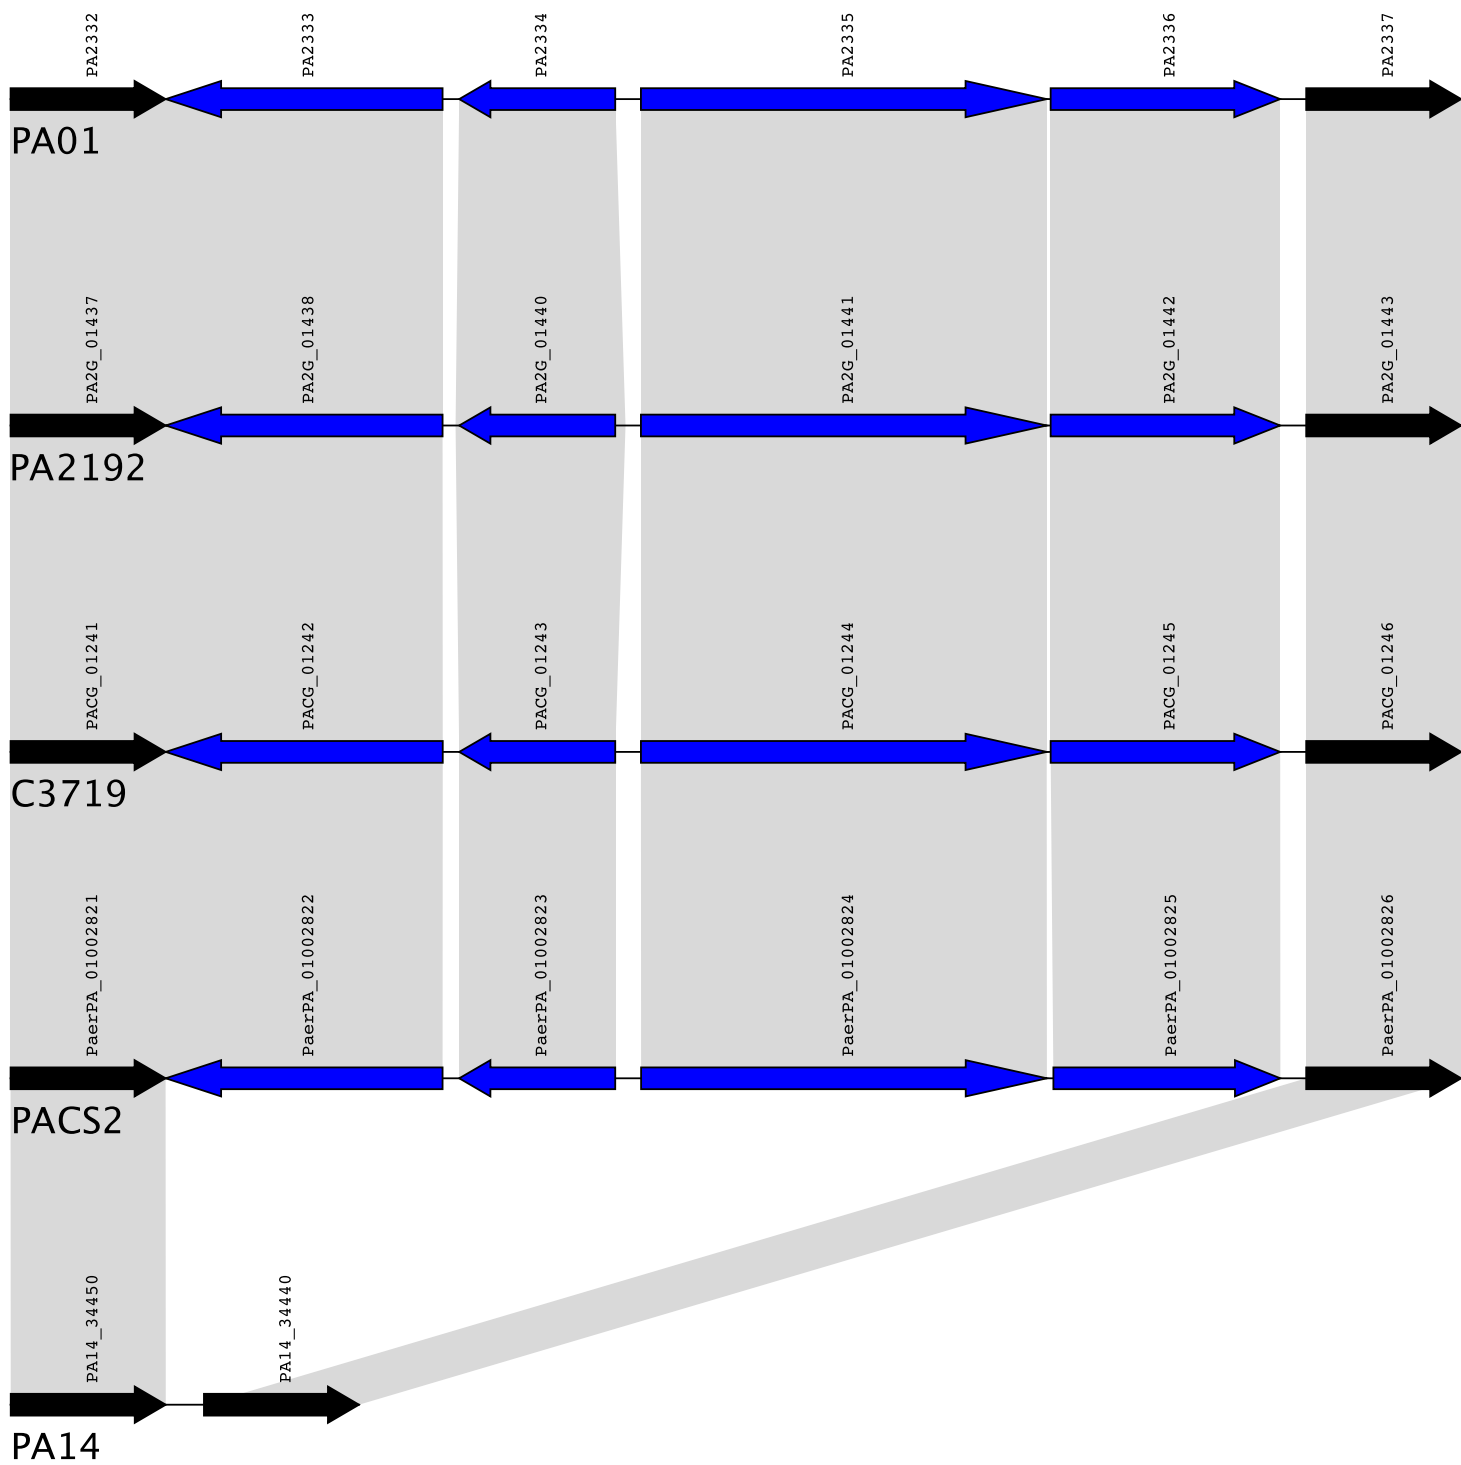

# RGP56

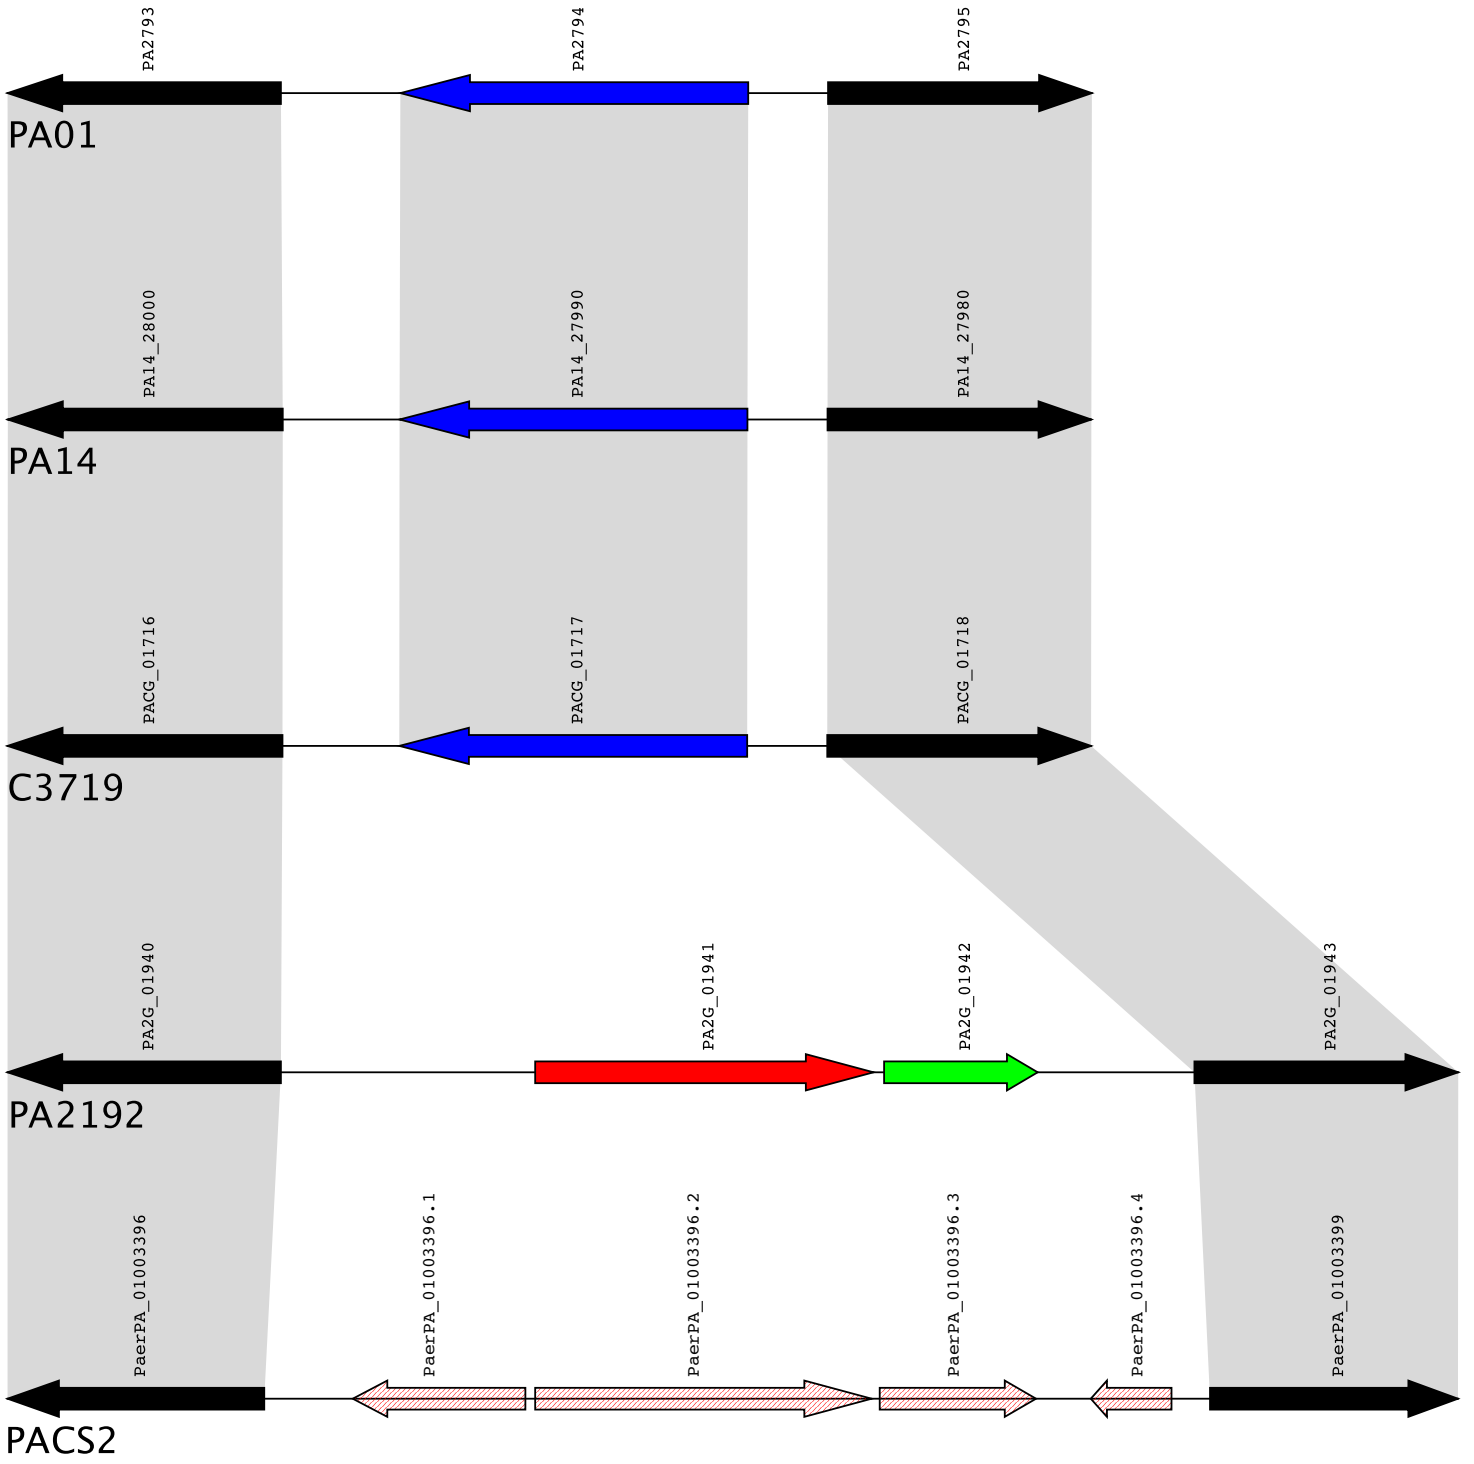

# RGP58

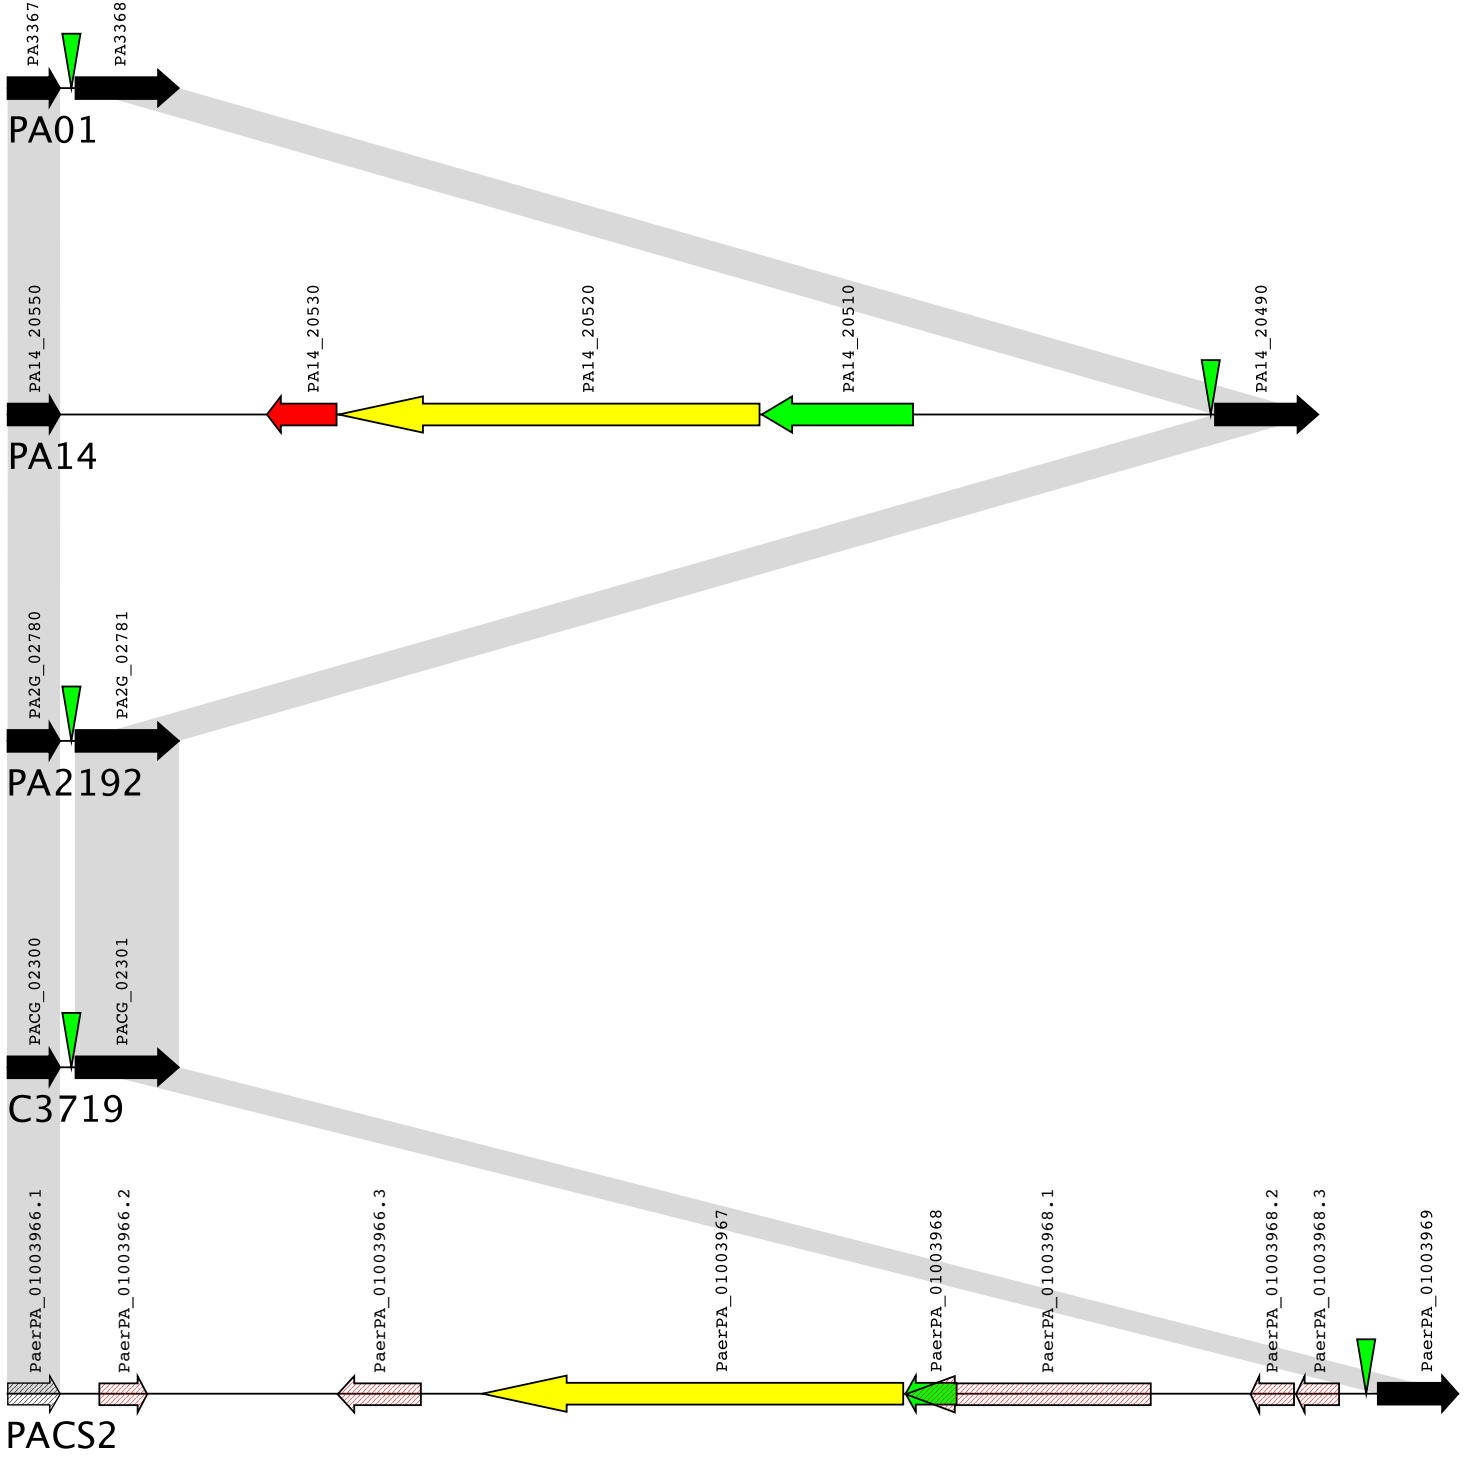

# RGP60

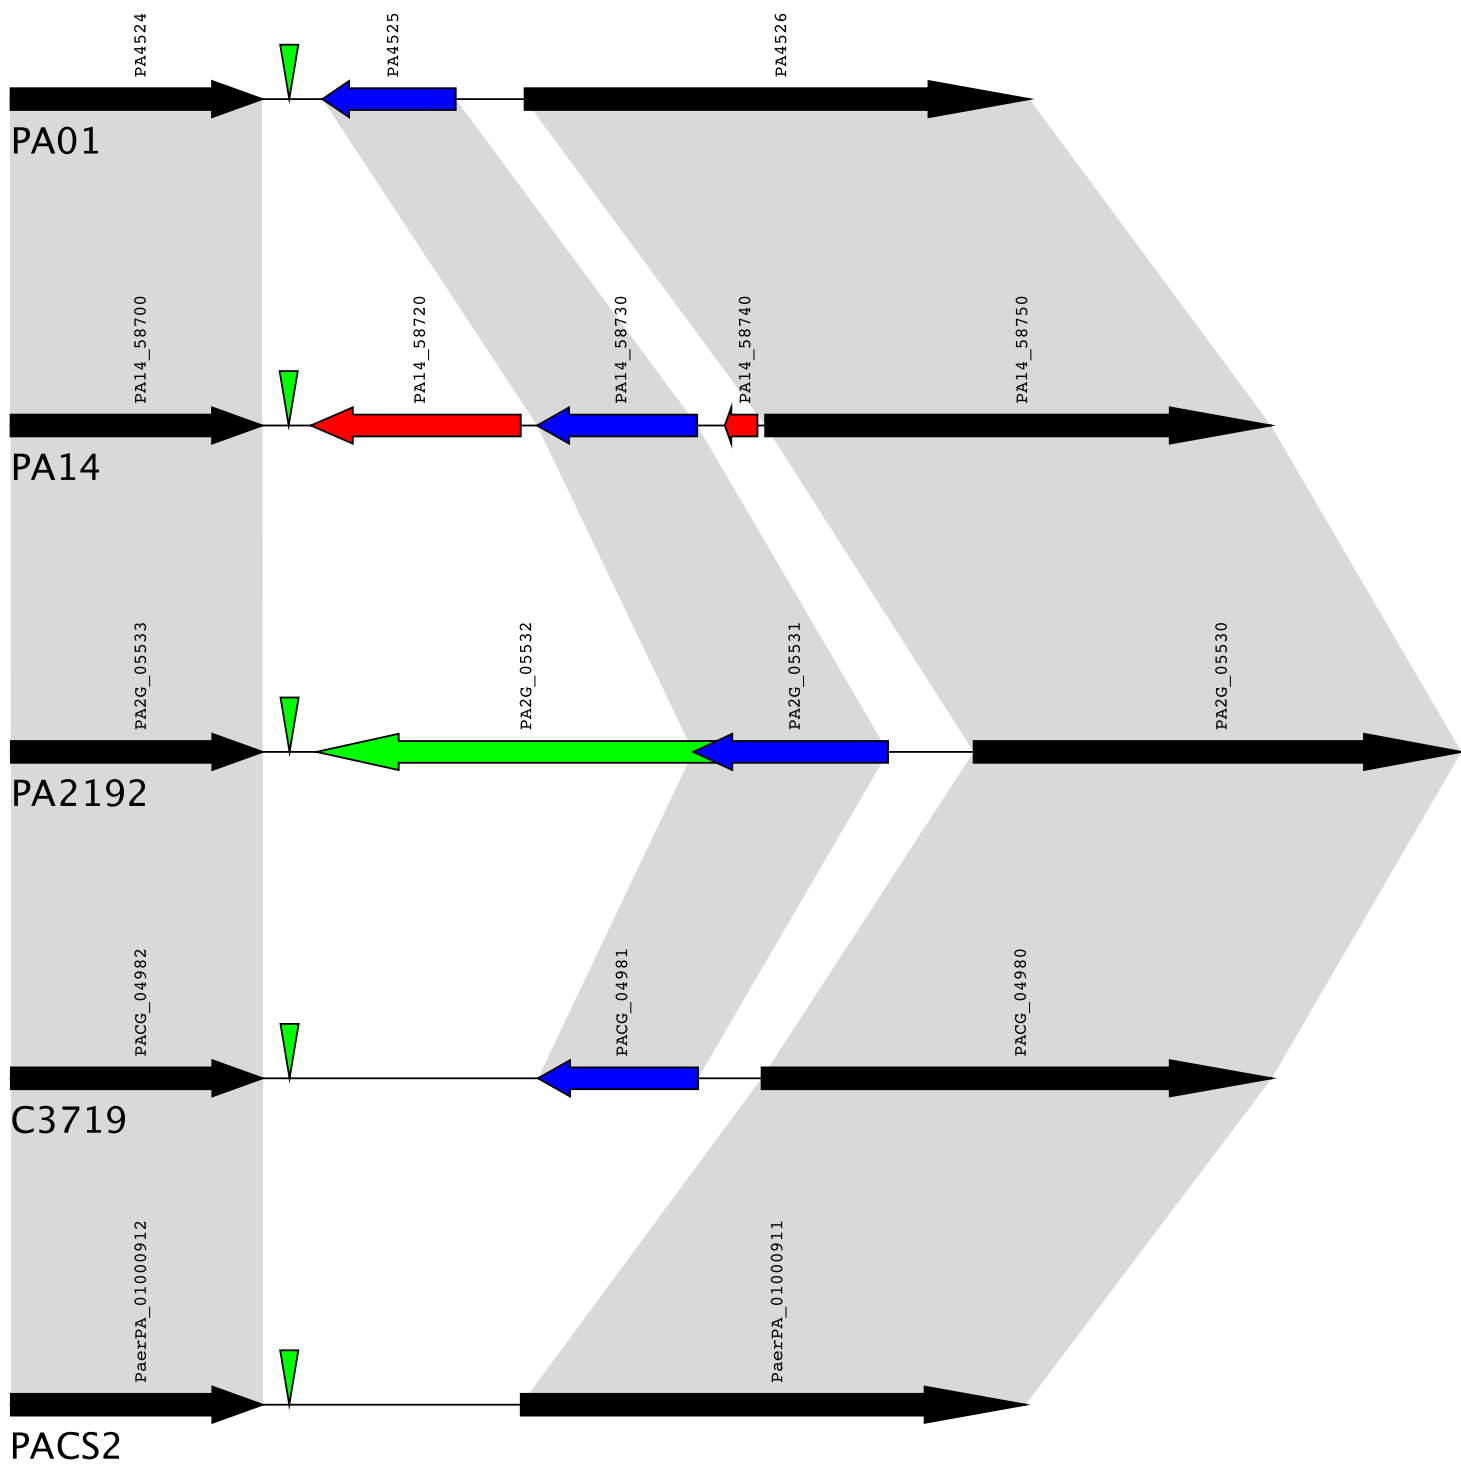

# RGP62

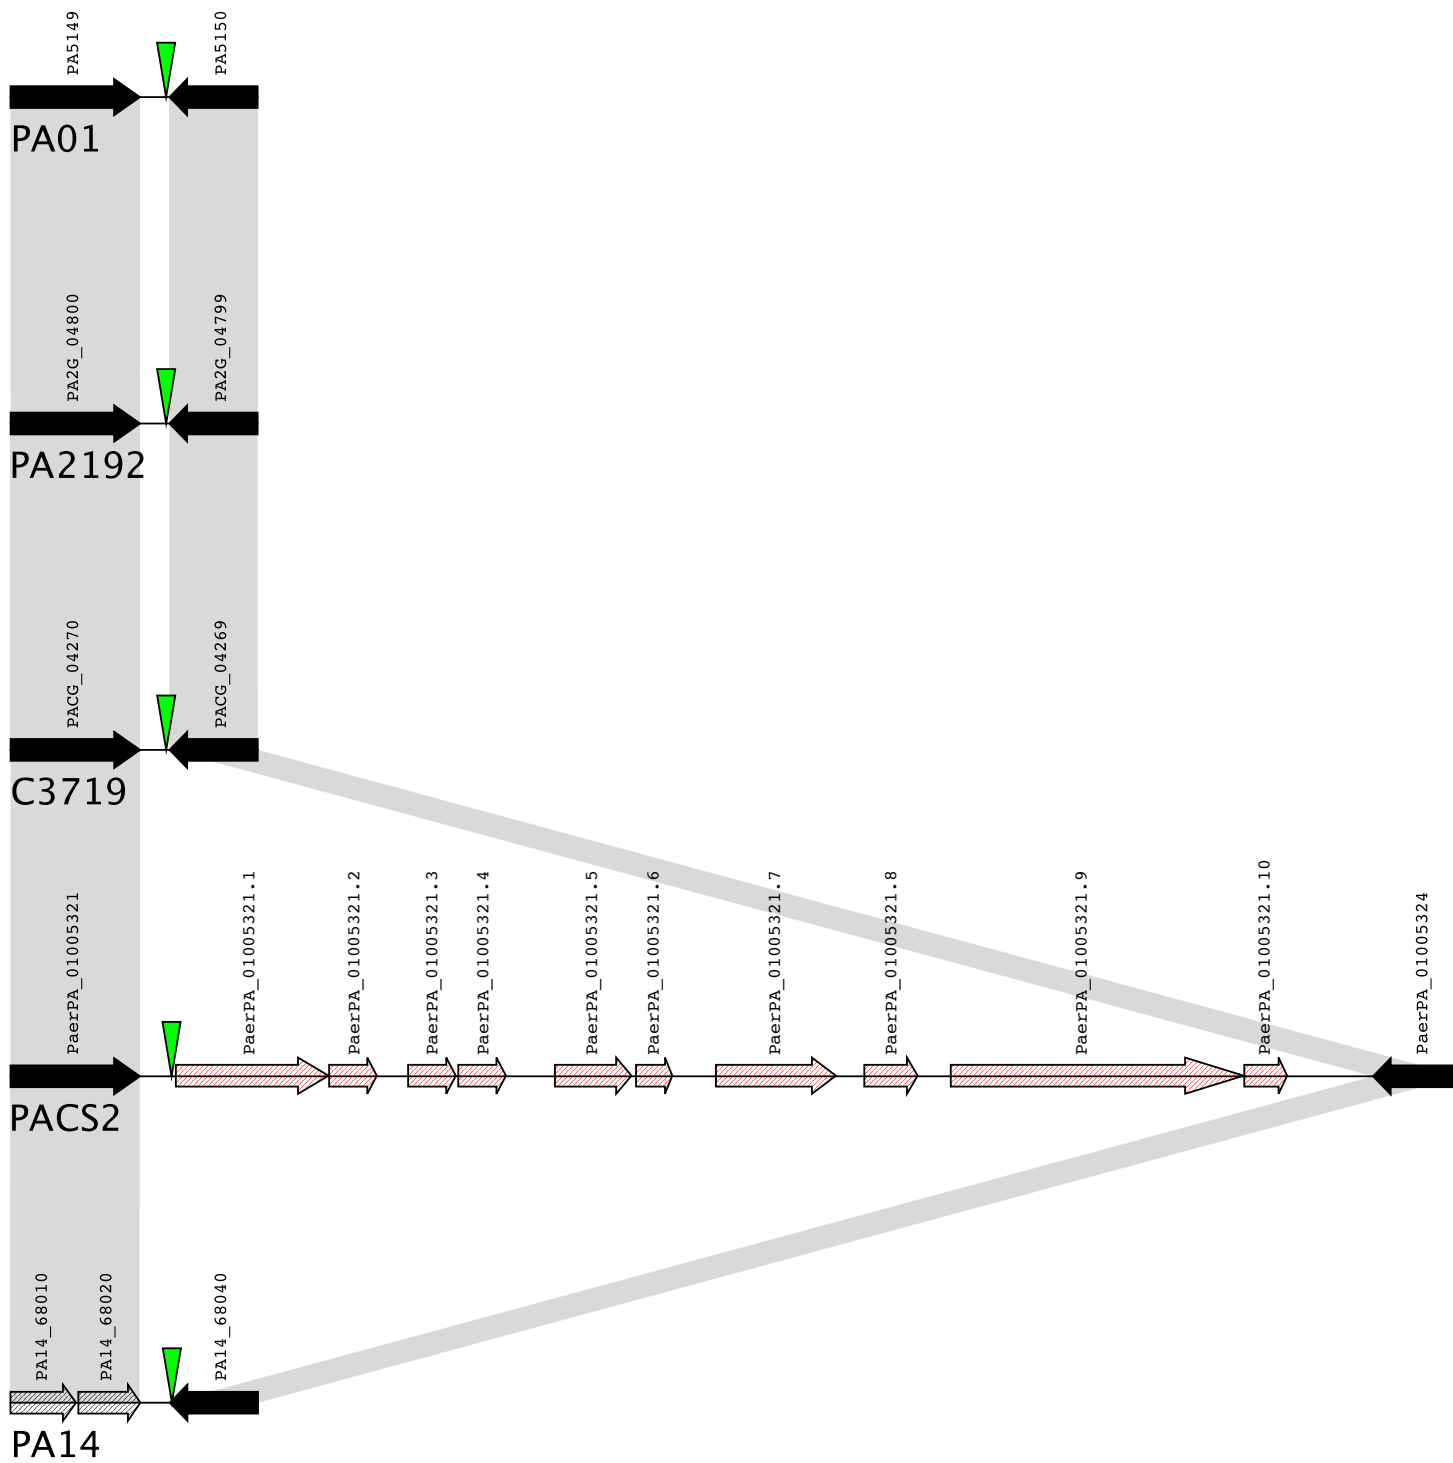

Supplement: pnas_0711982105_6.pdf [file pnas_0711982105_6.pdf]

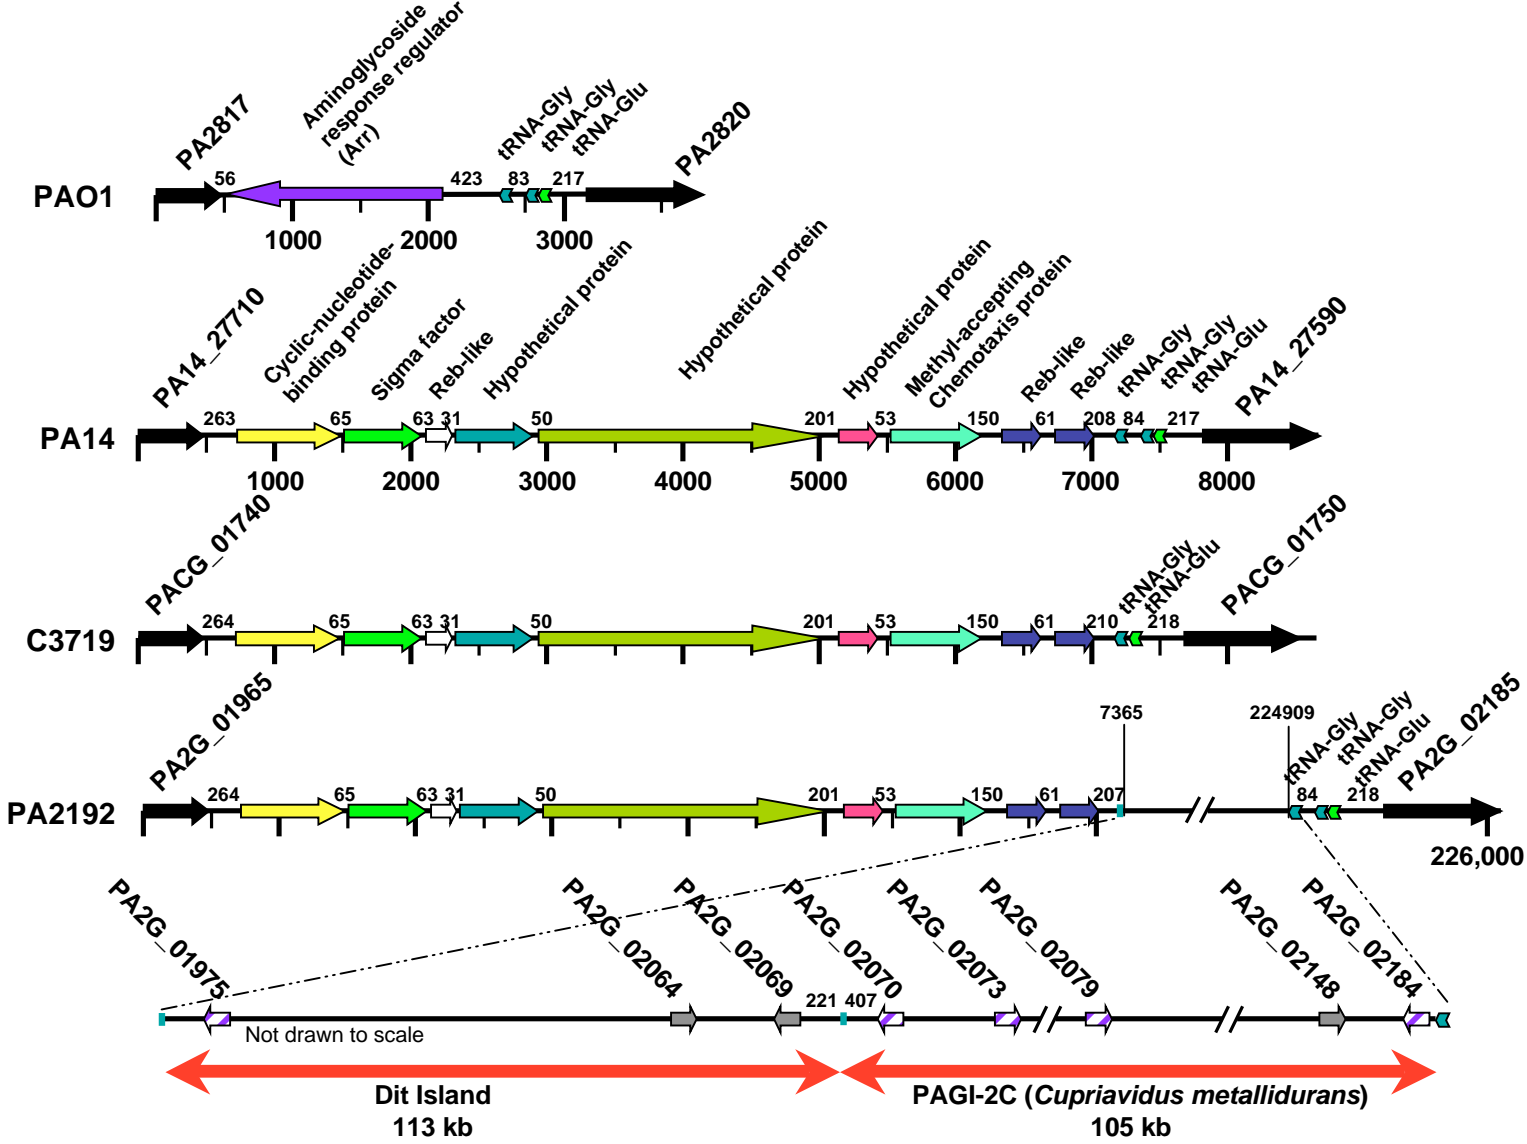

Supplement: pnas_0711982105_9.pdf [file pnas_0711982105_9.pdf]
